# Supplementary material for: Highly enantioselective tandem cycloisomerization/Diels–Alder reaction of 2-(1-alkynyl)-2-alken-1-ones and enals: dual catalysis with platinum and amines
Source: Royal Society of Chemistry journal article supplement (doi:10.1039/d1cc02080c), 2021-01-01

Supporting Information

**Highly Enantioselective Tandem Cycloisomerization/  
Diels-Alder Reaction of 2-(1-Alkynyl)-2-alken-1-ones and  
Enals: Dual Catalysis with Platinum and Amine**

Liejun Zhou,<sup>ab</sup> and Lu Liu<sup>\*ab</sup>

<sup>a</sup> School of Chemistry and Molecular Engineering, East China Normal University, 500 Dongchuan Road Shanghai, 200241, P. R. China

<sup>b</sup> Shanghai Engineering Research Center of Molecular Therapeutics and New Drug Development, East China Normal University, Shanghai 200062, P. R. China

E-mail: [lliu@chem.ecnu.edu.cn](mailto:lliu@chem.ecnu.edu.cn)

|   |                                               |    |
|---|-----------------------------------------------|----|
| 1 | General Information                           | 1  |
| 2 | General procedure for synthesis of <b>4</b> . | 2  |
| 3 | Transformations of <b>4a</b>                  | 41 |
| 4 | X-ray crystallographic analysis               | 47 |
| 5 | <sup>1</sup> H, <sup>13</sup> C NMR           | 48 |

## 1. General information.

Unless otherwise noted, all reactions were carried out under a nitrogen atmosphere; materials obtained from commercial suppliers were used directly without further purification. The  $[\alpha]_{\text{D}}^{20}$  was recorded using PolAAr 3005 High Accuracy Polarimeter. Infrared (IR) spectra were obtained using a Bruker tensor 27 infrared spectrometer.  $^1\text{H}$  NMR spectra,  $^{13}\text{C}$  NMR spectra were recorded on a Bruker 400, 500 MHz spectrometer in chloroform- $\text{d}_3$ . All signals are reported in ppm with the internal TMS signal at 0 ppm as a standard. The data is being reported as (s = singlet, d = doublet, t = triplet, hep = heptet, m = multiplet or unresolved, br = broad signal, coupling constant(s) in Hz, integration). Enantiomer ratios were determined using chiral HPLC analysis by comparison with authentic racemic materials. Solid aldehydes were used directly. All other liquid aldehydes were freshly distilled prior to use.

## 2. General procedure for synthesis of 4.

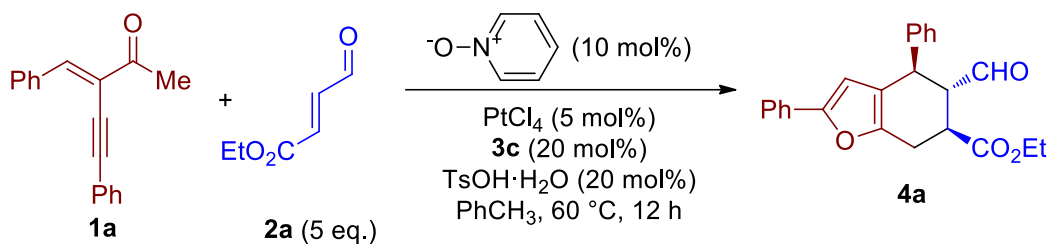

In a dried glass tube, a mixture of  $\text{PtCl}_4$  (5 mol%), pyridine *N*-oxide (10 mol%), (2*S*)-2-[Bis[3,5-bis(trifluoromethyl)phenyl]-[(trimethylsilyl)oxy]methyl]pyrrolidine (**3c**, 20 mol%),  $\text{TsOH} \cdot \text{H}_2\text{O}$  (20 mol%), **1a** (49.2 mg, 0.2 mmol) and **2a** ((*E*)-4-Oxo-2-butenic acid ethyl 128 mg, 1.0 mmol) was mixed in  $\text{PhCH}_3$  (2 mL), stirring at 60 °C until the reaction was complete (12 h). The mixture was passed through a short silica gel column and then concentrated under reduced pressure. The residue was purified by column chromatography on silica gel (hexanes/ $\text{EtOAc}$  = 25:1) to yield product (**4a**) as a solid (46.4 mg, 62%), which was confirmed by  $^1\text{H}$  NMR,  $^{13}\text{C}$  NMR spectrum, and enantio ratio was determined by chiral HPLC.

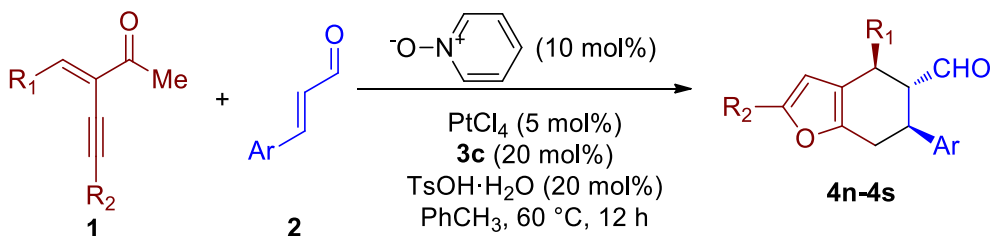

In a dried glass tube, a mixture of  $\text{PtCl}_4$  (5 mol%), pyridine *N*-oxide (10 mol%), (2*S*)-2-[Bis[3,5-bis(trifluoromethyl)phenyl]-[(trimethylsilyl)oxy]methyl]pyrrolidine (20 mol%),  $\text{TsOH} \cdot \text{H}_2\text{O}$  (20 mol%), **1** (0.4 mmol) and **2** (cinnamaldehyde derivatives, 0.2 mmol) was mixed in  $\text{PhCH}_3$  (2 mL), stirring at 60 °C until the reaction was complete (24 h), the mixture was passed through a short silica gel column and then concentrated under reduced pressure. The residue was purified by column chromatography on silica gel to yield product (**4n-4s**) as a solid.

1) (4R,5S,6S)-ethyl 5-formyl-2,4-diphenyl-4,5,6,7-tetrahydrobenzofuran-6-carboxylate (**4a**)

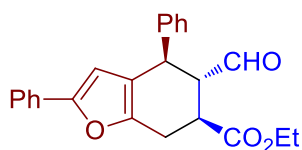

In a dried glass tube, a mixture of  $\text{PtCl}_4$  (5 mol%), pyridine *N*-oxide (10 mol%), (2S)-2-[Bis[3,5-bis(trifluoromethyl)phenyl]-[(trimethylsilyl)oxy]methyl]pyrrolidine (**3c**, 20 mol%),  $\text{TsOH} \cdot \text{H}_2\text{O}$  (20 mol%), **1a** (49.2 mg, 0.2 mmol) and **2a** (128 mg, 1.0 mmol) was mixed in  $\text{PhCH}_3$  (2 mL), stirring at 60 °C until the reaction was complete (12 h). The mixture was passed through a short silica gel column and then concentrated under reduced pressure. The residue was purified by column chromatography. **4a** (46.4 mg, 62%) was obtained as a solid.

$^1\text{H}$  NMR (400 MHz,  $\text{CDCl}_3$ )  $\delta$  9.71 (s, 1H), 7.56 (d,  $J = 7.6$  Hz, 2H), 7.36-7.28 (m, 5H), 7.24-7.19 (m, 3H), 6.18 (s, 1H), 4.12-4.06 (m, 2H), 3.99-3.95 (m, 1H), 3.33-3.30 (m, 2H), 3.15-3.07 (m, 2H), 1.19 (t,  $J = 7.2$  Hz, 3H)

$^{13}\text{C}$  NMR (100 MHz,  $\text{CDCl}_3$ )  $\delta$  203.0, 173.3, 153.3, 148.0, 141.1, 130.7, 128.8, 128.6, 128.5, 127.4, 127.2, 123.4, 121.0, 105.0, 61.2, 55.8, 41.4, 40.9, 25.3, 14.0

**HRMS** (ESI,  $m/z$ ):  $[\text{M}+\text{Na}]^+$  calcd. for  $\text{C}_{24}\text{H}_{22}\text{NaO}_4$  397.1410, found 397.1406

**HPLC analysis:** 92% ee (Chiralpak AD-H column, hexane/*i*-PrOH = 90/10, flow rate 0.5 mL/min, UV detection at 254 nm),  $R_t$  (minor) = 15.05 min,  $R_t$  (major) = 18.14 min

$[\alpha]_{\text{D}}^{20} = -16.4$  ( $c = 0.50$ ,  $\text{CHCl}_3$ )

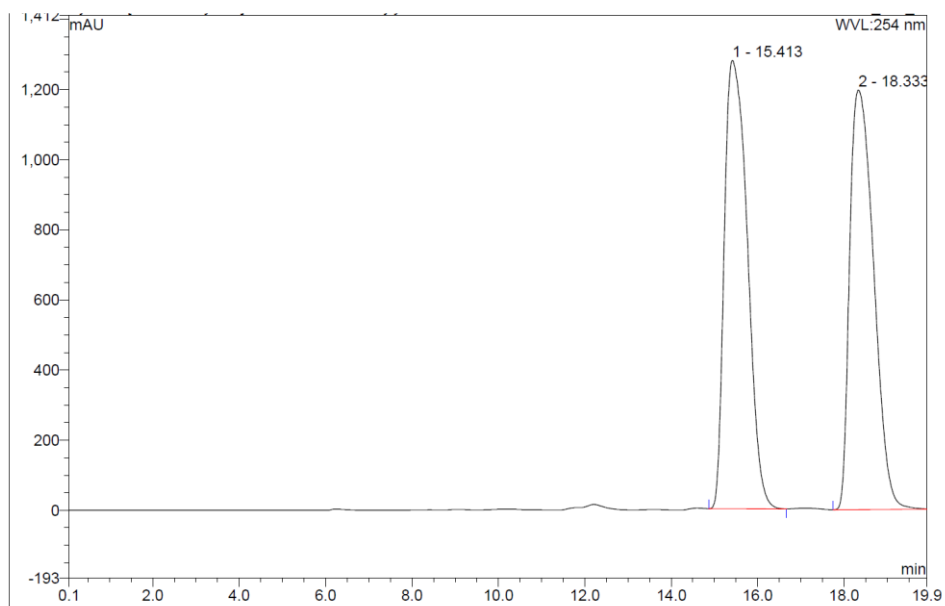

| 序号  | 保留时间<br>min | 峰名称  | 峰高<br>mAU | 峰面积<br>mAU*min | 相对峰面积<br>% | 样品量   | 类型   |
|-----|-------------|------|-----------|----------------|------------|-------|------|
| 1   | 15.41       | n.a. | 1278.692  | 787.537        | 50.60      | n.a.  | BMB* |
| 2   | 18.33       | n.a. | 1196.930  | 768.721        | 49.40      | n.a.  | BMB  |
| 总和: |             |      | 2475.622  | 1556.258       | 100.00     | 0.000 |      |

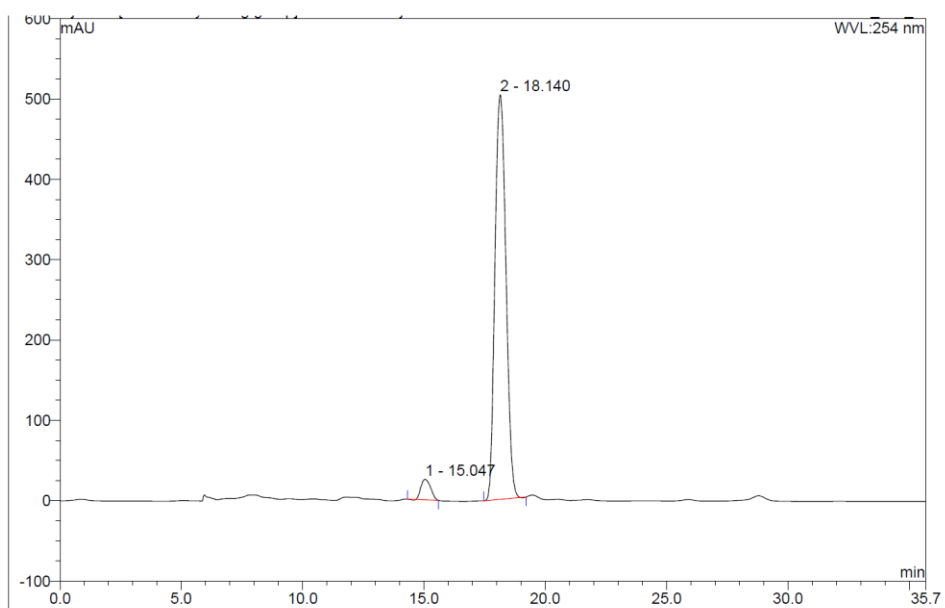

| 序号  | 保留时间<br>min | 峰名称  | 峰高<br>mAU | 峰面积<br>mAU*min | 相对峰面积<br>% | 样品量   | 类型   |
|-----|-------------|------|-----------|----------------|------------|-------|------|
| 1   | 15.05       | n.a. | 25.366    | 11.600         | 4.21       | n.a.  | BMB* |
| 2   | 18.14       | n.a. | 503.558   | 263.986        | 95.79      | n.a.  | BMB* |
| 总和: |             |      | 528.924   | 275.586        | 100.00     | 0.000 |      |

2) (4R,5S,6S)-ethyl

5-formyl-4-phenyl-2-(p-tolyl)-4,5,6,7-tetrahydrobenzofuran-6-carboxylate

(4b)

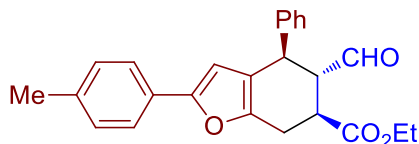

In a dried glass tube, a mixture of  $\text{PtCl}_4$  (5 mol%), pyridine *N*-oxide (10 mol%), (2S)-2-[Bis[3,5-bis(trifluoromethyl)phenyl]-[(trimethylsilyl)oxy]methyl]pyrrolidine (**3c**, 20 mol%),  $\text{TsOH} \cdot \text{H}_2\text{O}$  (20 mol%), **1b** (52.0 mg, 0.2 mmol) and **2a** (128 mg, 1.0 mmol) was mixed in  $\text{PhCH}_3$  (2 mL), stirring at 60 °C until the reaction was complete (12 h). The mixture was passed through a short silica gel column and then concentrated under reduced pressure. The residue was purified by column chromatography. **4b** (46.6 mg, 60%) was obtained as a solid.

$^1\text{H}$  NMR (400 MHz,  $\text{CDCl}_3$ )  $\delta$  9.70 (s, 1H), 7.45 (d,  $J = 8.0$  Hz, 2H), 7.34-7.32 (m, 2H), 7.30 – 7.26 (m, 1H), 7.25 – 7.19 (m, 2H), 7.13 (d,  $J = 8.0$  Hz, 2H), 6.12 (s, 1H), 4.16 – 4.03 (m, 2H), 3.97 (dq,  $J = 10.8, 7.2$  Hz, 1H), 3.38 – 3.22 (m, 2H), 3.16 (dd,  $J = 16.4, 4.8$  Hz, 1H), 3.04 (ddd,  $J = 16.2, 7.2, 3.2$  Hz, 1H), 2.33 (s, 3H), 1.19 (t,  $J = 7.2$  Hz, 3H)

$^{13}\text{C}$  NMR (100 MHz,  $\text{CDCl}_3$ )  $\delta$  203.1, 173.3, 153.5, 147.5, 141.1, 137.1, 129.3, 128.8, 128.5, 128.0, 127.4, 123.4, 120.8, 104.3, 61.2, 55.8, 41.5, 41.0, 25.3, 21.3, 14.0

**HRMS** (ESI,  $m/z$ ):  $[\text{M}+\text{Na}]^+$  calcd. for  $\text{C}_{25}\text{H}_{24}\text{NaO}_4$  411.1567, found 411.1588

**HPLC analysis:** 92% ee (Chiralpak AD-H column, hexane/*i*-PrOH = 90/10, flow rate 0.5 mL/min, UV detection at 254 nm),  $R_t$  (minor) = 15.75 min,  $R_t$  (major) = 18.17 min

$[\alpha]_{\text{D}}^{20} = -10.7$  ( $c = 0.50$ ,  $\text{CHCl}_3$ )

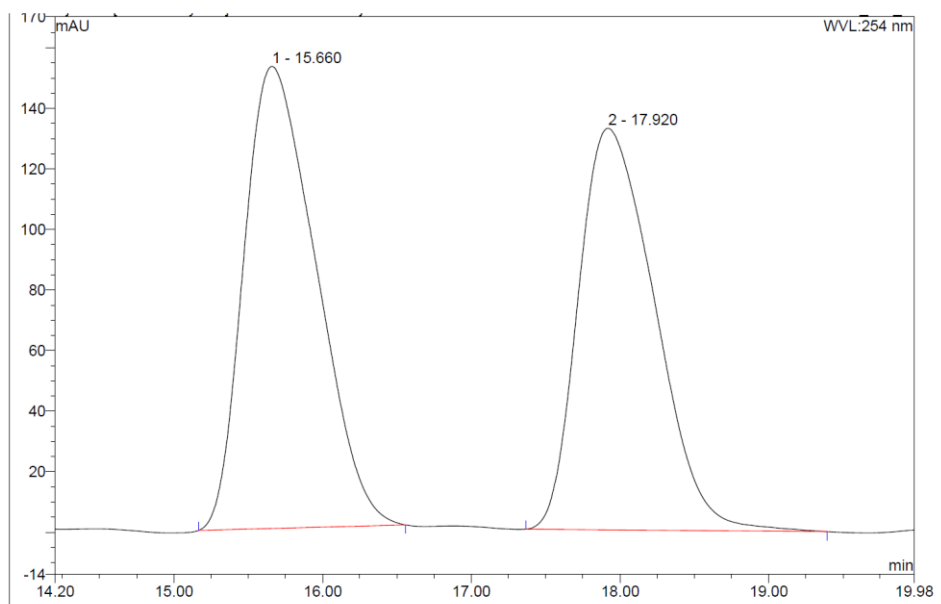

| 序号  | 保留时间<br>min | 峰名称  | 峰高<br>mAU | 峰面积<br>mAU*min | 相对峰面积<br>% | 样品量   | 类型   |
|-----|-------------|------|-----------|----------------|------------|-------|------|
| 1   | 15.66       | n.a. | 152.633   | 85.709         | 52.08      | n.a.  | BMB* |
| 2   | 17.92       | n.a. | 132.671   | 78.874         | 47.92      | n.a.  | BMB* |
| 总和: |             |      | 285.304   | 164.583        | 100.00     | 0.000 |      |

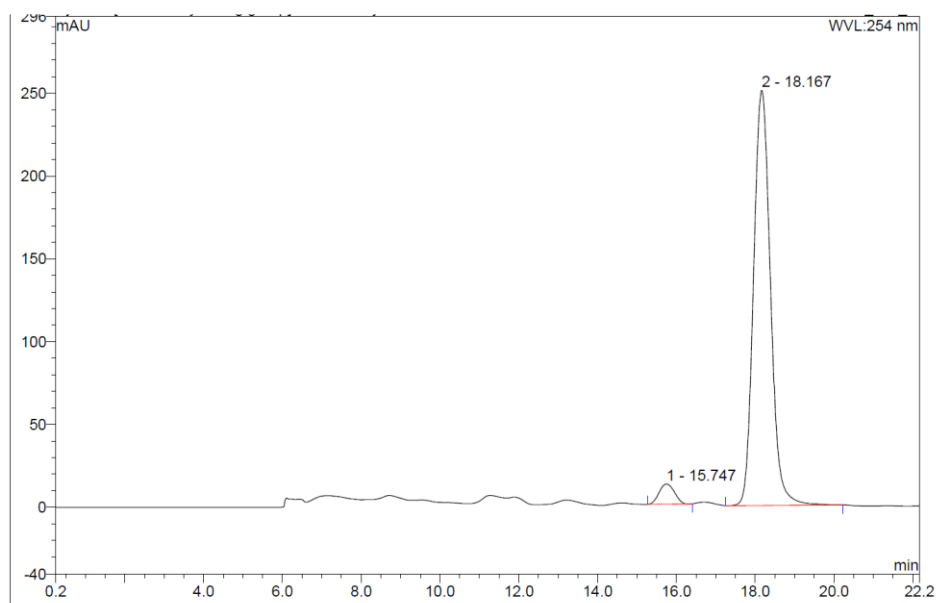

| 序号  | 保留时间<br>min | 峰名称  | 峰高<br>mAU | 峰面积<br>mAU*min | 相对峰面积<br>% | 样品量   | 类型   |
|-----|-------------|------|-----------|----------------|------------|-------|------|
| 1   | 15.75       | n.a. | 12.080    | 5.438          | 4.18       | n.a.  | BMB* |
| 2   | 18.17       | n.a. | 250.643   | 124.587        | 95.82      | n.a.  | BMB* |
| 总和: |             |      | 262.723   | 130.025        | 100.00     | 0.000 |      |

### 3) (4R,5S,6S)-ethyl

#### 5-formyl-2-(4-methoxyphenyl)-4-phenyl-4,5,6,7-tetrahydrobenzofuran-6-carboxylate (**4c**)

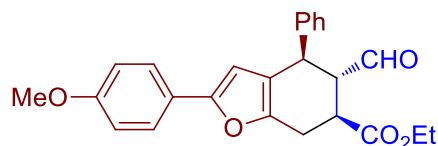

In a dried glass tube, a mixture of  $\text{PtCl}_4$  (5 mol%), pyridine *N*-oxide (10 mol%), (2S)-2-[Bis[3,5-bis(trifluoromethyl)phenyl]-[(trimethylsilyl)oxy]methyl]pyrrolidine (**3c**, 20 mol%),  $\text{TsOH} \cdot \text{H}_2\text{O}$  (20 mol%), **1c** (55.2 mg, 0.2 mmol) and **2a** (128 mg, 1.0 mmol) was mixed in  $\text{PhCH}_3$  (2 mL), stirring at 60 °C until the reaction was complete (12 h). The mixture was passed through a short silica gel column and then concentrated under reduced pressure. The residue was purified by column chromatography. **4c** (48.7mg, 60%) was obtained as a solid.

$^1\text{H}$  NMR (500 MHz,  $\text{CDCl}_3$ )  $\delta$  9.70 (s, 1H), 7.48 (d,  $J = 8.8$  Hz, 2H), 7.37 – 7.30 (m, 2H), 7.30 – 7.26 (m, 1H), 7.25 – 7.20 (m, 2H), 6.86 (d,  $J = 8.8$  Hz, 2H), 6.04 (s, 1H), 4.15 – 4.03 (m, 2H), 3.96 (dq,  $J = 10.8, 7.2$  Hz, 1H), 3.80 (s, 3H), 3.36 – 3.25 (m, 2H), 3.15 (dd,  $J = 16.4, 4.8$  Hz, 1H), 3.08 – 2.99 (m, 1H), 1.19 (t,  $J = 7.2$  Hz, 3H).  $^{13}\text{C}$  NMR (100 MHz,  $\text{CDCl}_3$ )  $\delta$  203.1, 173.3, 158.9, 153.4, 147.2, 141.2, 128.8, 128.5, 127.4, 124.9, 123.8, 120.8, 114.1, 103.4, 61.2, 55.8, 55.3, 41.5, 40.9, 25.2, 14.0

**HRMS** (ESI,  $m/z$ ):  $[\text{M}+\text{Na}]^+$  calcd.for  $\text{C}_{25}\text{H}_{24}\text{NaO}_5$  427.1516, found: 427.1529

**HPLC analysis:** 93% ee (Chiralpak AD-H column, hexane/*i*-PrOH = 90/10, flow rate 0.5 mL/min, UV detection at 254 nm),  $R_t$  (major) = 24.59 min,  $R_t$  (minor) = 30.12 min

$[\alpha]_{\text{D}}^{20} = -21.0$  ( $c = 0.6$ ,  $\text{CHCl}_3$ )

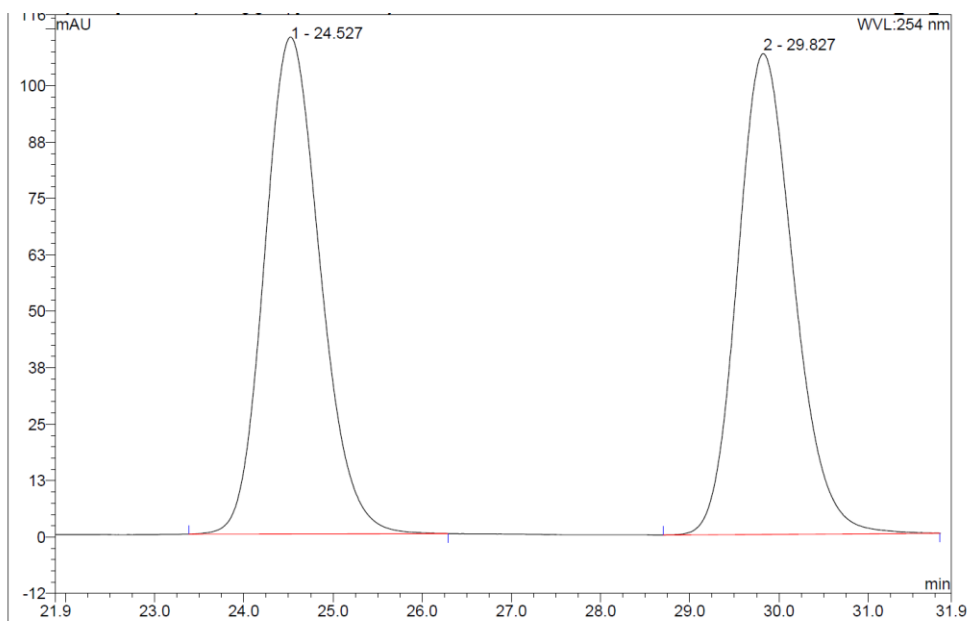

| 序号  | 保留时间<br>min | 峰名称  | 峰高<br>mAU | 峰面积<br>mAU*min | 相对峰面积<br>% | 样品量   | 类型   |
|-----|-------------|------|-----------|----------------|------------|-------|------|
| 1   | 24.53       | n.a. | 110.045   | 79.717         | 50.50      | n.a.  | BMB* |
| 2   | 29.83       | n.a. | 106.471   | 78.138         | 49.50      | n.a.  | BMB* |
| 总和: |             |      | 216.515   | 157.856        | 100.00     | 0.000 |      |

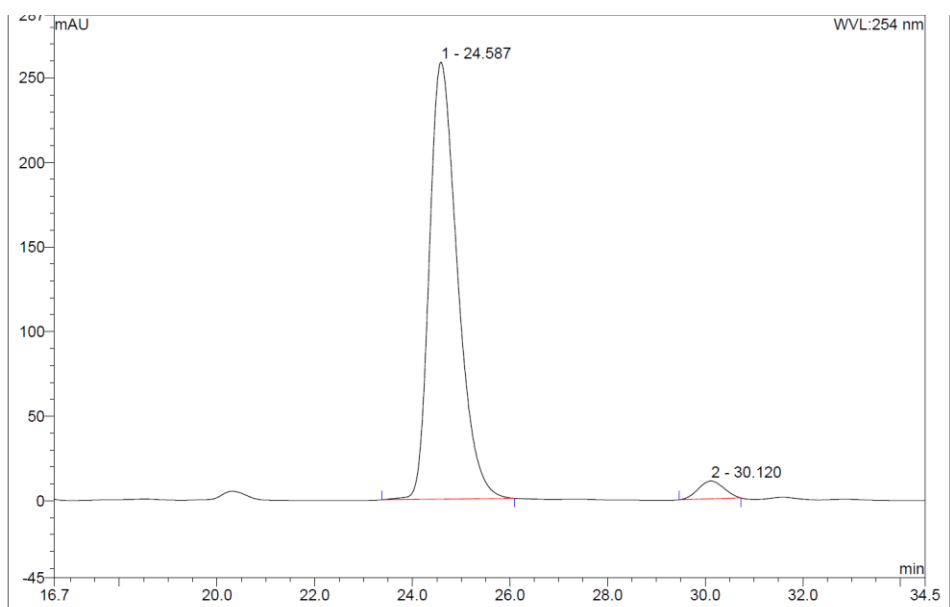

| 序号  | 保留时间<br>min | 峰名称  | 峰高<br>mAU | 峰面积<br>mAU*min | 相对峰面积<br>% | 样品量   | 类型   |
|-----|-------------|------|-----------|----------------|------------|-------|------|
| 1   | 24.59       | n.a. | 258.298   | 171.816        | 96.42      | n.a.  | BMB* |
| 2   | 30.12       | n.a. | 10.493    | 6.380          | 3.58       | n.a.  | BMB* |
| 总和: |             |      | 268.791   | 178.196        | 100.00     | 0.000 |      |

#### 4) (4R,5S,6S)-ethyl

#### 2-(4-bromophenyl)-5-formyl-4-phenyl-4,5,6,7-tetrahydrobenzofuran-6-carboxylate (**4d**)

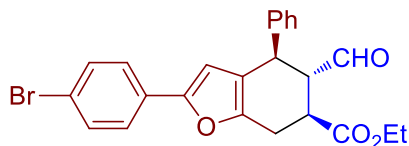

In a dried glass tube, a mixture of  $\text{PtCl}_4$  (5 mol%), pyridine *N*-oxide (10 mol%), (2S)-2-[Bis[3,5-bis(trifluoromethyl)phenyl]-[(trimethylsilyl)oxy]methyl]pyrrolidine (**3c**, 20 mol%),  $\text{TsOH} \cdot \text{H}_2\text{O}$  (20 mol%), **1d** (64.8 mg, 0.2 mmol) and **2a** (128 mg, 1.0 mmol) was mixed in  $\text{PhCH}_3$  (2 mL), stirring at 60 °C until the reaction was complete (12 h). The mixture was passed through a short silica gel column and then concentrated under reduced pressure. The residue was purified by column chromatography. **4d** (43.4 mg, 48%) was obtained as a solid.

$^1\text{H}$  NMR (400 MHz,  $\text{CDCl}_3$ )  $\delta$  9.71 (s, 1H), 7.58 – 7.52 (m, 2H), 7.46 (d,  $J$  = 8.5 Hz, 2H), 7.33 (t,  $J$  = 7.5 Hz, 2H), 7.22 (t,  $J$  = 7.5 Hz, 1H), 7.10 (d,  $J$  = 8.5 Hz, 2H), 6.16 (s, 1H), 4.16 – 4.06 (m, 2H), 3.99 (dq,  $J$  = 11.0, 7.0 Hz, 1H), 3.35 – 3.22 (m, 2H), 3.16 (dd,  $J$  = 16.0, 5.5 Hz, 1H), 3.10 – 3.00 (m, 1H), 1.20 (t,  $J$  = 7.0 Hz, 3H)

$^{13}\text{C}$  NMR (100 MHz,  $\text{CDCl}_3$ )  $\delta$  202.5, 173.0, 153.5, 148.1, 140.2, 131.9, 130.5, 130.3, 128.7, 127.4, 123.5, 121.3, 120.4, 104.7, 61.4, 55.7, 41.0, 40.7, 25.2, 14.0

**HRMS** (ESI,  $m/z$ ):  $[\text{M}+\text{H}]^+$ : calcd. for  $\text{C}_{24}\text{H}_{22}\text{BrO}_4$  453.0696, found: 453.0690

**HPLC analysis:** 90% ee (Chiralpak AD-H column, hexane/*i*-PrOH = 90/10, flow rate 0.5 mL/min, UV detection at 254 nm),  $R_t$  (major) = 20.74 min;  $R_t$  (minor) = 22.76 min

$[\alpha]_{\text{D}}^{20}$  = -7.4 ( $c$  = 0.50,  $\text{CHCl}_3$ )

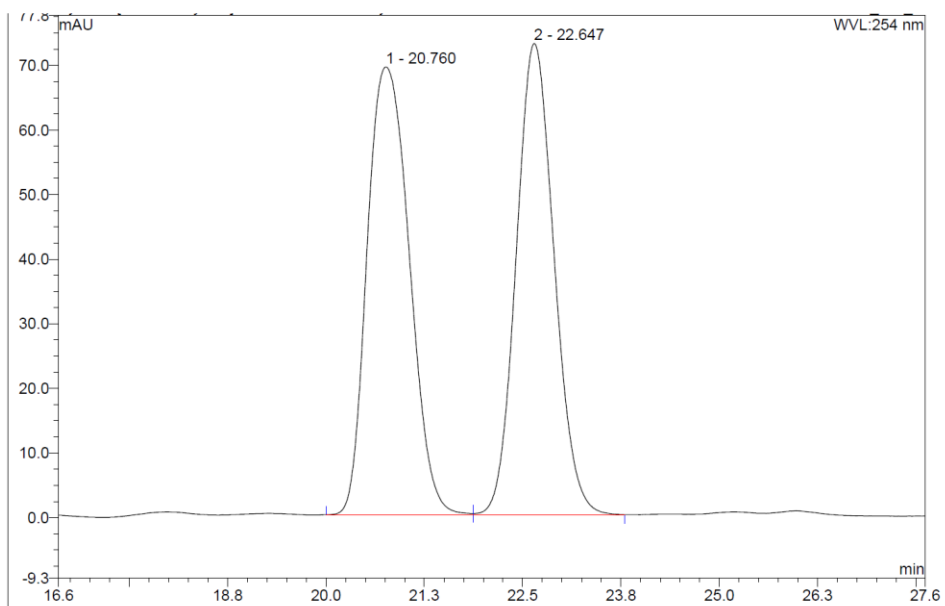

| 序号  | 保留时间<br>min | 峰名称  | 峰高<br>mAU | 峰面积<br>mAU*min | 相对峰面积<br>% | 样品量   | 类型   |
|-----|-------------|------|-----------|----------------|------------|-------|------|
| 1   | 20.76       | n.a. | 69.335    | 43.044         | 51.35      | n.a.  | BM * |
| 2   | 22.65       | n.a. | 72.935    | 40.781         | 48.65      | n.a.  | MB*  |
| 总和: |             |      | 142.269   | 83.825         | 100.00     | 0.000 |      |

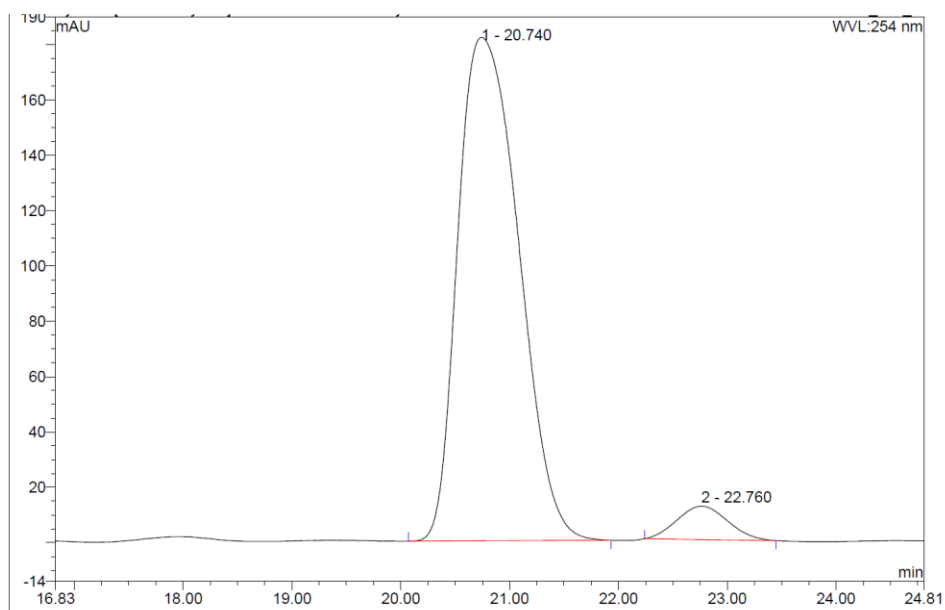

| 序号  | 保留时间<br>min | 峰名称  | 峰高<br>mAU | 峰面积<br>mAU*min | 相对峰面积<br>% | 样品量   | 类型   |
|-----|-------------|------|-----------|----------------|------------|-------|------|
| 1   | 20.74       | n.a. | 181.995   | 117.933        | 94.77      | n.a.  | BMB* |
| 2   | 22.76       | n.a. | 12.079    | 6.512          | 5.23       | n.a.  | BMB* |
| 总和: |             |      | 194.075   | 124.445        | 100.00     | 0.000 |      |

5) (4R,5S,6S)-ethyl

5-formyl-2-(4-nitrophenyl)-4-phenyl-4,5,6,7-tetrahydrobenzofuran-6-carboxylate (4e)

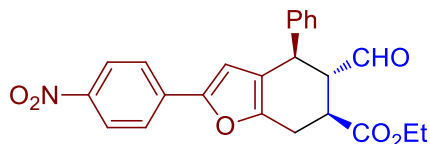

In a dried glass tube, a mixture of  $\text{PtCl}_4$  (5 mol%), pyridine *N*-oxide (10 mol%), (2S)-2-[Bis[3,5-bis(trifluoromethyl)phenyl]-[(trimethylsilyl)oxy]methyl]pyrrolidine (**3c**, 20 mol%),  $\text{TsOH} \cdot \text{H}_2\text{O}$  (20 mol%), **1e** (58.2 mg, 0.2 mmol) and **2a** (128 mg, 1.0 mmol) was mixed in  $\text{PhCH}_3$  (2 mL), stirring at 60 °C until the reaction was complete (12 h). The mixture was passed through a short silica gel column and then concentrated under reduced pressure. The residue was purified by column chromatography. **4e** (47.2 mg, 56%) was obtained as a solid.

$^1\text{H}$  NMR (400 MHz,  $\text{CDCl}_3$ )  $\delta$  9.72 (s, 1H), 8.20 (d,  $J = 9.2$  Hz, 2H), 7.68 (d,  $J = 9.2$  Hz, 2H), 7.41 – 7.28 (m, 3H), 7.25 – 7.18 (m, 2H), 6.43 (s, 1H), 4.19 – 4.04 (m, 2H), 3.95 (dq,  $J = 10.8, 7.2$  Hz, 1H), 3.42 – 3.26 (m, 2H), 3.19 (dd,  $J = 16.8, 5.2$  Hz, 1H), 3.14 – 3.05 (m, 1H), 1.19 (t,  $J = 7.2$  Hz, 3H)

$^{13}\text{C}$  NMR (101 MHz,  $\text{CDCl}_3$ )  $\delta$  202.5, 172.9, 151.2, 150.6, 146.2, 140.6, 136.3, 129.0, 128.4, 127.7, 124.3, 123.5, 122.0, 109.2, 61.4, 55.5, 41.1, 40.7, 25.2, 14.0

**HRMS** (ESI,  $m/z$ ):  $[\text{M}+\text{Na}]^+$  calcd. for  $\text{C}_{24}\text{H}_{21}\text{NNaO}_6$  442.1261, found 442.1262

**HPLC analysis:** 90% ee (Chiralpak OD-H column, hexane/*i*-PrOH = 80/20, flow rate 0.8 mL/min, UV detection at 254 nm),  $R_t$  (minor) = 18.95 min;  $R_t$  (major) = 26.80 min

$[\alpha]_{\text{D}}^{20} = -36.0$  ( $c = 0.50$ ,  $\text{CHCl}_3$ )

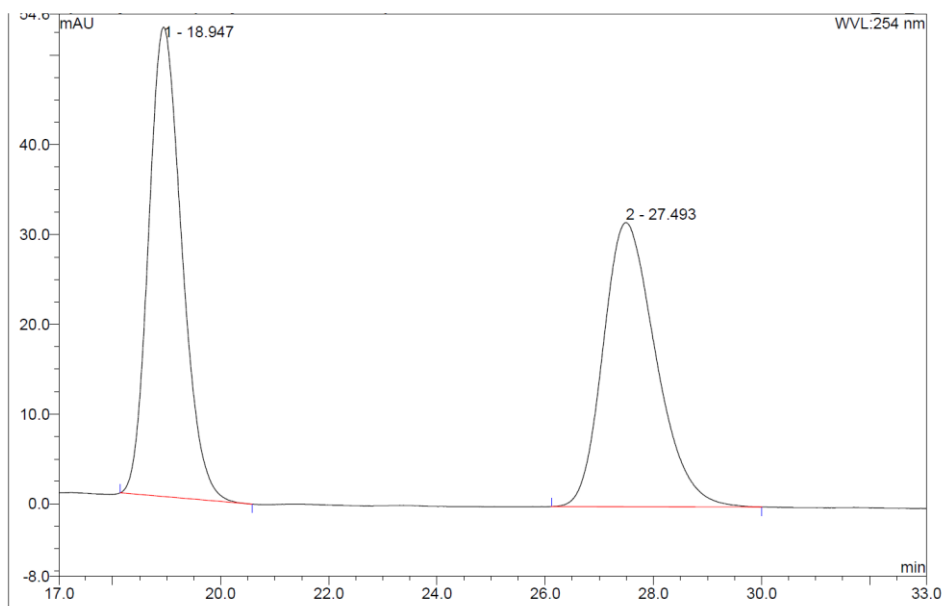

| 序号  | 保留时间<br>min | 峰名称  | 峰高<br>mAU | 峰面积<br>mAU*min | 相对峰面积<br>% | 样品量   | 类型   |
|-----|-------------|------|-----------|----------------|------------|-------|------|
| 1   | 18.95       | n.a. | 52.290    | 37.203         | 50.98      | n.a.  | BMB* |
| 2   | 27.49       | n.a. | 31.642    | 35.771         | 49.02      | n.a.  | BMB* |
| 总和: |             |      | 83.932    | 72.974         | 100.00     | 0.000 |      |

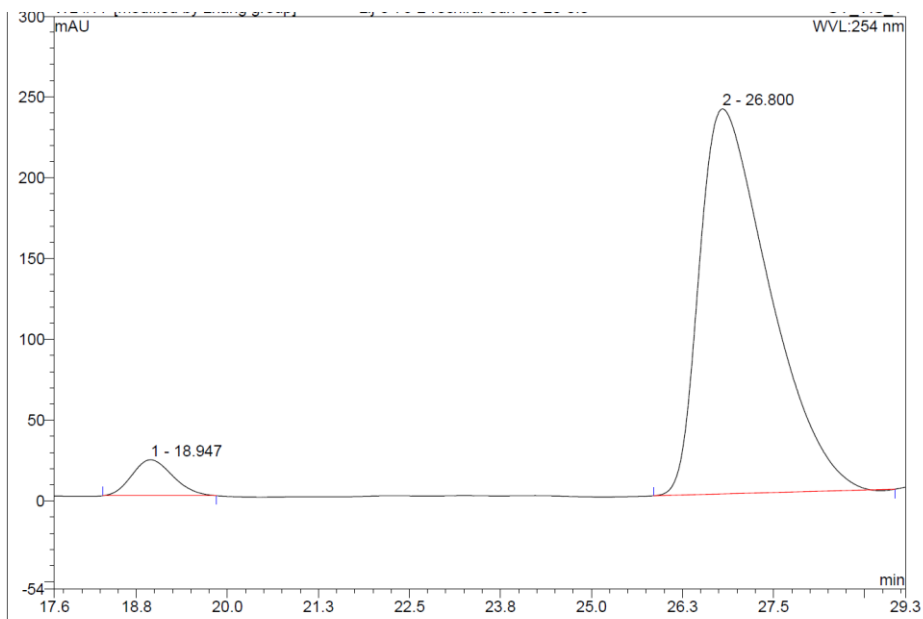

| No.    | Ret.Time<br>min | Peak Name | Height<br>mAU | Area<br>mAU*min | Rel.Area<br>% | Amount | Type |
|--------|-----------------|-----------|---------------|-----------------|---------------|--------|------|
| 1      | 18.95           | n.a.      | 22.241        | 14.482          | 5.17          | n.a.   | BMB* |
| 2      | 26.80           | n.a.      | 238.157       | 265.530         | 94.83         | n.a.   | BMB* |
| Total: |                 |           | 260.398       | 280.012         | 100.00        | 0.000  |      |

**6) (4R,5S,6S)-ethyl**

**5-formyl-2-(naphthalen-1-yl)-4-phenyl-4,5,6,7-tetrahydrobenzofuran-6-carboxylate (4f)**

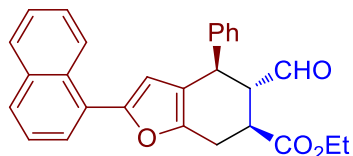

In a dried glass tube, a mixture of  $\text{PtCl}_4$  (5 mol%), pyridine *N*-oxide (10 mol%), (2S)-2-[Bis[3,5-bis(trifluoromethyl)phenyl]-[(trimethylsilyl)oxy]methyl]pyrrolidine (**3c**, 20 mol%),  $\text{TsOH} \cdot \text{H}_2\text{O}$  (20 mol%), **1f** (59.2 mg, 0.2 mmol) and **2a** (128 mg, 1.0 mmol) was mixed in  $\text{PhCH}_3$  (2 mL), stirring at 60 °C until the reaction was complete (12 h). The mixture was passed through a short silica gel column and then concentrated under reduced pressure. The residue was purified by column chromatography. **4f** (40.4 mg, 48%) was obtained as a solid.

$^1\text{H}$  NMR (400 MHz,  $\text{CDCl}_3$ )  $\delta$  9.75 (s, 1H), 8.39 – 8.28 (m, 1H), 7.85 (dd,  $J$  = 6.8, 2.8 Hz, 1H), 7.79 (d,  $J$  = 8.0 Hz, 1H), 7.72 – 7.64 (m, 1H), 7.51 – 7.43 (m, 3H), 7.39 – 7.31 (m, 2H), 7.32 – 7.21 (m, 3H), 6.27 (s, 1H), 4.21 – 4.05 (m, 2H), 3.98 (dq,  $J$  = 10.8, 7.2 Hz, 1H), 3.43 – 3.30 (m, 2H), 3.24 (dd,  $J$  = 17.6, 4.8 Hz, 1H), 3.12 (ddd,  $J$  = 9.6, 8.8, 5.6 Hz, 1H), 1.20 (t,  $J$  = 7.1 Hz, 3H)

$^{13}\text{C}$  NMR (100 MHz,  $\text{CDCl}_3$ )  $\delta$  203.1, 173.3, 152.8, 148.3, 141.1, 134.0, 130.1, 128.8, 128.6, 128.5, 128.3, 127.5, 126.6, 125.9, 125.8, 125.4, 125.3, 120.7, 109.3, 61.3, 55.9, 41.5, 41.0, 25.4, 14.0

**HRMS** (ESI,  $m/z$ ):  $[\text{M}+\text{Na}]^+$  calcd. for  $\text{C}_{28}\text{H}_{24}\text{NaO}_4$  447.1567, found 447.1567

**HPLC analysis:** 98% ee (Chiralpak IC column, hexane/*i*-PrOH = 90/10, flow rate 0.5 mL/min, UV detection at 254 nm),  $R_t$  (minor) = 18.43 min;  $R_t$  (major) = 19.28 min

$[\alpha]_{\text{D}}^{20}$  = -21.8 ( $c$  = 1.0,  $\text{CHCl}_3$ )

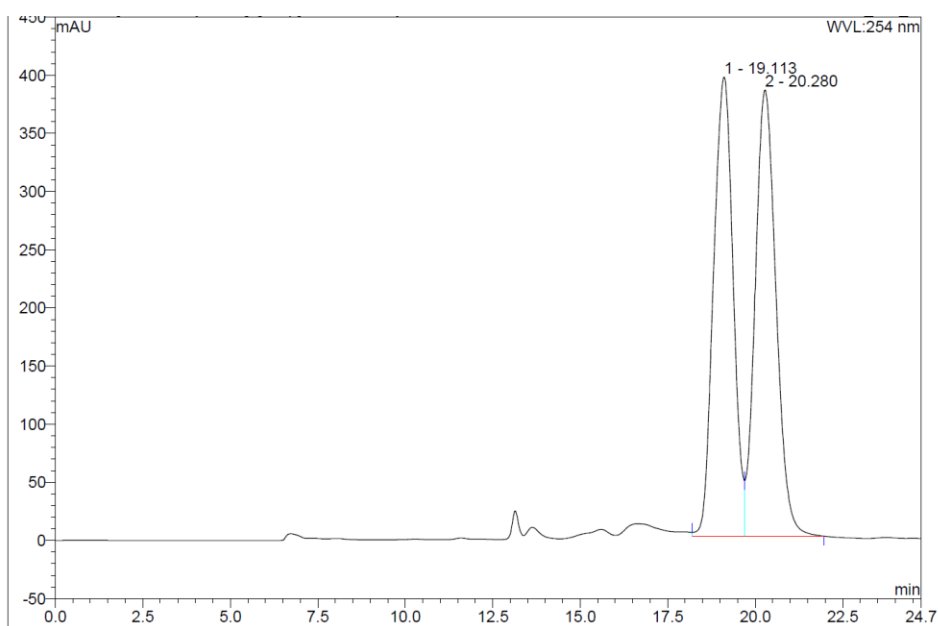

| No.    | Ret.Time<br>min | Peak Name | Height<br>mAU | Area<br>mAU*min | Rel.Area<br>% | Amount | Type |
|--------|-----------------|-----------|---------------|-----------------|---------------|--------|------|
| 1      | 19.11           | n.a.      | 394.604       | 255.021         | 49.05         | n.a.   | M *  |
| 2      | 20.28           | n.a.      | 383.666       | 264.898         | 50.95         | n.a.   | MB*  |
| Total: |                 |           | 778.270       | 519.919         | 100.00        | 0.000  |      |

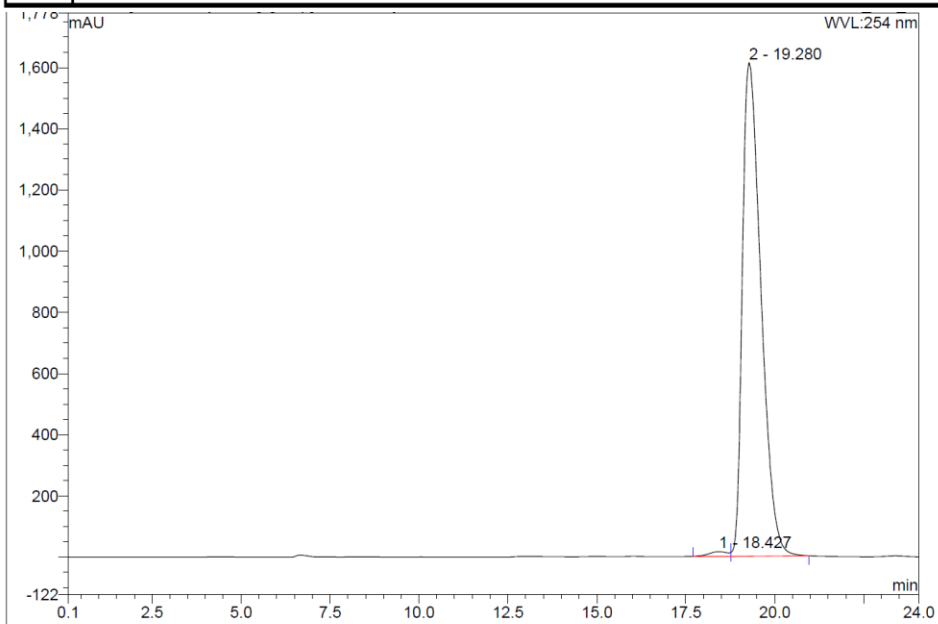

| No.    | Ret.Time<br>min | Peak Name | Height<br>mAU | Area<br>mAU*min | Rel.Area<br>% | Amount | Type |
|--------|-----------------|-----------|---------------|-----------------|---------------|--------|------|
| 1      | 18.43           | n.a.      | 15.343        | 9.441           | 0.96          | n.a.   | BM * |
| 2      | 19.28           | n.a.      | 1612.982      | 976.853         | 99.04         | n.a.   | MB*  |
| Total: |                 |           | 1628.325      | 986.294         | 100.00        | 0.000  |      |

7) (4R,5S,6S)-ethyl

4-(4-chlorophenyl)-5-formyl-2-phenyl-4,5,6,7-tetrahydrobenzofuran-6-carboxylate (**4g**)

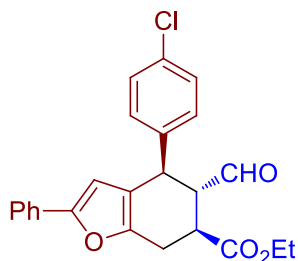

In a dried glass tube, a mixture of  $\text{PtCl}_4$  (5 mol%), pyridine *N*-oxide (10 mol%), (2S)-2-[Bis[3,5-bis(trifluoromethyl)phenyl]-[(trimethylsilyl)oxy]methyl]pyrrolidine (**3c**, 20 mol%),  $\text{TsOH} \cdot \text{H}_2\text{O}$  (20 mol%), **1g** (56.0 mg, 0.2 mmol) and **2a** (128 mg, 1.0 mmol) was mixed in  $\text{PhCH}_3$  (2 mL), stirring at 60 °C until the reaction was complete (12 h). The mixture was passed through a short silica gel column and then concentrated under reduced pressure. The residue was purified by column chromatography. **4g** (38.6 mg, 47 %) was obtained as a solid.

$^1\text{H}$  NMR (400 MHz,  $\text{CDCl}_3$ )  $\delta$  9.71 (d,  $J$  = 0.8 Hz, 1H), 7.56 (d,  $J$  = 7.2 Hz, 2H), 7.37 – 7.28 (m, 4H), 7.22 (t,  $J$  = 7.2 Hz, 1H), 7.16 (d,  $J$  = 8.4 Hz, 2H), 6.15 (s, 1H), 4.16 – 4.04 (m, 2H), 3.99 (dq,  $J$  = 10.8, 7.2 Hz, 1H), 3.36 – 3.20 (m, 2H), 3.21 – 3.12 (m, 1H), 3.10 – 3.00 (m, 1H), 1.20 (t,  $J$  = 7.1 Hz, 3H)

$^{13}\text{C}$  NMR (100 MHz,  $\text{CDCl}_3$ )  $\delta$  202.5, 173.0, 153.5, 148.0, 139.7, 133.2, 130.6, 129.9, 129.0, 128.7, 127.4, 123.5, 120.5, 104.8, 61.3, 55.7, 41.0, 40.7, 25.2, 14.0

**HRMS** (ESI,  $m/z$ ):  $[\text{M}+\text{Na}]^+$  calcd. for  $\text{C}_{24}\text{H}_{21}\text{ClNaO}_4$  431.1021, found 431.1028

**HPLC analysis:** 90% ee (Chiralpak AD-H column, hexane/*i*-PrOH = 90/10, flow rate 0.5 mL/min, UV detection at 254 nm),  $R_t$  (major) = 19.17 min,  $R_t$  (minor) = 21.68 min

$[\alpha]_{\text{D}}^{20}$  = -13.7 ( $c$  = 0.50,  $\text{CHCl}_3$ )

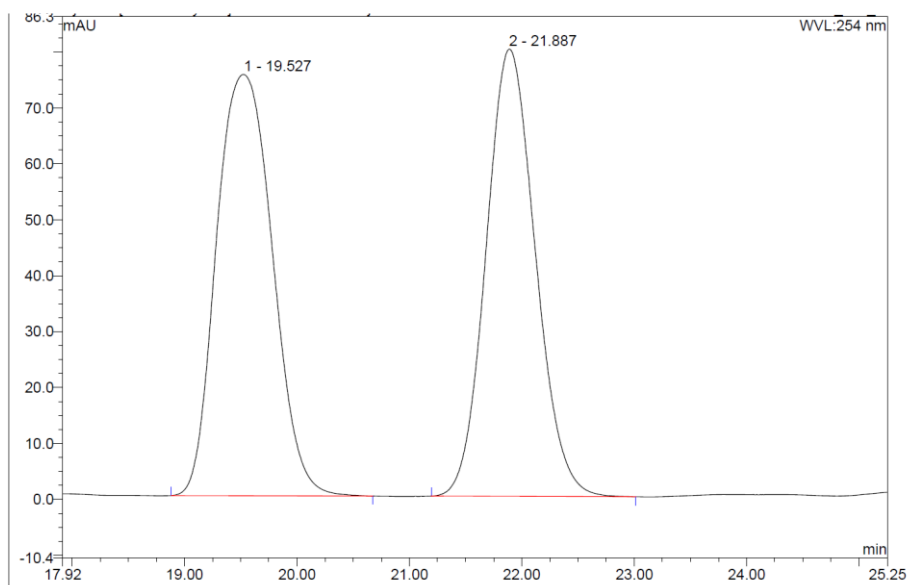

| 序号  | 保留时间<br>min | 峰名称  | 峰高<br>mAU | 峰面积<br>mAU*min | 相对峰面积<br>% | 样品量   | 类型   |
|-----|-------------|------|-----------|----------------|------------|-------|------|
| 1   | 19.53       | n.a. | 75.322    | 43.517         | 51.70      | n.a.  | BMB* |
| 2   | 21.89       | n.a. | 79.945    | 40.659         | 48.30      | n.a.  | BMB* |
| 总和: |             |      | 155.266   | 84.176         | 100.00     | 0.000 |      |

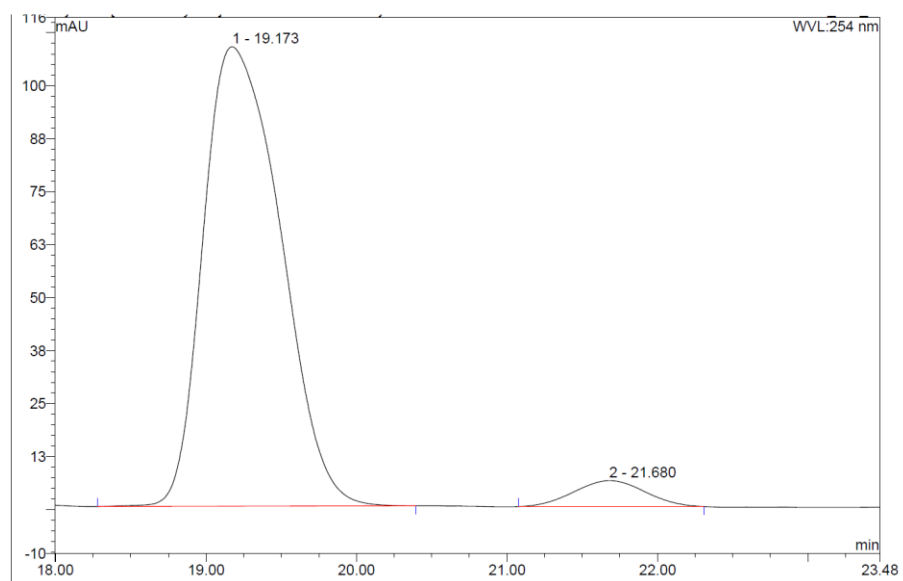

| 序号  | 保留时间<br>min | 峰名称  | 峰高<br>mAU | 峰面积<br>mAU*min | 相对峰面积<br>% | 样品量   | 类型   |
|-----|-------------|------|-----------|----------------|------------|-------|------|
| 1   | 19.17       | n.a. | 108.436   | 64.687         | 95.09      | n.a.  | BMB  |
| 2   | 21.68       | n.a. | 6.113     | 3.338          | 4.91       | n.a.  | BMB* |
| 总和: |             |      | 114.548   | 68.026         | 100.00     | 0.000 |      |

8) (4R,5S,6S)-ethyl

5-formyl-4-(4-methoxyphenyl)-2-phenyl-4,5,6,7-tetrahydrobenzofuran-6-carboxylate (**4h**)

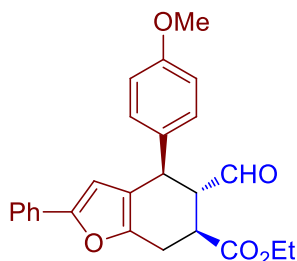

In a dried glass tube, a mixture of  $\text{PtCl}_4$  (5 mol%), pyridine *N*-oxide (10 mol%), (2S)-2-[Bis[3,5-bis(trifluoromethyl)phenyl]-[(trimethylsilyl)oxy]methyl]pyrrolidine (**3c**, 20 mol%),  $\text{TsOH} \cdot \text{H}_2\text{O}$  (20 mol%), **1h** (55.2 mg, 0.2 mmol) and **2a** (128 mg, 1.0 mmol) was mixed in  $\text{PhCH}_3$  (2 mL), stirring at 60 °C until the reaction was complete (12 h). The mixture was passed through a short silica gel column and then concentrated under reduced pressure. The residue was purified by column chromatography. **4h** (53.2 mg, 65 %) was obtained as a solid.

$^1\text{H}$  NMR (500 MHz,  $\text{CDCl}_3$ )  $\delta$  9.71 (d,  $J$  = 0.5 Hz, 1H), 7.56-7.54 (m, 2H), 7.32 (t,  $J$  = 8.0 Hz, 2H), 7.23 – 7.18 (m, 1H), 7.14 (d,  $J$  = 8.5 Hz, 2H), 6.87 (d,  $J$  = 8.5 Hz, 2H), 6.18 (s, 1H), 4.17 – 4.09 (m, 1H), 4.06 – 3.97 (m, 2H), 3.80 (s, 3H), 3.32 – 3.23 (m, 2H), 3.20 – 3.11 (m, 1H), 3.03 (ddd,  $J$  = 12.0, 1.0, 3.5 Hz, 1H), 1.21 (t,  $J$  = 7.0 Hz, 3H)

$^{13}\text{C}$  NMR (125 MHz,  $\text{CDCl}_3$ )  $\delta$  203.3, 173.3, 158.9, 153.3, 147.8, 132.9, 130.7, 129.5, 128.6, 127.2, 123.4, 121.4, 114.2, 105.0, 61.2, 56.0, 55.3, 41.1, 40.7, 25.4, 14.0

**HRMS** (ESI,  $m/z$ ):  $[\text{M}+\text{H}]^+$  calcd. for  $\text{C}_{25}\text{H}_{25}\text{O}_5$  405.1697, found 405.1696

**HPLC analysis:** 93% ee (Chiralpak AD-H column, hexane/*i*-PrOH = 90/10, flow rate 0.5 mL/min, UV detection at 254 nm),  $R_t$  (major) = 21.87 min;  $R_t$  (minor) = 23.34 min

$[\alpha]_{\text{D}}^{20}$  = - 10.4 ( $c$  = 1.0,  $\text{CHCl}_3$ )

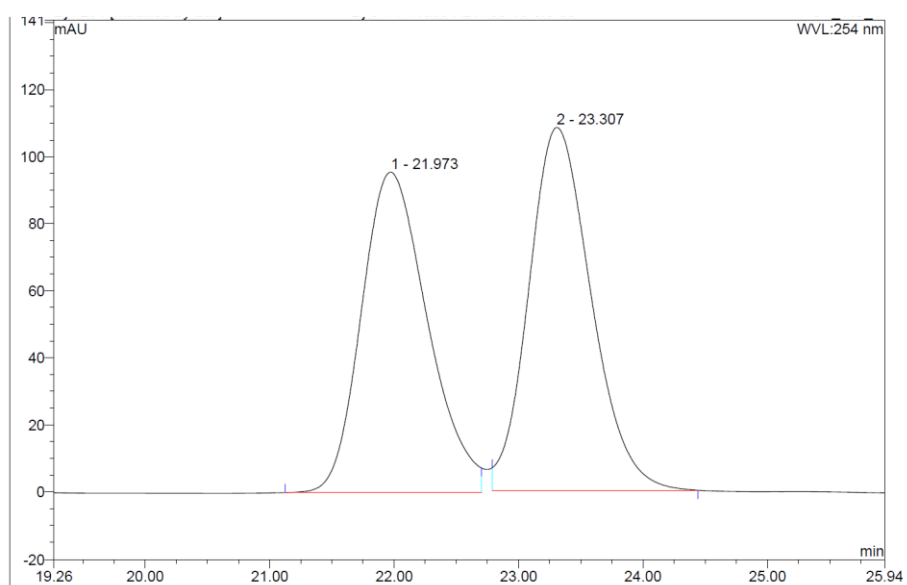

| 序号  | 保留时间<br>min | 峰名称  | 峰高<br>mAU | 峰面积<br>mAU*min | 相对峰面积<br>% | 样品量   | 类型   |
|-----|-------------|------|-----------|----------------|------------|-------|------|
| 1   | 21.97       | n.a. | 95.586    | 58.738         | 48.29      | n.a.  | BM * |
| 2   | 23.31       | n.a. | 108.277   | 62.908         | 51.71      | n.a.  | MB*  |
| 总和: |             |      | 203.862   | 121.646        | 100.00     | 0.000 |      |

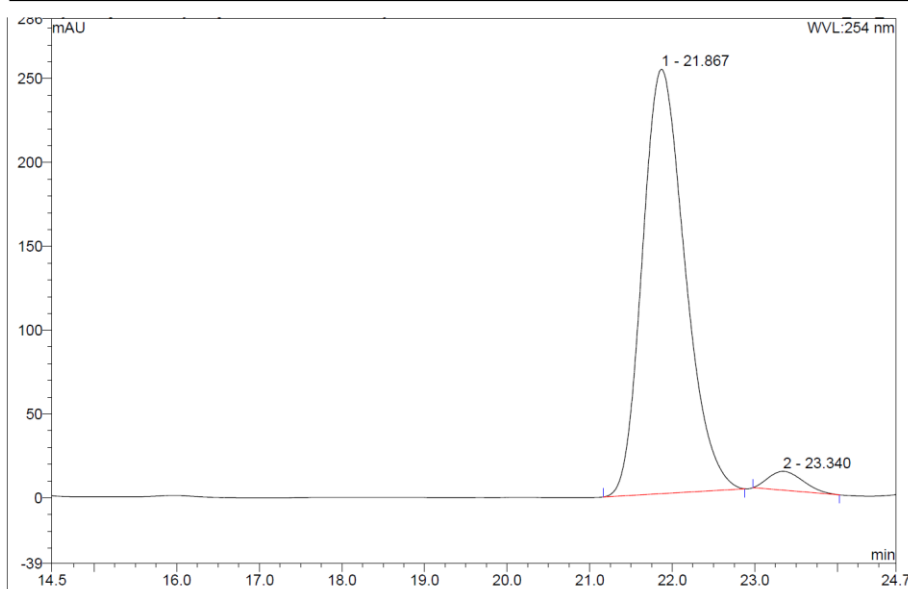

| 序号  | 保留时间<br>min | 峰名称  | 峰高<br>mAU | 峰面积<br>mAU*min | 相对峰面积<br>% | 样品量   | 类型   |
|-----|-------------|------|-----------|----------------|------------|-------|------|
| 1   | 21.87       | n.a. | 253.015   | 151.336        | 96.54      | n.a.  | BMB* |
| 2   | 23.34       | n.a. | 11.173    | 5.430          | 3.46       | n.a.  | BMB* |
| 总和: |             |      | 264.188   | 156.765        | 100.00     | 0.000 |      |

9) (4R,5S,6S)-ethyl

4-(4-chlorophenyl)-5-formyl-2-(p-tolyl)-4,5,6,7-tetrahydrobenzofuran-6-carboxylate (**4i**)

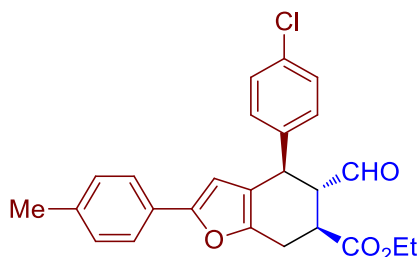

In a dried glass tube, a mixture of  $\text{PtCl}_4$  (5 mol%), pyridine *N*-oxide (10 mol%), (2S)-2-[Bis[3,5-bis(trifluoromethyl)phenyl]-[(trimethylsilyl)oxy]methyl]pyrrolidine (**3c**, 20 mol%),  $\text{TsOH} \cdot \text{H}_2\text{O}$  (20 mol%), **1i** (58.8 mg, 0.2 mmol) and **2a** (128 mg, 1.0 mmol) was mixed in  $\text{PhCH}_3$  (2 mL), stirring at 60 °C until the reaction was complete (12 h). The mixture was passed through a short silica gel column and then concentrated under reduced pressure. The residue was purified by column chromatography. **4i** (52.4 mg, 62%) was obtained as a solid.

$^1\text{H}$  NMR (500 MHz,  $\text{CDCl}_3$ )  $\delta$  9.71 (d,  $J$  = 1.0 Hz, 1H), 7.45 (d,  $J$  = 8.2 Hz, 2H), 7.31 (d,  $J$  = 8.5 Hz, 2H), 7.17-7.14 (m, 4H), 6.09 (s, 1H), 4.18 – 4.05 (m, 2H), 3.99 (dq,  $J$  = 11.0, 7.0 Hz, 1H), 3.35 – 3.20 (m, 2H), 3.19 – 3.10 (m, 1H), 3.04 (ddd,  $J$  = 11.5, 9.0, 2.5 Hz, 1H), 2.34 (s, 3H), 1.20 (t,  $J$  = 7.0 Hz, 3H)

$^{13}\text{C}$  NMR (125 MHz,  $\text{CDCl}_3$ )  $\delta$  202.6, 173.1, 153.7, 147.6, 139.7, 137.2, 133.2, 129.9, 129.3, 128.9, 127.9, 123.4, 120.3, 104.0, 61.3, 55.7, 41.0, 40.7, 25.2, 21.2, 14.0

**HRMS**: calcd. for  $\text{C}_{25}\text{H}_{23}\text{ClO}_4$  422.1285, found: 422.1292

**HPLC analysis**: 95% ee (Chiralpak AD-H column, hexane/*i*-PrOH = 95/5, flow rate 0.5 mL/min, UV detection at 254 nm),  $R_t$  (major) = 24.07 min;  $R_t$  (minor) = 26.13 min

$[\alpha]_{\text{D}}^{20}$  = - 20.0 ( $c$  = 0.60,  $\text{CHCl}_3$ )

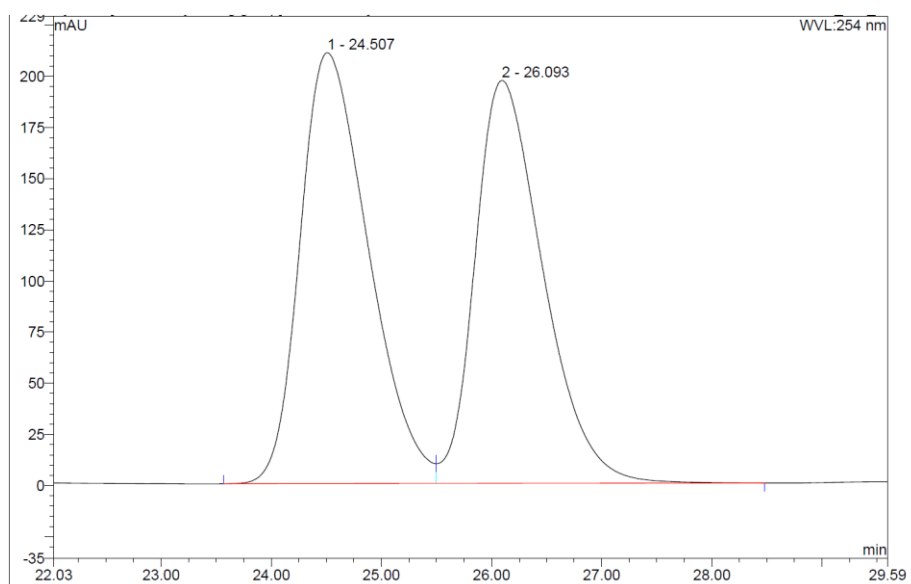

| 序号  | 保留时间<br>min | 峰名称  | 峰高<br>mAU | 峰面积<br>mAU*min | 相对峰面积<br>% | 样品量   | 类型 |
|-----|-------------|------|-----------|----------------|------------|-------|----|
| 1   | 24.51       | n.a. | 210.547   | 151.508        | 51.84      | n.a.  | BM |
| 2   | 26.09       | n.a. | 196.927   | 140.777        | 48.16      | n.a.  | MB |
| 总和: |             |      | 407.473   | 292.285        | 100.00     | 0.000 |    |

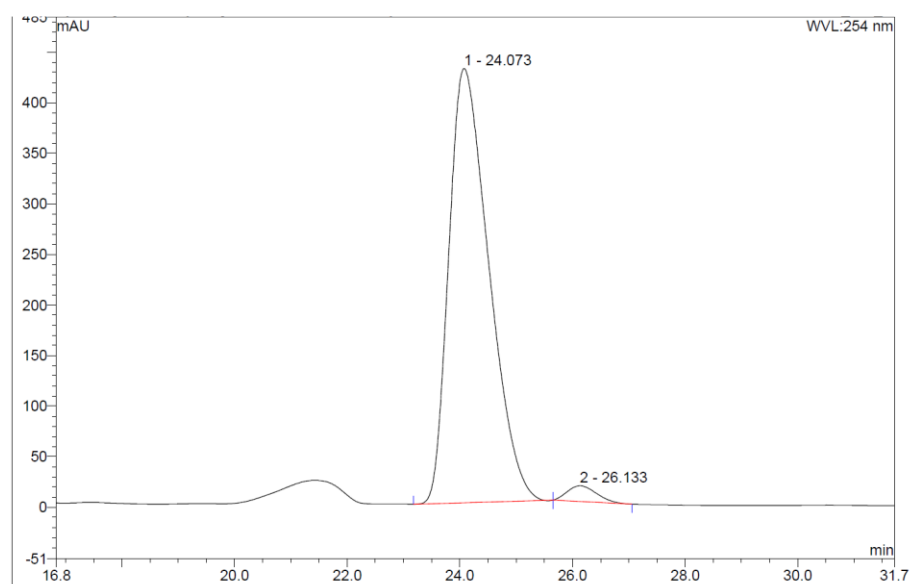

| 序号  | 保留时间<br>min | 峰名称  | 峰高<br>mAU | 峰面积<br>mAU*min | 相对峰面积<br>% | 样品量   | 类型   |
|-----|-------------|------|-----------|----------------|------------|-------|------|
| 1   | 24.07       | n.a. | 429.388   | 353.064        | 97.42      | n.a.  | BMb* |
| 2   | 26.13       | n.a. | 15.508    | 9.338          | 2.58       | n.a.  | bMB* |
| 总和: |             |      | 444.896   | 362.402        | 100.00     | 0.000 |      |

## 10) (4R,5S,6S)-ethyl

### 5-formyl-2,4-bis(4-methoxyphenyl)-4,5,6,7-tetrahydrobenzofuran-6-carboxylate (4j)

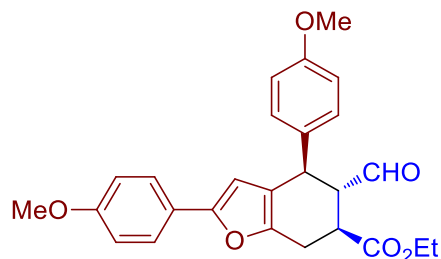

In a dried glass tube, a mixture of  $\text{PtCl}_4$  (5 mol%), pyridine *N*-oxide (10 mol%), (2S)-2-[Bis[3,5-bis(trifluoromethyl)phenyl]-[(trimethylsilyl)oxy]methyl]pyrrolidine (**3c**, 20 mol%),  $\text{TsOH} \cdot \text{H}_2\text{O}$  (20 mol%), **1j** (61.2 mg, 0.2 mmol) and **2a** (128 mg, 1.0 mmol) was mixed in  $\text{PhCH}_3$  (2 mL), stirring at 60 °C until the reaction was complete (12 h). The mixture was passed through a short silica gel column and then concentrated under reduced pressure. The residue was purified by column chromatography. **4j** (48.3 mg, 56%) was obtained as a solid.

$^1\text{H}$  NMR (500 MHz,  $\text{CDCl}_3$ )  $\delta$  9.70 (s, 1H), 7.48 (d,  $J = 9.0$  Hz, 2H), 7.14 (d,  $J = 9.0$  Hz, 2H), 6.92 – 6.78 (m, 4H), 6.04 (s, 1H), 4.11 (dq,  $J = 11.0, 7.0$  Hz, 1H), 4.02 (dq,  $J = 11.0, 7.0$  Hz, 2H), 3.81 (s, 3H), 3.81 (s, 3H), 3.32 – 3.23 (m, 2H), 3.19 – 3.12 (m, 1H), 3.02 (ddd,  $J = 16.0, 8.5, 6.0$  Hz, 1H), 1.21 (t,  $J = 7.0$  Hz, 3H).

$^{13}\text{C}$  NMR (125 MHz,  $\text{CDCl}_3$ )  $\delta$  203.4, 173.4, 158.9, 158.8, 153.3, 147.0, 133.0, 129.5, 124.88, 123.8, 121.2, 114.1, 114.1, 103.4, 61.2, 56.0, 55.3, 41.1, 40.8, 25.4, 14.0

**MS** (EI)  $m/z$  (%): 434 ( $\text{M}^+$ , 3.36); 135 (100); **HRMS**: calcd. for  $\text{C}_{26}\text{H}_{26}\text{O}_6$  434.1729, found 434.1730

**HPLC analysis**: 90% ee (Chiralpak AS-H column, hexane/*i*-PrOH = 90/10, flow rate 1.0 mL/min, UV detection at 254 nm),  $R_t$  (minor) = 16.29 min;  $R_t$  (major) = 22.11 min

$[\alpha]_{\text{D}}^{20} = -10.7$  ( $c = 0.60$ ,  $\text{CHCl}_3$ )

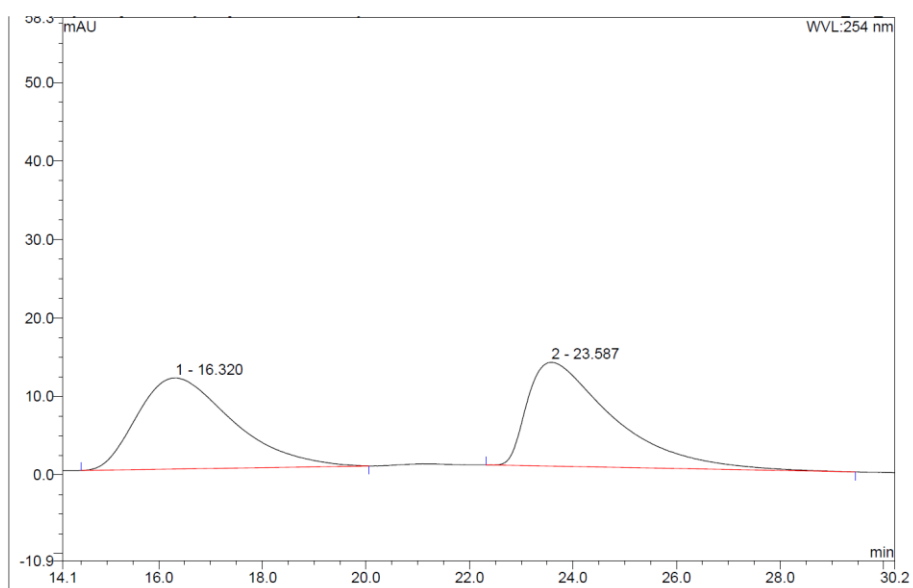

| 序号  | 保留时间<br>min | 峰名称  | 峰高<br>mAU | 峰面积<br>mAU*min | 相对峰面积<br>% | 样品量   | 类型   |
|-----|-------------|------|-----------|----------------|------------|-------|------|
| 1   | 16.32       | n.a. | 11.609    | 24.806         | 49.46      | n.a.  | BMB* |
| 2   | 23.59       | n.a. | 13.242    | 25.352         | 50.54      | n.a.  | BMB* |
| 总和: |             |      | 24.851    | 50.158         | 100.00     | 0.000 |      |

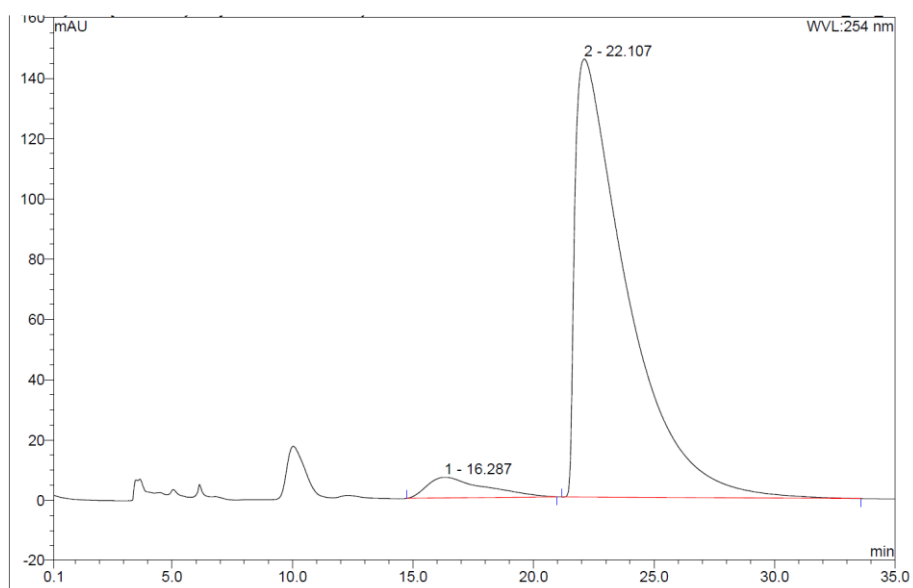

| 序号  | 保留时间<br>min | 峰名称  | 峰高<br>mAU | 峰面积<br>mAU*min | 相对峰面积<br>% | 样品量   | 类型   |
|-----|-------------|------|-----------|----------------|------------|-------|------|
| 1   | 16.29       | n.a. | 6.860     | 18.863         | 4.95       | n.a.  | BMB* |
| 2   | 22.11       | n.a. | 145.311   | 362.504        | 95.05      | n.a.  | BMB* |
| 总和: |             |      | 152.171   | 381.368        | 100.00     | 0.000 |      |

## 11) (4S,5S,6S)-ethyl

### 2-butyl-5-formyl-4-((E)-styryl)-4,5,6,7-tetrahydrobenzofuran-6-carboxylate

(4k)

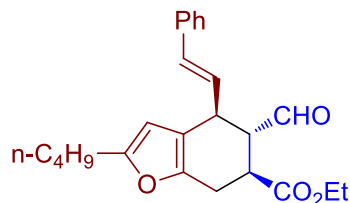

In a dried glass tube, a mixture of  $\text{PtCl}_4$  (5 mol%), pyridine *N*-oxide (10 mol%), (2S)-2-[Bis[3,5-bis(trifluoromethyl)phenyl]-[(trimethylsilyl)oxy]methyl]pyrrolidine (**3c**, 20 mol%),  $\text{TsOH} \cdot \text{H}_2\text{O}$  (20 mol%), **1k** (50.4 mg, 0.2 mmol) and **2a** (128 mg, 1.0 mmol) was mixed in  $\text{PhCH}_3$  (2 mL), stirring at 60 °C until the reaction was complete (12 h). The mixture was passed through a short silica gel column and then concentrated under reduced pressure. The residue was purified by column chromatography. **4k** (35.1 mg, 46%) was obtained as a solid.

$^1\text{H}$  NMR (500 MHz,  $\text{CDCl}_3$ )  $\delta$  9.87 (d,  $J$  = 1.5 Hz, 1H), 7.39 – 7.34 (m, 2H), 7.31 (dd,  $J$  = 8.0, 7.0 Hz, 2H), 7.25 – 7.21 (m, 1H), 6.50 (d,  $J$  = 15.5 Hz, 1H), 6.15 (dd,  $J$  = 15.5, 8.5 Hz, 1H), 5.80 (s, 1H), 4.22 – 3.99 (m, 2H), 3.60 (t,  $J$  = 9.0 Hz, 1H), 3.18 (td,  $J$  = 1.0, 6.0 Hz, 1H), 3.10 – 3.04 (m, 1H), 2.98 (dd,  $J$  = 16.5, 6.0 Hz, 1H), 2.84 (ddd,  $J$  = 16.5, 9.5, 2.5 Hz, 1H), 2.55 (t,  $J$  = 7.5 Hz, 2H), 1.62 – 1.52 (m, 2H), 1.36 (dq,  $J$  = 14.5, 7.5 Hz, 2H), 1.23 (t,  $J$  = 7.0 Hz, 3H), 0.91 (t,  $J$  = 7.5 Hz, 3H)

$^{13}\text{C}$  NMR (126 MHz,  $\text{CDCl}_3$ )  $\delta$  203.1, 173.6, 156.0, 145.5, 136.6, 132.5, 129.6, 128.6, 127.7, 126.4, 118.0, 104.6, 61.2, 53.5, 40.5, 39.0, 30.2, 27.8, 25.1, 22.3, 14.1, 13.8

**MS** (EI)  $m/z$  (%): 380 ( $\text{M}^+$ , 70.93); 289 (100); **HRMS**: calcd. for  $\text{C}_{24}\text{H}_{28}\text{O}_4$  380.1988, found: 380.1984.

**HPLC analysis**: 92% ee (Chiralpak AD-H column, hexane/*i*-PrOH = 95/5, flow rate 0.5 mL/min, UV detection at 254 nm),  $R_t$  (minor) = 9.61 min;  $R_t$  (major) = 10.66 min

$[\alpha]_{\text{D}}^{20}$  = -15.6 ( $c$  = 0.50,  $\text{CHCl}_3$ )

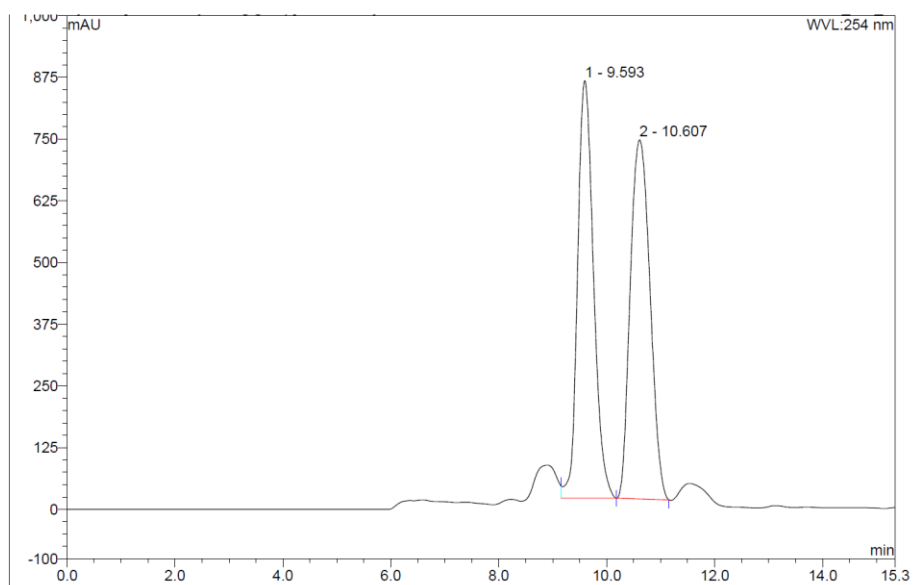

| 序号  | 保留时间<br>min | 峰名称  | 峰高<br>mAU | 峰面积<br>mAU*min | 相对峰面积<br>% | 样品量   | 类型   |
|-----|-------------|------|-----------|----------------|------------|-------|------|
| 1   | 9.59        | n.a. | 845.987   | 289.717        | 48.47      | n.a.  | Mb*  |
| 2   | 10.61       | n.a. | 727.405   | 307.982        | 51.53      | n.a.  | bMB* |
| 总和: |             |      | 1573.392  | 597.700        | 100.00     | 0.000 |      |

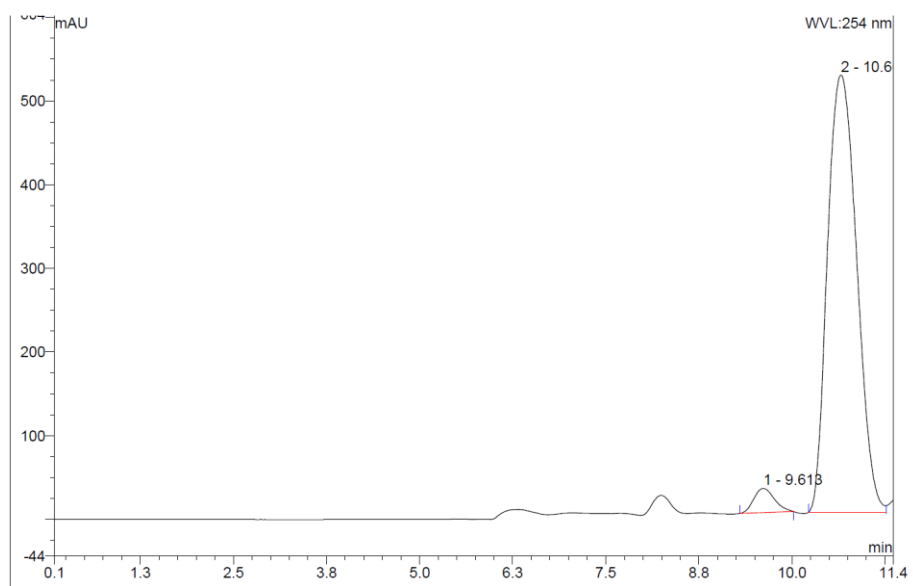

| 序号  | 保留时间<br>min | 峰名称  | 峰高<br>mAU | 峰面积<br>mAU*min | 相对峰面积<br>% | 样品量   | 类型   |
|-----|-------------|------|-----------|----------------|------------|-------|------|
| 1   | 9.61        | n.a. | 28.970    | 9.303          | 3.76       | n.a.  | BMB* |
| 2   | 10.66       | n.a. | 522.724   | 238.191        | 96.24      | n.a.  | BM * |
| 总和: |             |      | 551.694   | 247.493        | 100.00     | 0.000 |      |

**12) (4R,5S,6S)-methyl 5-formyl-2,4-diphenyl-4,5,6,7-tetrahydrobenzofuran-6-carboxylate (4I)**

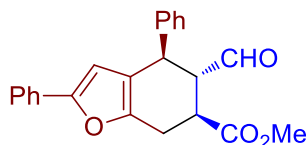

In a dried glass tube, a mixture of  $\text{PtCl}_4$  (5 mol%), pyridine *N*-oxide (10 mol%), (2S)-2-[Bis[3,5-bis(trifluoromethyl)phenyl]-[(trimethylsilyl)oxy]methyl]pyrrolidine (**3c**, 20 mol%),  $\text{TsOH} \cdot \text{H}_2\text{O}$  (20 mol%), **1a** (49.2 mg, 0.2 mmol) and **2b** (114 mg, 1.0 mmol) was mixed in  $\text{PhCH}_3$  (2 mL), stirring at 60 °C until the reaction was complete (24 h). The mixture was passed through a short silica gel column and then concentrated under reduced pressure. The residue was purified by column chromatography. **4I** (34.7 mg, 48%) was obtained as a solid.

$^1\text{H}$  NMR (500 MHz,  $\text{CDCl}_3$ )  $\delta$  9.70 (s, 1H), 7.56 (dd,  $J$  = 8.4, 1.1 Hz, 2H), 7.38 – 7.30 (m, 4H), 7.29 (dt,  $J$  = 9.5, 4.3 Hz, 1H), 7.23 (dd,  $J$  = 5.1, 3.5 Hz, 3H), 6.19 (s, 1H), 4.10 (dd,  $J$  = 6.8, 2.2 Hz, 1H), 3.58 (s, 3H), 3.39 – 3.26 (m, 2H), 3.16 (dd,  $J$  = 17.4, 4.9 Hz, 1H), 3.10 – 3.00 (m, 1H)

$^{13}\text{C}$  NMR (125 MHz,  $\text{CDCl}_3$ )  $\delta$  203.0, 173.8, 153.4, 147.9, 141.0, 130.7, 128.8, 128.6, 128.5, 127.4, 127.3, 123.5, 120.9, 105.0, 55.8, 52.2, 41.3, 40.6, 25.2

**MS**(EI):  $m/z$  (%): 360 ( $\text{M}^+$ , 57.69); 105 (100); **HRMS**: calcd. for  $\text{C}_{23}\text{H}_{20}\text{O}_4$  360.1362, found 360.1359.

**HPLC analysis**: 90% ee (Chiralpak AD-H column, hexane/*i*-PrOH = 90/10, flow rate 0.5 mL/min, UV detection at 254 nm),  $R_t$  (minor) = 16.09 min;  $R_t$  (major) = 20.9 min

$[\alpha]_{\text{D}}^{20}$  = -4.2 ( $c$  = 1.0,  $\text{CHCl}_3$ )

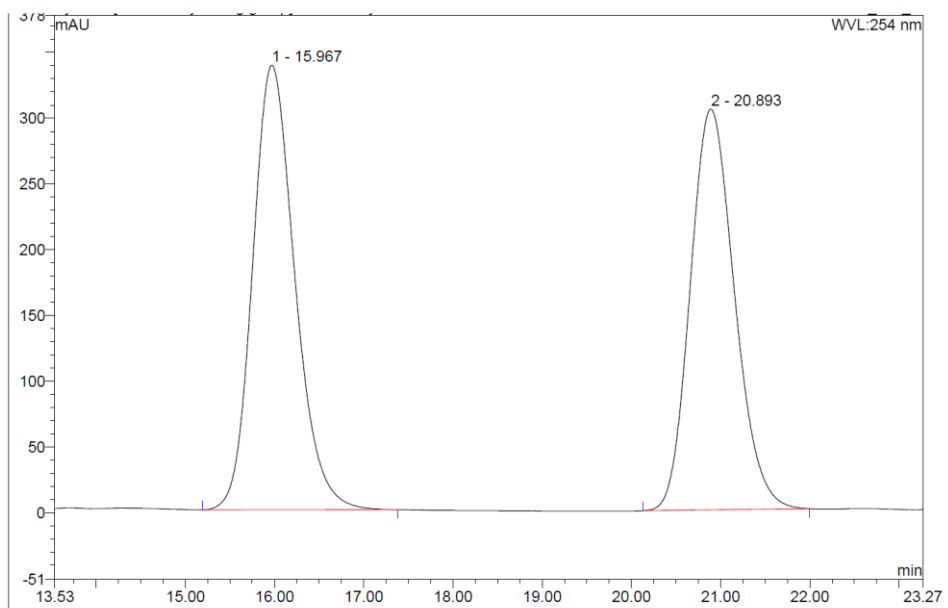

| 序号  | 保留时间<br>min | 峰名称  | 峰高<br>mAU | 峰面积<br>mAU*min | 相对峰面积<br>% | 样品量   | 类型   |
|-----|-------------|------|-----------|----------------|------------|-------|------|
| 1   | 15.97       | n.a. | 338.187   | 185.318        | 51.43      | n.a.  | BMB* |
| 2   | 20.89       | n.a. | 304.893   | 175.012        | 48.57      | n.a.  | BMB* |
| 总和: |             |      | 643.080   | 360.331        | 100.00     | 0.000 |      |

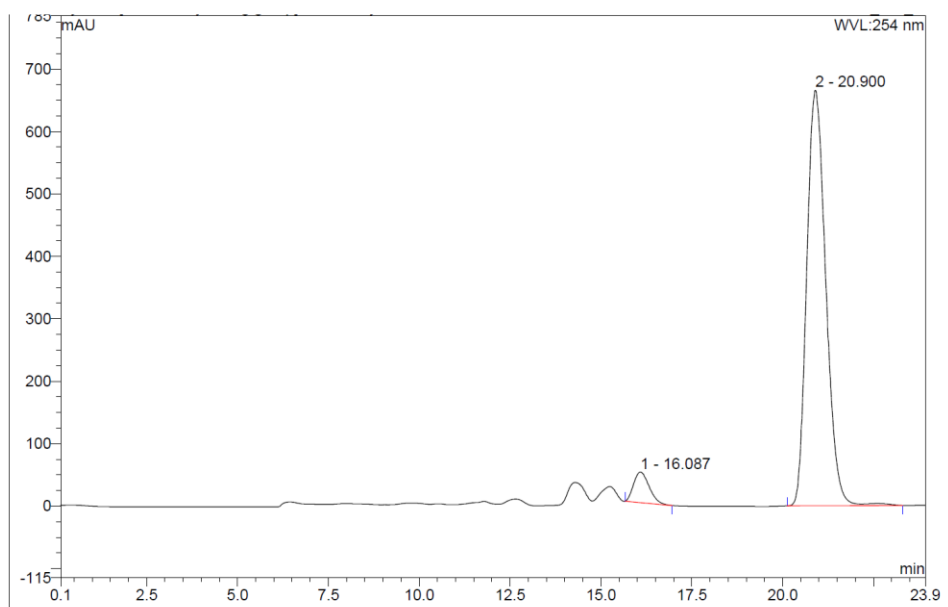

| 序号  | 保留时间<br>min | 峰名称  | 峰高<br>mAU | 峰面积<br>mAU*min | 相对峰面积<br>% | 样品量   | 类型   |
|-----|-------------|------|-----------|----------------|------------|-------|------|
| 1   | 16.09       | n.a. | 48.836    | 24.162         | 5.62       | n.a.  | BMB* |
| 2   | 20.90       | n.a. | 665.712   | 405.659        | 94.38      | n.a.  | BMB* |
| 总和: |             |      | 714.548   | 429.821        | 100.00     | 0.000 |      |

### 13) (4R,5S,6S)-tert-butyl

#### 5-formyl-2,4-diphenyl-4,5,6,7-tetrahydrobenzofuran-6-carboxylate (**4m**)

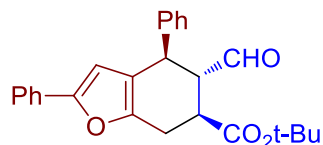

In a dried glass tube, a mixture of  $\text{PtCl}_4$  (5 mol%), pyridine *N*-oxide (10 mol%), (2S)-2-[Bis[3,5-bis(trifluoromethyl)phenyl]-[(trimethylsilyl)oxy]methyl]pyrrolidine (**3c**, 20 mol%),  $\text{TsOH} \cdot \text{H}_2\text{O}$  (20 mol%), **1a** (49.2 mg, 0.2 mmol) and **2c** (156 mg, 1.0 mmol) was mixed in  $\text{PhCH}_3$  (2 mL), stirring at 60 °C until the reaction was complete (24 h). The mixture was passed through a short silica gel column and then concentrated under reduced pressure. The residue was purified by column chromatography. **4m** (42.1 mg, 52%) was obtained as a solid.

$^1\text{H}$  NMR (400 MHz,  $\text{CDCl}_3$ )  $\delta$  9.70 (s, 1H), 7.60 – 7.48 (m, 2H), 7.37 – 7.27 (m, 5H), 7.24 – 7.16 (m, 3H), 6.13 (s, 1H), 4.07 – 3.96 (m, 1H), 3.28 – 3.14 (m, 3H), 3.05 – 2.92 (m, 1H), 1.43 (s, 9H)

$^{13}\text{C}$  NMR (100 MHz,  $\text{CDCl}_3$ )  $\delta$  203.2, 172.5, 153.2, 148.0, 141.1, 130.7, 128.9, 128.6, 128.6, 127.5, 127.2, 123.4, 121.4, 105.0, 81.8, 56.0, 42.7, 41.9, 27.9, 26.0

**MS**(EI):  $m/z$  (%): 402 ( $\text{M}^+$ , 67.74); 317 (100); **HRMS**: calcd. for  $\text{C}_{26}\text{H}_{26}\text{O}_4$  402.1831, found 402.1826

**HPLC analysis**: 90% ee (Chiralpak AD-H column, hexane/*i*-PrOH = 95/5, flow rate 0.5 mL/min, UV detection at 254 nm),  $R_t$  (major) = 15.55 min;  $R_t$  (minor) = 18.31 min

$[\alpha]_{\text{D}}^{20} = 11.0$  ( $c = 0.50$ ,  $\text{CHCl}_3$ )

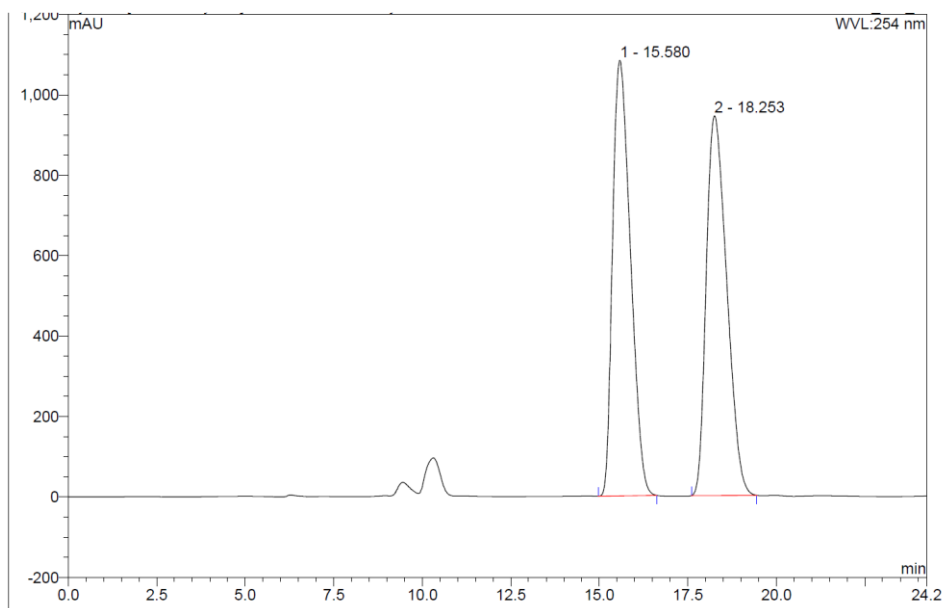

| 序号  | 保留时间<br>min | 峰名称  | 峰高<br>mAU | 峰面积<br>mAU*min | 相对峰面积<br>% | 样品量   | 类型   |
|-----|-------------|------|-----------|----------------|------------|-------|------|
| 1   | 15.58       | n.a. | 1082.653  | 632.055        | 49.96      | n.a.  | BMB* |
| 2   | 18.25       | n.a. | 944.148   | 633.113        | 50.04      | n.a.  | BMB* |
| 总和: |             |      | 2026.801  | 1265.167       | 100.00     | 0.000 |      |

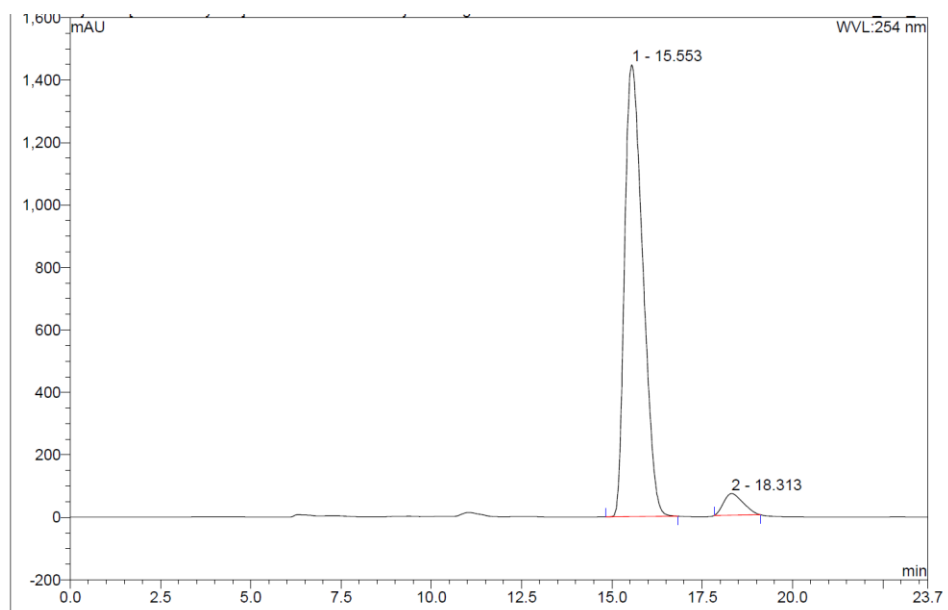

| 序号  | 保留时间<br>min | 峰名称  | 峰高<br>mAU | 峰面积<br>mAU*min | 相对峰面积<br>% | 样品量   | 类型   |
|-----|-------------|------|-----------|----------------|------------|-------|------|
| 1   | 15.55       | n.a. | 1446.754  | 841.811        | 95.13      | n.a.  | BMB* |
| 2   | 18.31       | n.a. | 68.954    | 43.129         | 4.87       | n.a.  | BMB* |
| 总和: |             |      | 1515.708  | 884.940        | 100.00     | 0.000 |      |

**14) (4R,5R,6S)-4-(4-methoxyphenyl)-2,6-diphenyl-4,5,6,7-tetrahydrobenzofuran-5-carbaldehyde (4n)**

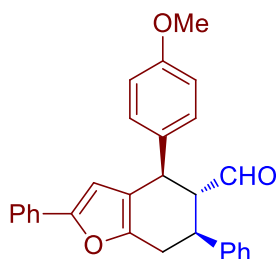

In a dried glass tube, a mixture of  $\text{PtCl}_4$  (5 mol%), pyridine *N*-oxide (10 mol%), (2S)-2-[Bis[3,5-bis(trifluoromethyl)phenyl]-[(trimethylsilyl)oxy]methyl]pyrrolidine (**3c**, 20 mol%),  $\text{TsOH} \cdot \text{H}_2\text{O}$  (20 mol%), **1h** (110.4 mg, 0.4 mmol) and **2d** (26.4 mg, 0.2 mmol) was mixed in  $\text{PhCH}_3$  (2 mL), stirring at 60 °C until the reaction was complete (24 h). The mixture was passed through a short silica gel column and then concentrated under reduced pressure. The residue was purified by column chromatography. **4n** (45.8 mg, 56%) was obtained as a solid.

$^1\text{H}$  NMR (500 MHz,  $\text{CDCl}_3$ )  $\delta$  9.37 (d,  $J$  = 3.4 Hz, 1H), 7.64 – 7.52 (m, 2H), 7.36 – 7.28 (m, 6H), 7.27 – 7.22 (m, 1H), 7.22 – 7.18 (m, 1H), 7.13 (d,  $J$  = 8.7 Hz, 2H), 6.84 (d,  $J$  = 8.7 Hz, 2H), 6.21 (s, 1H), 4.27 (d,  $J$  = 10.0 Hz, 1H), 3.79 (s, 3H), 3.45 (td,  $J$  = 11.3, 5.8 Hz, 1H), 3.21 (ddd,  $J$  = 11.6, 10.1, 3.4 Hz, 1H), 3.17 – 2.94 (m, 2H).

$^{13}\text{C}$  NMR (125MHz,  $\text{CDCl}_3$ )  $\delta$  203.7, 158.6, 152.8, 149.1, 141.2, 133.6, 130.9, 129.6, 129.0, 128.6, 127.7, 127.4, 127.1, 123.4, 121.7, 114.0, 105.4, 60.8, 55.2, 43.8, 41.0, 32.2

**HRMS** (ESI,  $m/z$ ):  $[\text{M}+\text{H}]^+$  calcd. for  $\text{C}_{28}\text{H}_{25}\text{O}_3$  409.1798, found 409.1796

**HPLC analysis:** 99% ee (Chiralpak OD-H column, hexane/*i*-PrOH = 95/5, flow rate 0.8 mL/min, UV detection at 254 nm),  $R_t$  (major) = 20.64 min;  $R_t$  (minor) = 28.99 min

$[\alpha]_{\text{D}}^{20}$  = -20.6 ( $c$  = 1.0,  $\text{CHCl}_3$ )

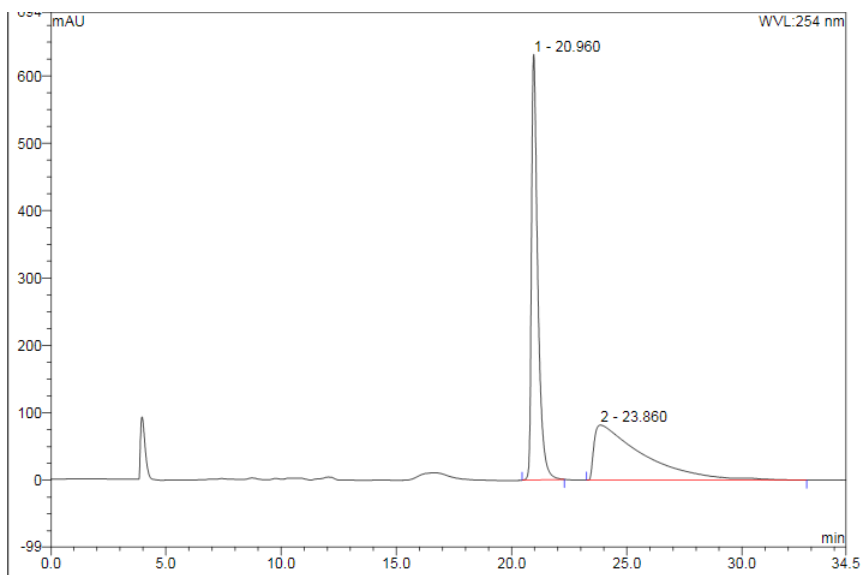

| No.           | Ret.Time<br>min | Peak Name | Height<br>mAU | Area<br>mAU*min | Rel.Area<br>% | Amount | Type |
|---------------|-----------------|-----------|---------------|-----------------|---------------|--------|------|
| 1             | 20.96           | n.a.      | 631.829       | 201.804         | 50.41         | n.a.   | BMB* |
| 2             | 23.86           | n.a.      | 81.633        | 198.556         | 49.59         | n.a.   | BMB* |
| <b>Total:</b> |                 |           | 713.462       | 400.360         | 100.00        | 0.000  |      |

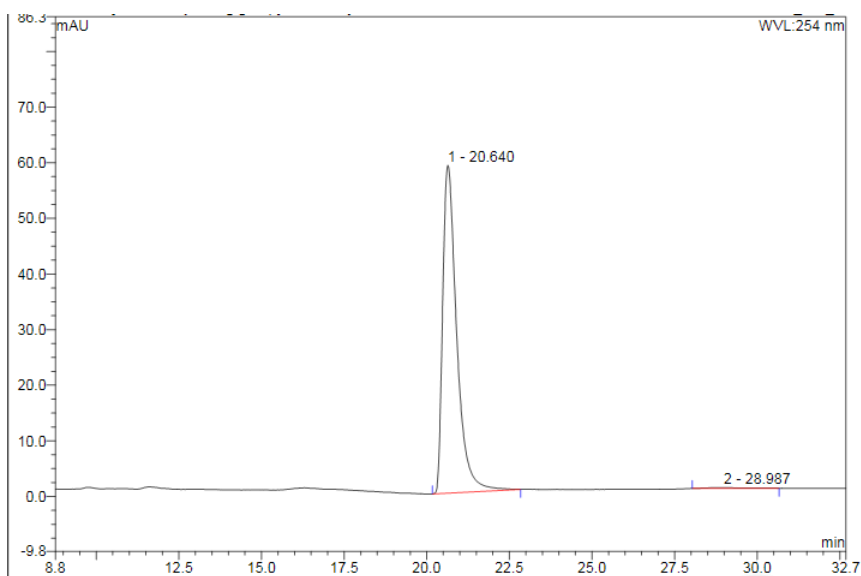

| No.           | Ret.Time<br>min | Peak Name | Height<br>mAU | Area<br>mAU*min | Rel.Area<br>% | Amount | Type |
|---------------|-----------------|-----------|---------------|-----------------|---------------|--------|------|
| 1             | 20.64           | n.a.      | 58.962        | 29.034          | 99.44         | n.a.   | BMB* |
| 2             | 28.99           | n.a.      | 0.123         | 0.163           | 0.56          | n.a.   | BMB* |
| <b>Total:</b> |                 |           | 59.085        | 29.197          | 100.00        | 0.000  |      |

79% 0.1% 0%

### 15) ethyl

#### 4-((4R,5R,6S)-5-formyl-2,4-diphenyl-4,5,6,7-tetrahydrobenzofuran-6-yl)benzoate (4o)

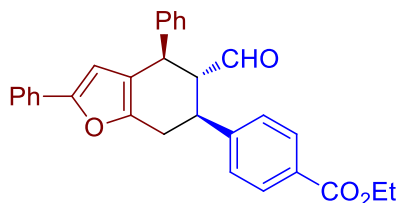

In a dried glass tube, a mixture of  $\text{PtCl}_4$  (5 mol%), pyridine *N*-oxide (10 mol%), (2S)-2-[Bis[3,5-bis(trifluoromethyl)phenyl]-[(trimethylsilyl)oxy]methyl]pyrrolidine (**3c**, 20 mol%),  $\text{TsOH} \cdot \text{H}_2\text{O}$  (20 mol%), **1a** (98.4 mg, 0.4 mmol) and **2e** (40.8 mg, 0.2 mmol) was mixed in  $\text{PhCH}_3$  (2 mL), stirring at 60 °C until the reaction was complete (24 h). The mixture was passed through a short silica gel column and then concentrated under reduced pressure. The residue was purified by column chromatography. **4o** (48.7 mg, 54%) was obtained as a solid.

$^1\text{H}$  NMR (500 MHz,  $\text{CDCl}_3$ )  $\delta$  9.38 (d,  $J$  = 3.1 Hz, 1H), 8.01 (d,  $J$  = 8.3 Hz, 2H), 7.57 (d,  $J$  = 7.2 Hz, 2H), 7.39-7.34(m, 3H), 7.33 –7.26 (m, 4H), 7.24 –7.17 (m, 3H), 6.20 (s, 1H), 4.37 (q,  $J$  = 7.2 Hz, 2H), 4.30 (d,  $J$  = 10.0 Hz, 1H), 3.54 (td,  $J$  = 11.0, 6.1 Hz, 1H), 3.29 (ddd,  $J$  = 11.6, 10.1, 3.1 Hz, 1H), 3.19 –3.00 (m, 2H), 1.38 (t,  $J$  = 7.1 Hz, 3H)

$^{13}\text{C}$  NMR (125MHz,  $\text{CDCl}_3$ )  $\delta$  203.1, 166.2, 153.0, 148.7, 146.4, 141.4, 130.8, 130.3, 129.7, 128.8, 128.6, 128.6, 127.7, 127.3, 127.2, 123.4, 121.4, 105.2, 61.0, 60.3, 43.6, 42.1, 31.9, 14.3.

**MS**(EI):  $m/z$  (%): 450 ( $\text{M}^+$ , 45.19); 246 (100); **HRMS**: calcd.for  $\text{C}_{30}\text{H}_{26}\text{O}_4$  450.1833, found 450.1831

**HPLC analysis**: 90% ee (Chiralpak OD-H column, hexane/*i*-PrOH = 80/20, flow rate 0.5 mL/min, UV detection at 254 nm),  $R_t$  (minor) = 24.03 min;  $R_t$  (major) = 33.40 min

$[\alpha]_{\text{D}}^{20}$  = -24.3 ( $c$  = 0.60,  $\text{CHCl}_3$ )

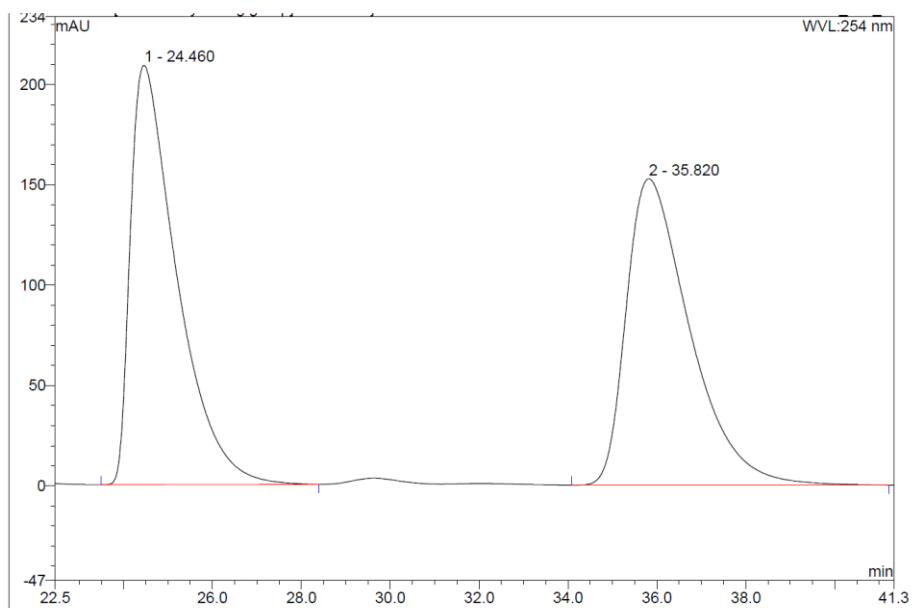

| No.    | Ret.Time<br>min | Peak Name | Height<br>mAU | Area<br>mAU*min | Rel.Area<br>% | Amount | Type |
|--------|-----------------|-----------|---------------|-----------------|---------------|--------|------|
| 1      | 24.46           | n.a.      | 208.992       | 252.592         | 49.98         | n.a.   | BMB* |
| 2      | 35.82           | n.a.      | 152.677       | 252.800         | 50.02         | n.a.   | BMB* |
| Total: |                 |           | 361.669       | 505.392         | 100.00        | 0.000  |      |

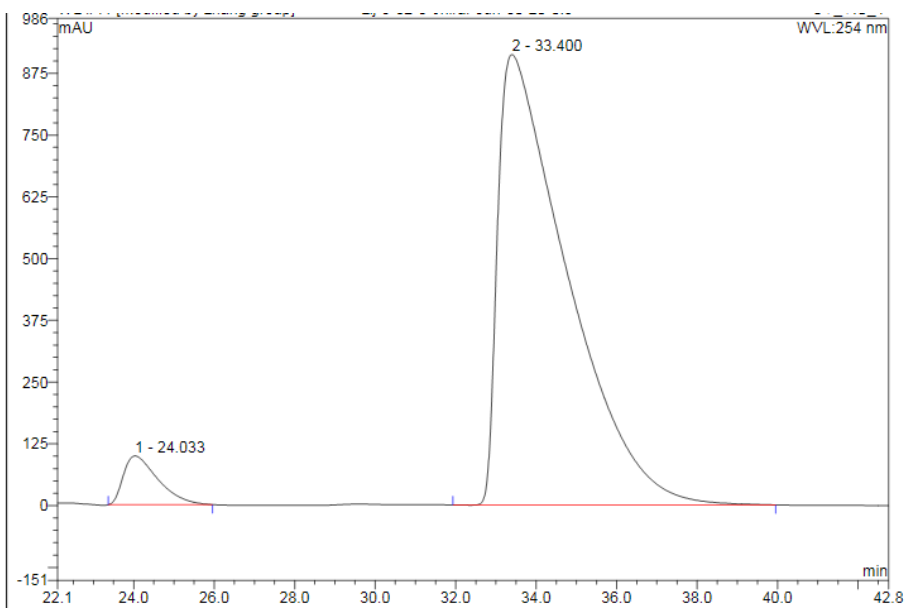

| No.    | Ret.Time<br>min | Peak Name | Height<br>mAU | Area<br>mAU*min | Rel.Area<br>% | Amount | Type |
|--------|-----------------|-----------|---------------|-----------------|---------------|--------|------|
| 1      | 24.03           | n.a.      | 98.651        | 98.351          | 5.13          | n.a.   | BMB* |
| 2      | 33.40           | n.a.      | 911.489       | 1818.195        | 94.87         | n.a.   | BMB* |
| Total: |                 |           | 1010.141      | 1916.546        | 100.00        | 0.000  |      |

**16) (4R,5R,6S)-2,4-diphenyl-6-(4-(trifluoromethyl)phenyl)-4,5,6,7-tetrahydrobenzofuran-5-carbaldehyde (4p)**

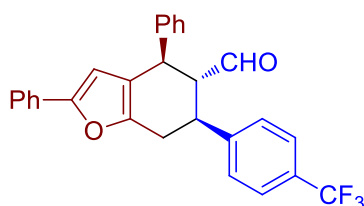

In a dried glass tube, a mixture of  $\text{PtCl}_4$  (5 mol%), pyridine *N*-oxide (10 mol%), (2S)-2-[Bis[3,5-bis(trifluoromethyl)phenyl]-[(trimethylsilyl)oxy]methyl]pyrrolidine (**3c**, 20 mol%),  $\text{TsOH} \cdot \text{H}_2\text{O}$  (20 mol%), **1a** (98.4 mg, 0.4 mmol) and **2f** (40.0 mg, 0.2 mmol) was mixed in  $\text{PhCH}_3$  (2 mL), stirring at 60 °C until the reaction was complete (24 h). The mixture was passed through a short silica gel column and then concentrated under reduced pressure. The residue was purified by column chromatography. **4p** (44.8 mg, 50%) was obtained as a solid.

$^1\text{H}$  NMR (400 MHz,  $\text{CDCl}_3$ )  $\delta$  9.40 (d,  $J = 3.2$  Hz, 1H), 7.61 – 7.54 (m, 4H), 7.42 (d,  $J = 8.1$  Hz, 2H), 7.36 – 7.25 (m, 5H), 7.24 – 7.20 (m, 3H), 6.21 (s, 1H), 4.30 (d,  $J = 10.1$  Hz, 1H), 3.56 (td,  $J = 11.3, 5.7$  Hz, 1H), 3.30 (ddd,  $J = 11.5, 10.1, 3.1$  Hz, 1H), 3.18 – 3.11 (m, 1H), 3.06 (ddd,  $J = 16.7, 11.2, 2.9$  Hz, 1H)

$^{13}\text{C}$  NMR (101 MHz,  $\text{CDCl}_3$ )  $\delta$  203.1, 153.1, 148.6, 145.5, 141.2, 130.7, 129.7 (q,  $J = 32.6$  Hz), 128.8, 128.7, 128.5, 128.1, 127.4, 127.2, 126.0 (q,  $J = 3.7$  Hz), 124.0 (q,  $J = 270.0$  Hz), 123.5, 121.4, 105.2, 60.2, 43.2, 42.2, 31.9

**MS**(EI):  $m/z$  (%): 446 ( $\text{M}^+$ , 77.54); 246 (100); **HRMS**: calcd. for  $\text{C}_{28}\text{H}_{21}\text{F}_3\text{O}_2$  446.1494, found 446.1497

**HPLC analysis**: 97% ee (Chiralpak OD-H column, hexane/*i*-PrOH = 80/20, flow rate 0.5 mL/min, UV detection at 254 nm),  $R_t$  (major) = 13.87 min;  $R_t$  (minor) = 20.70 min

$[\alpha]_{\text{D}}^{20} = -18.7$  ( $c = 0.6$ ,  $\text{CHCl}_3$ )

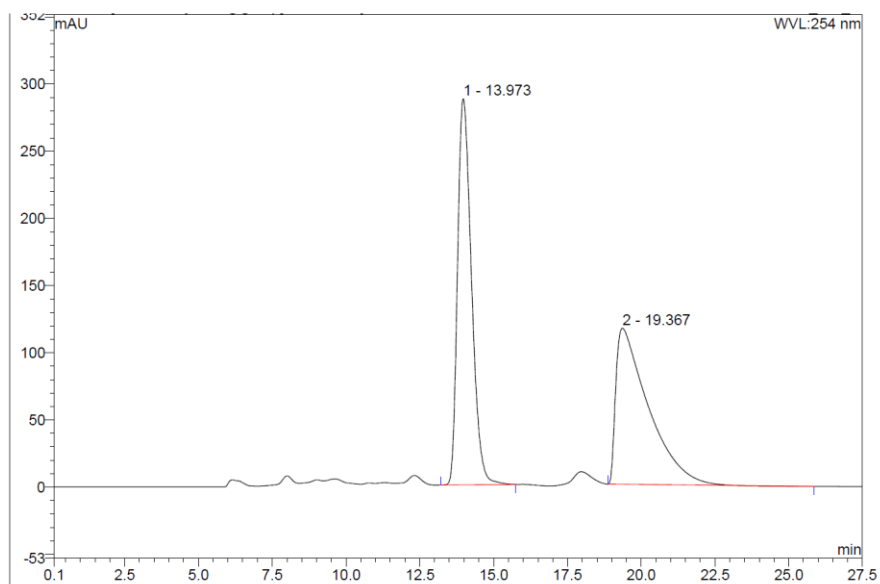

| No.    | Ret.Time<br>min | Peak Name | Height<br>mAU | Area<br>mAU*min | Rel.Area<br>% | Amount | Type |
|--------|-----------------|-----------|---------------|-----------------|---------------|--------|------|
| 1      | 13.97           | n.a.      | 287.439       | 157.212         | 51.47         | n.a.   | BMB* |
| 2      | 19.37           | n.a.      | 116.160       | 148.224         | 48.53         | n.a.   | BMB* |
| Total: |                 |           | 403.599       | 305.436         | 100.00        | 0.000  |      |

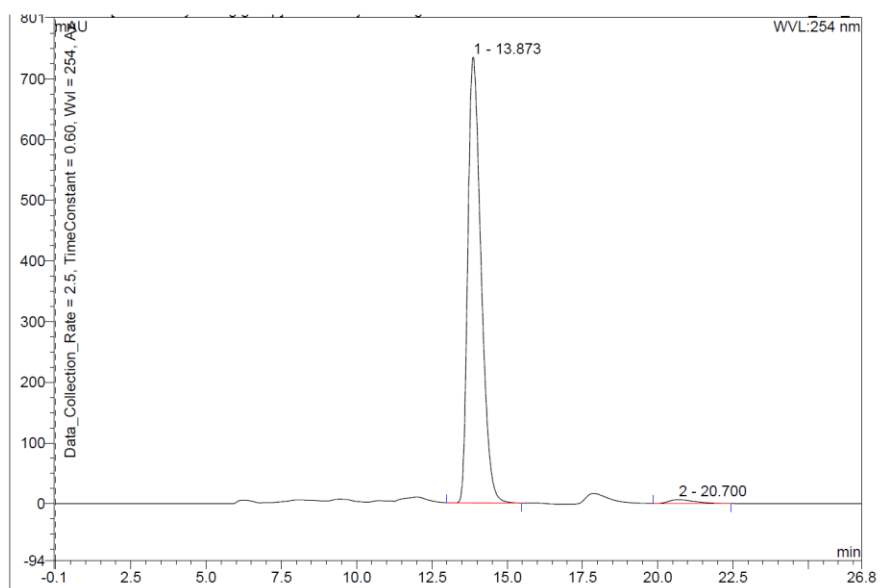

| No.    | Ret.Time<br>min | Peak Name | Height<br>mAU | Area<br>mAU*min | Rel.Area<br>% | Amount | Type |
|--------|-----------------|-----------|---------------|-----------------|---------------|--------|------|
| 1      | 13.87           | n.a.      | 734.694       | 374.152         | 98.35         | n.a.   | BMB* |
| 2      | 20.70           | n.a.      | 6.333         | 6.288           | 1.65          | n.a.   | BMB* |
| Total: |                 |           | 741.026       | 380.439         | 100.00        | 0.000  |      |

**17) (4R,5R,6S)-6-(4-nitrophenyl)-2,4-diphenyl-4,5,6,7-tetrahydrobenzofuran-5-carbaldehyde (4q)**

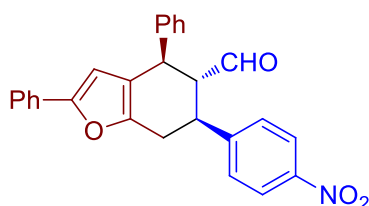

In a dried glass tube, a mixture of  $\text{PtCl}_4$  (5 mol%), pyridine *N*-oxide (10 mol%), (2S)-2-[Bis[3,5-bis(trifluoromethyl)phenyl]-[(trimethylsilyl)oxy]methyl]pyrrolidine (**3c**, 20 mol%),  $\text{TsOH} \cdot \text{H}_2\text{O}$  (20 mol%), **1a** (98.4 mg, 0.4 mmol) and **2g** (35.4 mg, 0.2 mmol) was mixed in  $\text{PhCH}_3$  (2 mL), stirring at 60 °C until the reaction was complete (24 h). The mixture was passed through a short silica gel column and then concentrated under reduced pressure. The residue was purified by column chromatography. **4q** (47.6 mg, 56%) was obtained as a solid.

$^1\text{H}$  NMR (500 MHz,  $\text{CDCl}_3$ )  $\delta$  9.42 (d,  $J$  = 3.0 Hz, 1H), 8.19 (d,  $J$  = 8.5 Hz, 2H), 7.57 (d,  $J$  = 7.5 Hz, 2H), 7.46 (d,  $J$  = 8.5 Hz, 2H), 7.36 – 7.29 (m, 4H), 7.28 – 7.19 (m, 4H), 6.21 (s, 1H), 4.28 (d,  $J$  = 10.0 Hz, 1H), 3.63 (td,  $J$  = 11.5, 5.5 Hz, 1H), 3.37 – 3.26 (m, 1H), 3.16 (dd,  $J$  = 16.5, 5.0 Hz, 1H), 3.05 (ddd,  $J$  = 16.5, 11.0, 3.0 Hz, 1H)

$^{13}\text{C}$  NMR (125 MHz,  $\text{CDCl}_3$ )  $\delta$  202.8, 153.2, 149.1, 148.2, 147.2, 140.9, 130.6, 128.9, 128.7, 128.6, 128.5, 127.5, 127.3, 124.3, 123.5, 121.4, 105.1, 60.1, 43.0, 42.4, 31.6

**HRMS** (ESI,  $m/z$ ):  $[\text{M}+\text{H}]^+$  calcd. for  $\text{C}_{27}\text{H}_{22}\text{NO}_4$  424.1543, found 424.1544.

**HPLC analysis:** 94% ee (Chiralpak OD-H column, hexane/*i*-PrOH = 80/20, flow rate 0.8 mL/min, UV detection at 254 nm),  $R_t$  (minor) = 42.39 min;  $R_t$  (major) = 49.01 min

$[\alpha]_{\text{D}}^{20}$  = -50.3 ( $c$  = 1.0,  $\text{CHCl}_3$ )

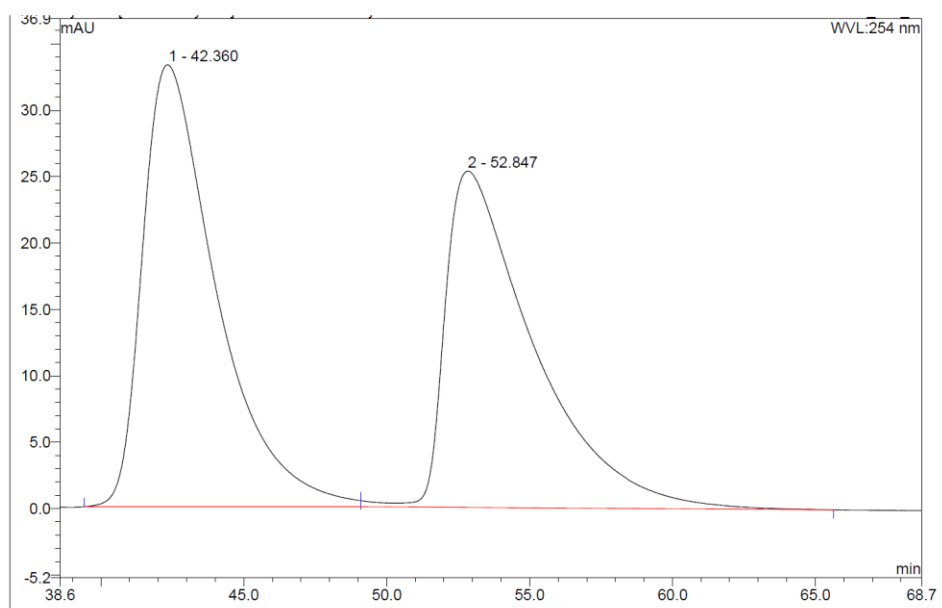

| 序号  | 保留时间<br>min | 峰名称  | 峰高<br>mAU | 峰面积<br>mAU*min | 相对峰面积<br>% | 样品量   | 类型   |
|-----|-------------|------|-----------|----------------|------------|-------|------|
| 1   | 42.36       | n.a. | 33.280    | 99.889         | 52.31      | n.a.  | BM * |
| 2   | 52.85       | n.a. | 25.338    | 91.063         | 47.69      | n.a.  | MB*  |
| 总和: |             |      | 58.618    | 190.952        | 100.00     | 0.000 |      |

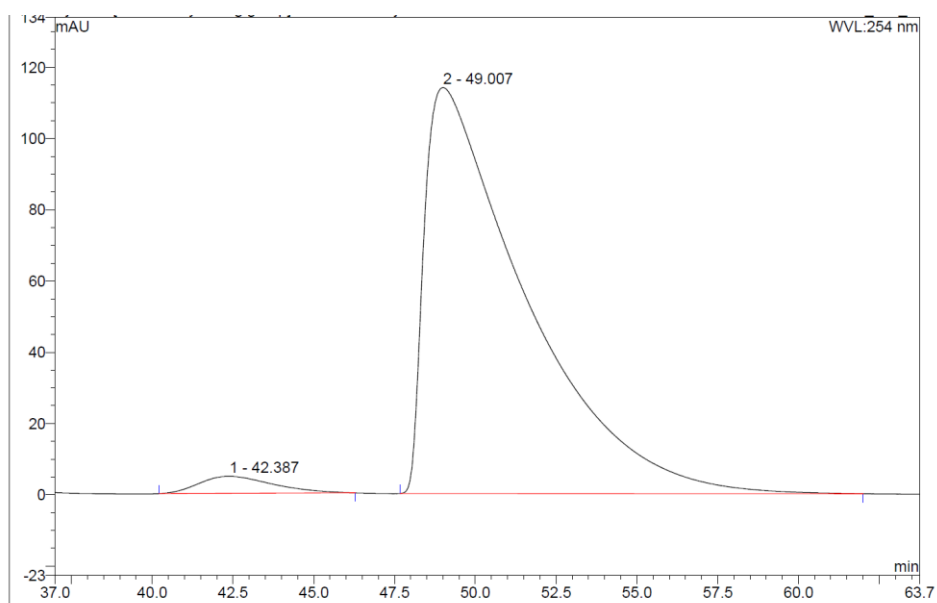

| 序号  | 保留时间<br>min | 峰名称  | 峰高<br>mAU | 峰面积<br>mAU*min | 相对峰面积<br>% | 样品量   | 类型   |
|-----|-------------|------|-----------|----------------|------------|-------|------|
| 1   | 42.39       | n.a. | 4.794     | 12.613         | 2.96       | n.a.  | BMB* |
| 2   | 49.01       | n.a. | 113.979   | 413.241        | 97.04      | n.a.  | BMB* |
| 总和: |             |      | 118.772   | 425.854        | 100.00     | 0.000 |      |

**18) (4R,5R,6S)-6-(4-nitrophenyl)-4-phenyl-2-(p-tolyl)-4,5,6,7-tetrahydrobenzofuran-5-carbaldehyde (4r)**

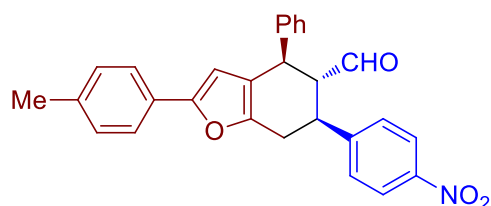

In a dried glass tube, a mixture of  $\text{PtCl}_4$  (5 mol%), pyridine *N*-oxide (10 mol%), (2S)-2-[Bis[3,5-bis(trifluoromethyl)phenyl]-[(trimethylsilyl)oxy]methyl]pyrrolidine (**3c**, 20 mol%),  $\text{TsOH} \cdot \text{H}_2\text{O}$  (20 mol%), **1b** (104.0 mg, 0.4 mmol) and **2g** (35.4 mg, 0.2 mmol) was mixed in  $\text{PhCH}_3$  (2 mL), stirring at 60 °C until the reaction was complete (24 h). The mixture was passed through a short silica gel column and then concentrated under reduced pressure. The residue was purified by column chromatography. **4r** (50.8 mg, 58%) was obtained as a solid.

$^1\text{H}$  NMR (500 MHz,  $\text{CDCl}_3$ )  $\delta$  9.41 (d,  $J = 3.0$  Hz, 1H), 8.18 (d,  $J = 8.8$  Hz, 2H), 7.46 (dd,  $J = 8.4, 1.5$  Hz, 4H), 7.32 (t,  $J = 7.2$  Hz, 2H), 7.29 – 7.26 (m, 1H), 7.24 – 7.20 (m, 2H), 7.14 (d,  $J = 8.1$  Hz, 2H), 6.15 (s, 1H), 4.27 (d,  $J = 9.9$  Hz, 1H), 3.62 (td,  $J = 11.3, 5.6$  Hz, 1H), 3.31 (ddd,  $J = 11.4, 10.0, 3.0$  Hz, 1H), 3.18 – 3.11 (m, 1H), 3.04 (ddd,  $J = 16.7, 11.1, 2.9$  Hz, 1H), 2.33 (s, 3H)

$^{13}\text{C}$  NMR (126 MHz,  $\text{CDCl}_3$ )  $\delta$  202.9, 153.4, 149.2, 147.7, 147.1, 141.0, 137.2, 129.4, 128.9, 128.6, 128.5, 128.0, 127.5, 124.2, 123.4, 121.3, 104.4, 60.1, 43.0, 42.4, 31.6, 21.2

**MS**(EI):  $m/z$  (%): 437 ( $\text{M}^+$ , 48.98); 260 (100), **HRMS**: calcd. for  $\text{C}_{28}\text{H}_{23}\text{NO}_4$  437.1627, found 437.1629.

**HPLC analysis**: 97% ee (Chiralpak OD-3 column, hexane/*i*-PrOH = 80/20, flow rate 0.8 mL/min, UV detection at 254 nm),  $R_t$  (minor) = 29.82 min;  $R_t$  (major) = 36.02 min

$[\alpha]_{\text{D}}^{20} = -19.0$  ( $c = 1.0$ ,  $\text{CHCl}_3$ )

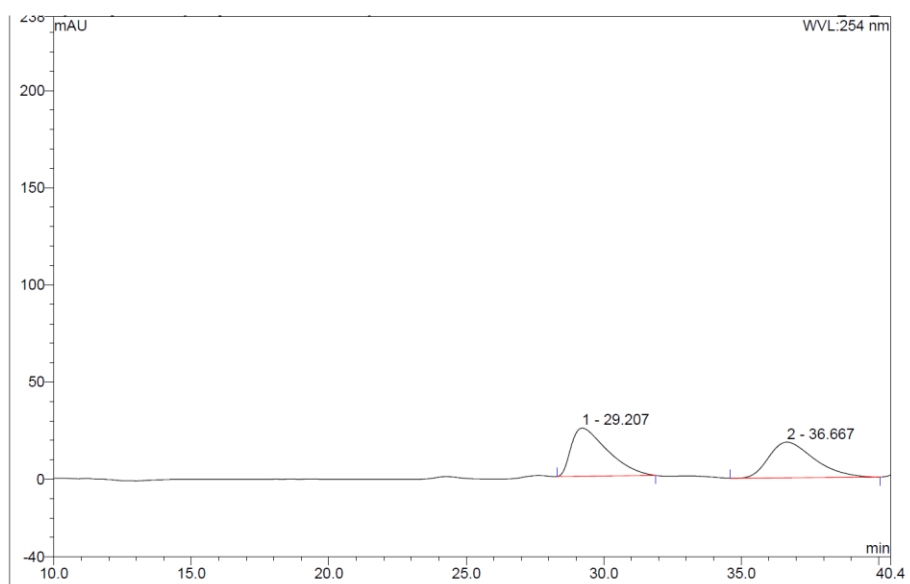

| 序号  | 保留时间<br>min | 峰名称  | 峰高<br>mAU | 峰面积<br>mAU*min | 相对峰面积<br>% | 样品量   | 类型   |
|-----|-------------|------|-----------|----------------|------------|-------|------|
| 1   | 29.21       | n.a. | 24.735    | 37.767         | 51.80      | n.a.  | BMB* |
| 2   | 36.67       | n.a. | 18.345    | 35.145         | 48.20      | n.a.  | BMB* |
| 总和: |             |      | 43.079    | 72.912         | 100.00     | 0.000 |      |

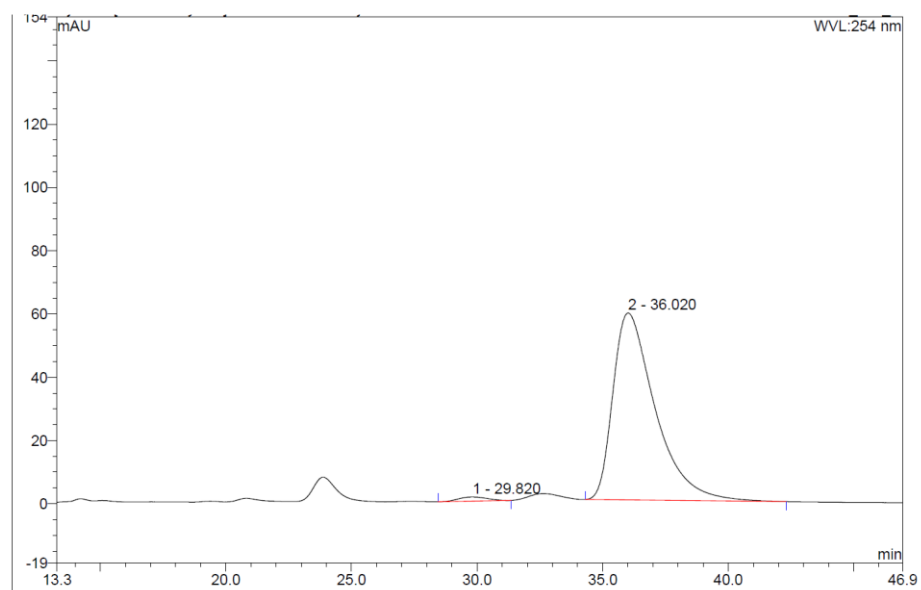

| 序号  | 保留时间<br>min | 峰名称  | 峰高<br>mAU | 峰面积<br>mAU*min | 相对峰面积<br>% | 样品量   | 类型   |
|-----|-------------|------|-----------|----------------|------------|-------|------|
| 1   | 29.82       | n.a. | 1.339     | 1.760          | 1.50       | n.a.  | BMB* |
| 2   | 36.02       | n.a. | 59.096    | 115.171        | 98.50      | n.a.  | BMB* |
| 总和: |             |      | 60.436    | 116.931        | 100.00     | 0.000 |      |

**19) (4R,5R,6S)-4-(4-methoxyphenyl)-6-(4-nitrophenyl)-2-phenyl-4,5,6,7-tetrahydrobenzofuran-5-carbaldehyde (4s)**

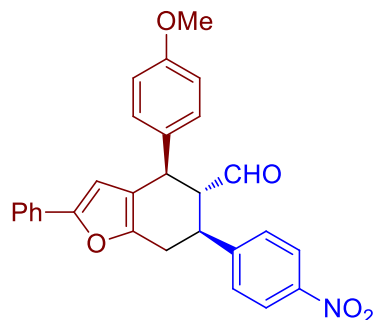

In a dried glass tube, a mixture of  $\text{PtCl}_4$  (5 mol%), pyridine *N*-oxide (10 mol%), (2S)-2-[Bis[3,5-bis(trifluoromethyl)phenyl]-[(trimethylsilyl)oxy]methyl]pyrrolidine (**3c**, 20 mol%),  $\text{TsOH} \cdot \text{H}_2\text{O}$  (20 mol%), **1h** (110.4 mg, 0.4 mmol) and **2g** (35.4 mg, 0.2 mmol) was mixed in  $\text{PhCH}_3$  (2 mL), stirring at 60 °C until the reaction was complete (24 h). The mixture was passed through a short silica gel column and then concentrated under reduced pressure. The residue was purified by column chromatography. **4s** (54.5 mg, 60%) was obtained as a solid.

$^1\text{H}$  NMR (500 MHz,  $\text{CDCl}_3$ )  $\delta$  9.42 (d,  $J = 3.1$  Hz, 1H), 8.19 (d,  $J = 8.7$  Hz, 2H), 7.68 – 7.54 (m, 2H), 7.46 (d,  $J = 8.7$  Hz, 2H), 7.33 (t,  $J = 7.8$  Hz, 2H), 7.22 (t,  $J = 7.4$  Hz, 1H), 7.14 (d,  $J = 8.7$  Hz, 2H), 6.85 (d,  $J = 8.7$  Hz, 2H), 6.22 (s, 1H), 4.23 (d,  $J = 9.9$  Hz, 1H), 3.79 (s, 3H), 3.62 (td,  $J = 11.4, 5.7$  Hz, 1H), 3.27 (ddd,  $J = 11.5, 10.1, 3.1$  Hz, 1H), 3.15 (dd,  $J = 16.4, 5.3$  Hz, 1H), 3.03 (ddd,  $J = 16.7, 11.3, 2.9$  Hz, 1H).

$^{13}\text{C}$  NMR (126 MHz,  $\text{CDCl}_3$ )  $\delta$  203.0, 158.9, 153.1, 149.2, 148.1, 147.2, 132.8, 130.7, 129.4, 128.7, 128.6, 127.3, 124.3, 123.4, 121.8, 114.2, 105.1, 60.3, 55.3, 43.0, 41.6, 31.7

**HRMS** (ESI,  $m/z$ ):  $[\text{M}+\text{H}]^+$  calcd. for  $\text{C}_{28}\text{H}_{24}\text{NO}_5$  454.1649, found 454.1653.

**HPLC analysis:** 97% ee (Chiralpak OD-H column, hexane/*i*-PrOH = 60/40, flow rate 1.0 mL/min, UV detection at 254 nm),  $R_t$  (minor) = 22.76 min;  $R_t$  (major) = 26.13 min

$[\alpha]_{\text{D}}^{20} = -27.6$  ( $c = 0.60$ ,  $\text{CHCl}_3$ )

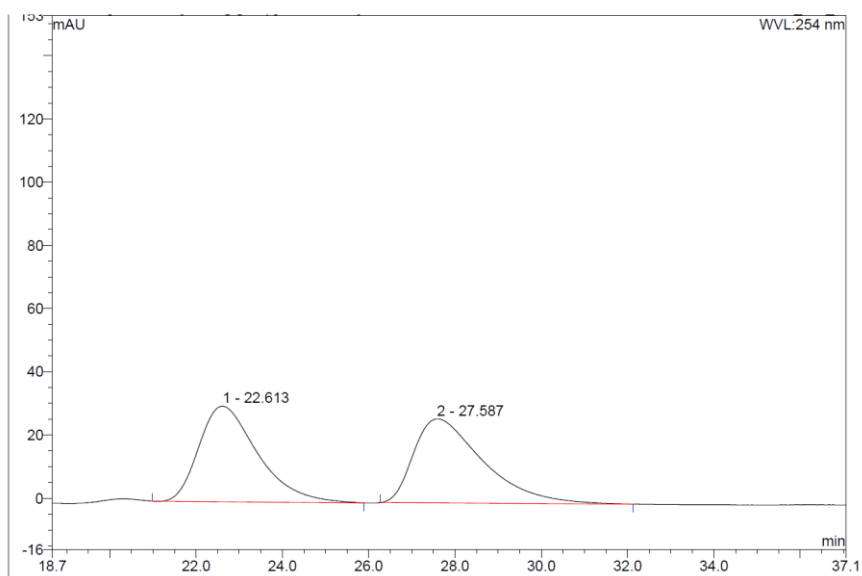

| No.    | Ret.Time<br>min | Peak Name | Height<br>mAU | Area<br>mAU*min | Rel.Area<br>% | Amount | Type |
|--------|-----------------|-----------|---------------|-----------------|---------------|--------|------|
| 1      | 22.61           | n.a.      | 30.252        | 47.655          | 49.15         | n.a.   | BMB* |
| 2      | 27.59           | n.a.      | 26.598        | 49.296          | 50.85         | n.a.   | BMB* |
| Total: |                 |           | 56.850        | 96.950          | 100.00        | 0.000  |      |

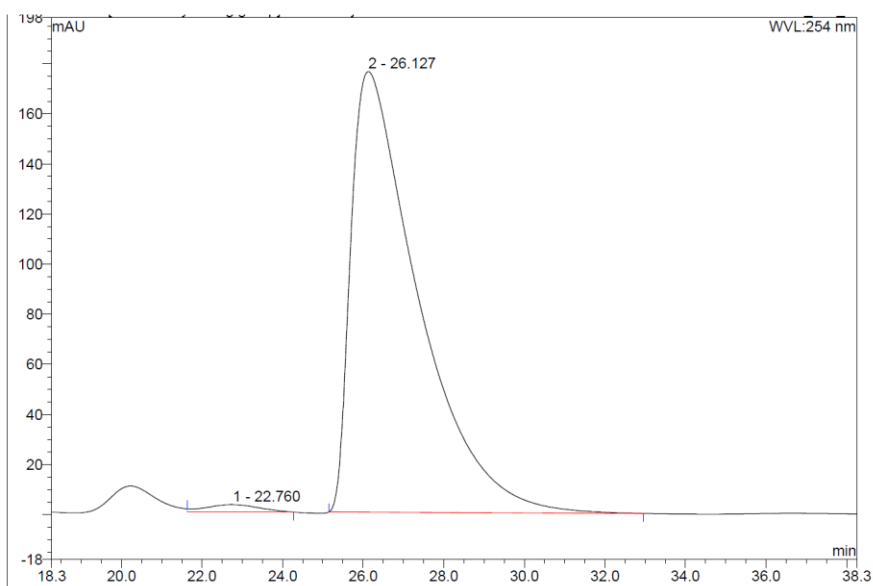

| No.    | Ret.Time<br>min | Peak Name | Height<br>mAU | Area<br>mAU*min | Rel.Area<br>% | Amount | Type |
|--------|-----------------|-----------|---------------|-----------------|---------------|--------|------|
| 1      | 22.76           | n.a.      | 2.989         | 4.571           | 1.33          | n.a.   | MB*  |
| 2      | 26.13           | n.a.      | 175.914       | 340.106         | 98.67         | n.a.   | BMB* |
| Total: |                 |           | 178.903       | 344.677         | 100.00        | 0.000  |      |

**20) (4R,5R,6S)-6-(3-chlorophenyl)-2,4-diphenyl-4,5,6,7-tetrahydrobenzofuran-5-carbaldehyde (4t)**

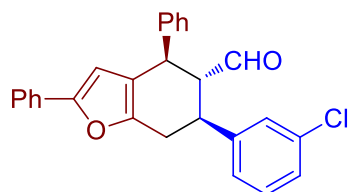

In a dried glass tube, a mixture of  $\text{PtCl}_4$  (5 mol%), pyridine *N*-oxide (10 mol%), (2S)-2-[Bis[3,5-bis(trifluoromethyl)phenyl]-[(trimethylsilyl)oxy]methyl]pyrrolidine (**3c**, 20 mol%),  $\text{TsOH} \cdot \text{H}_2\text{O}$  (20 mol%), **1a** (98.4 mg, 0.4 mmol) and **2h** (33.2 mg, 0.2 mmol) was mixed in  $\text{PhCH}_3$  (2 mL), stirring at 60 °C until the reaction was complete (24 h). The mixture was passed through a short silica gel column and then concentrated under reduced pressure. The residue was purified by column chromatography. **4r** (40.4 mg, 49%) was obtained as a solid.

$^1\text{H}$  NMR (400 MHz,  $\text{CDCl}_3$ )  $\delta$  9.41 (d,  $J$  = 3.2 Hz, 1H), 7.61 – 7.52 (m, 2H), 7.38 – 7.28 (m, 6H), 7.26 – 7.15 (m, 6H), 6.21 (s, 1H), 4.30 (d,  $J$  = 9.8 Hz, 1H), 3.46 (td,  $J$  = 11.3, 5.7 Hz, 1H), 3.25 (ddd,  $J$  = 11.6, 10.1, 3.2 Hz, 1H), 3.18 – 3.10 (m, 1H), 3.05 (ddd,  $J$  = 16.7, 11.1, 2.8 Hz, 1H).

$^{13}\text{C}$  NMR (151 MHz,  $\text{CDCl}_3$ )  $\delta$  203.18, 152.98, 148.69, 143.36, 141.39, 134.85, 130.77, 130.33, 128.74, 128.63, 128.56, 127.78, 127.68, 127.31, 127.17, 125.93, 123.43, 121.37, 105.24, 60.31, 43.28, 42.01, 31.97.

**HRMS** (ESI,  $m/z$ ):  $[\text{M}+\text{H}]^+$  calcd. for  $\text{C}_{27}\text{H}_{22}\text{ClO}_2$  413.1303, found 413.1300.

**HPLC analysis:** 98% ee (Chiralpak AD-H column, hexane/*i*-PrOH = 95/5, flow rate 0.75 mL/min, UV detection at 254 nm),  $R_t$  (major) = 15.94 min,  $R_t$  (minor) = 25.32 min.

$[\alpha]_{\text{D}}^{20}$  = -23.2 ( $c$  = 1.0,  $\text{CHCl}_3$ )

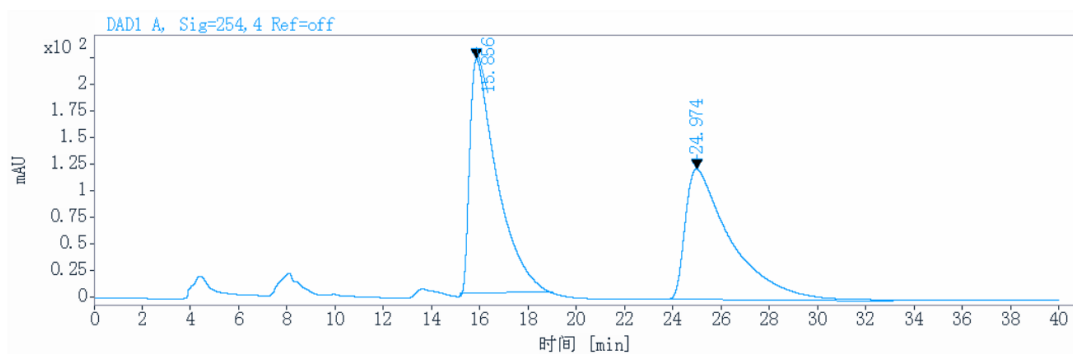

信号: DAD1 A, Sig=254,4 Ref=off

| RT     | Area       | Height   | Area%   | Height% |
|--------|------------|----------|---------|---------|
| 15.856 | 17220.5586 | 220.1901 | 51.6415 | 64.31   |
| 24.974 | 16125.7891 | 122.2174 | 48.3585 | 35.69   |
| ? ?    | 33346.3477 |          |         |         |

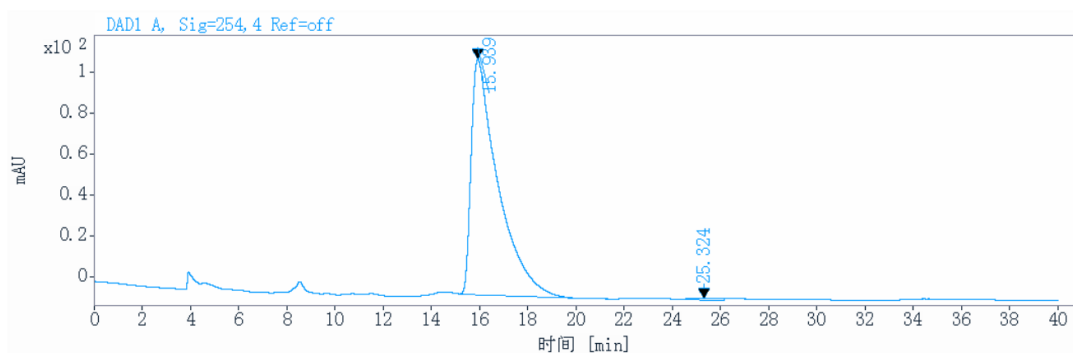

信号: DAD1 A, Sig=254,4 Ref=off

| RT     | Area      | Height   | Area%   | Height% |
|--------|-----------|----------|---------|---------|
| 15.939 | 8865.0576 | 114.9247 | 99.1018 | 99.23   |
| 25.324 | 80.3469   | 0.8954   | 0.8982  | 0.77    |
| ? ?    | 8945.4045 |          |         |         |

### 3. Transformations of 4a

#### 1) (4R,5S,6S)-ethyl

#### 5-(hydroxymethyl)-2,4-diphenyl-4,5,6,7-tetrahydrobenzofuran-6-carboxylate

(5)

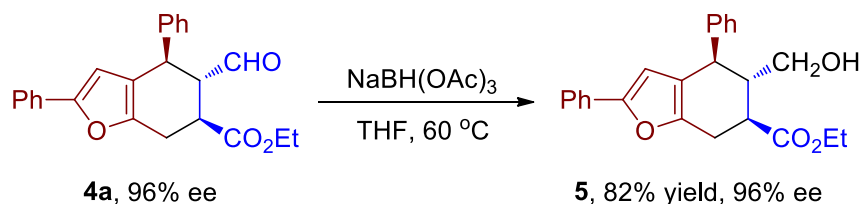

Under N<sub>2</sub>, a stirred solution of **4a** (0.2 mmol) in THF (2 mL) was added NaBH(OAc)<sub>3</sub> (0.6 mmol). The mixture was stirred at 60 °C for 3 h. After completion of the reaction, the reaction mixture was directly applied to a silica gel chromatography column to afford the desired **5** in 82% (61.7 mg) yield without loss of enantiopurity.

<sup>1</sup>H NMR (500 MHz, CDCl<sub>3</sub>) δ 7.54 (dd, J = 8.4, 1.1 Hz, 2H), 7.34 – 7.28 (m, 4H), 7.27 – 7.25 (m, 1H), 7.24 – 7.22 (m, 2H), 7.20 – 7.17 (m, 1H), 6.12 (s, 1H), 4.18 (qq, J = 10.8, 7.1 Hz, 2H), 4.01 – 3.92 (m, 1H), 3.59 (d, J = 11.9 Hz, 1H), 3.55 – 3.45 (m, 1H), 3.21 (ddd, J = 15.5, 10.0, 2.8 Hz, 1H), 3.13 – 3.00 (m, 2H), 2.13 (tt, J = 10.2, 3.2 Hz, 1H), 1.81 (s, 1H), 1.28 (t, J = 7.1 Hz, 3H).

<sup>13</sup>C NMR (126 MHz, CDCl<sub>3</sub>) δ 174.6, 152.8, 147.9, 142.8, 130.9, 128.9, 128.6, 128.5, 126.9, 126.9, 123.3, 122.3, 105.8, 61.3, 61.1, 47.3, 42.8, 41.3, 26.1, 14.2

**HRMS** (ESI, m/z): [M+H]<sup>+</sup> calcd. for C<sub>24</sub>H<sub>25</sub>O<sub>4</sub> 377.1747, found 377.1749

**HPLC analysis:** 96% ee (Chiralpak OD-H column, hexane/*i*-PrOH = 90/10, flow rate 0.8 mL/min, UV detection at 254 nm), Rt (major) = 10.07 min; Rt (minor) = 21.05 min

[α]<sub>D</sub><sup>20</sup> = -10.6 (c = 1.0, CHCl<sub>3</sub>)

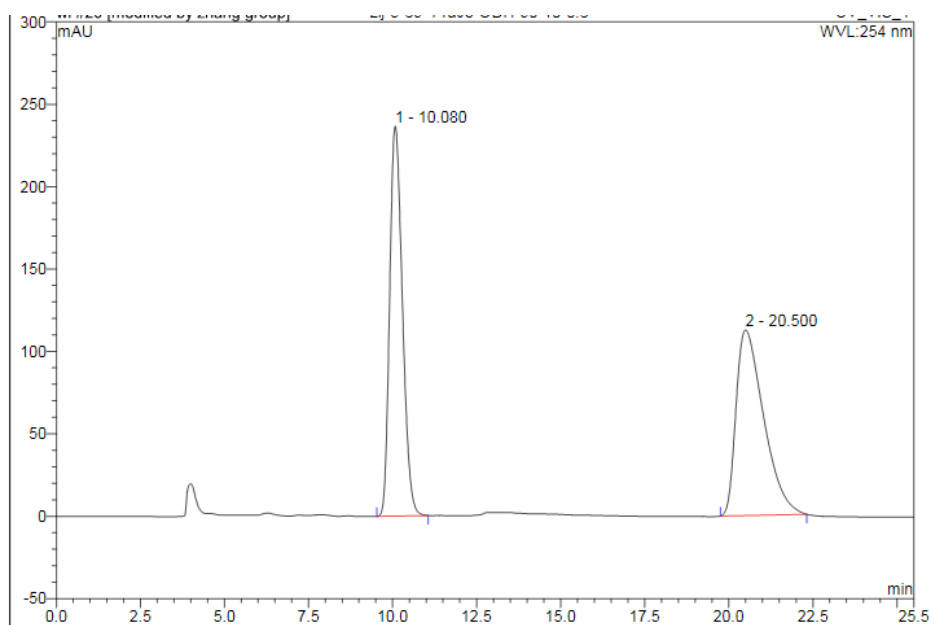

| No.           | Ret.Time<br>min | Peak Name | Height<br>mAU | Area<br>mAU*min | Rel.Area<br>% | Amount | Type |
|---------------|-----------------|-----------|---------------|-----------------|---------------|--------|------|
| 1             | 10.08           | n.a.      | 236.616       | 103.769         | 49.24         | n.a.   | BMB* |
| 2             | 20.50           | n.a.      | 112.576       | 106.955         | 50.76         | n.a.   | BMB* |
| <b>Total:</b> |                 |           | 349.192       | 210.724         | 100.00        | 0.000  |      |

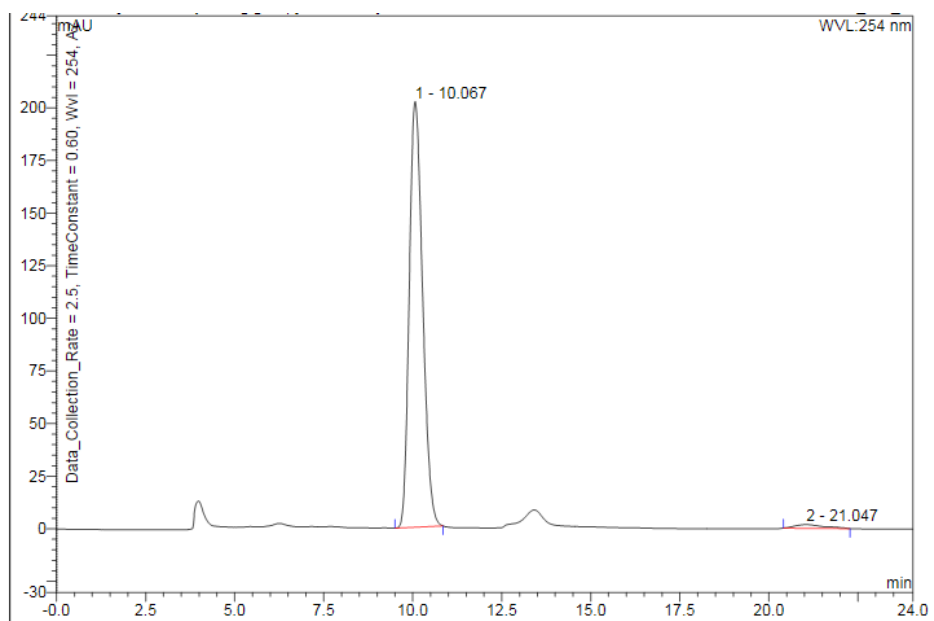

| No.           | Ret.Time<br>min | Peak Name | Height<br>mAU | Area<br>mAU*min | Rel.Area<br>% | Amount | Type |
|---------------|-----------------|-----------|---------------|-----------------|---------------|--------|------|
| 1             | 10.07           | n.a.      | 202.298       | 87.537          | 98.19         | n.a.   | BMB* |
| 2             | 21.05           | n.a.      | 1.687         | 1.615           | 1.81          | n.a.   | BMB* |
| <b>Total:</b> |                 |           | 203.985       | 89.152          | 100.00        | 0.000  |      |

## 2) (4R,5S,6S)-ethyl

**5-((E)-3-(4-bromophenyl)-3-oxoprop-1-en-1-yl)-2,4-diphenyl-4,5,6,7-tetrahydrobenzofuran-6-carboxylate (6)**

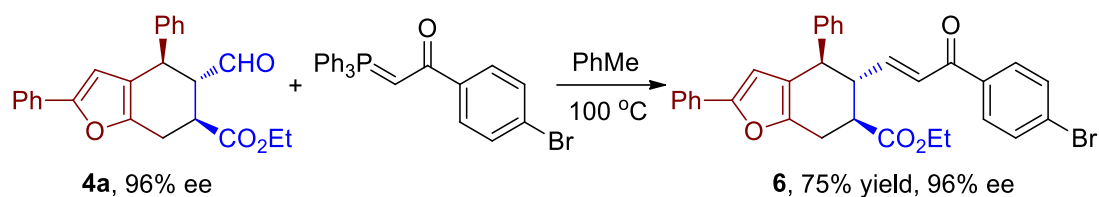

A stirred solution of **4a** (0.2 mmol) in toluene (2 mL) was added 1-(4-bromophenyl)-2-(triphenylphosphoranylidene)ethanone (0.4 mmol). The mixture was stirred at 100 °C for 12 h. After completion of the reaction, the reaction mixture was directly applied to a silica gel chromatography column to afford the desired **6** in 75% (83.1 mg) yield without loss of enantiopurity.

$^1\text{H}$  NMR (500 MHz,  $\text{CDCl}_3$ )  $\delta$  7.56 (d,  $J = 7.2$  Hz, 2H), 7.52 (d,  $J = 8.7$  Hz, 2H), 7.47 (d,  $J = 8.7$  Hz, 2H), 7.36 – 7.27 (m, 4H), 7.22 (dt,  $J = 13.6, 5.5$  Hz, 2H), 7.17 – 7.10 (m, 2H), 6.84 (dd,  $J = 15.4, 9.8$  Hz, 1H), 6.35 (d,  $J = 15.3$  Hz, 1H), 6.15 (s, 1H), 4.08 (q,  $J = 7.0$  Hz, 2H), 3.83 – 3.76 (m, 1H), 3.23 – 3.17 (m, 1H), 3.15 – 3.06 (m, 2H), 2.90 (q,  $J = 10.0$  Hz, 1H), 1.18 (t,  $J = 7.1$  Hz, 3H).

$^{13}\text{C}$  NMR (126 MHz,  $\text{CDCl}_3$ )  $\delta$  188.9, 173.4, 153.1, 148.0, 147.1, 141.7, 136.2, 131.8, 130.8, 130.0, 128.8, 128.6, 128.5, 128.3, 128.0, 127.1, 127.1, 123.4, 121.3, 105.4, 61.0, 50.1, 45.8, 45.7, 26.2, 14.1.

**HRMS** (ESI,  $m/z$ ):  $[\text{M}+\text{NH}_4^+]$  calcd. for  $\text{C}_{32}\text{H}_{31}\text{BrNO}_4$  572.1431, found 572.1424.

**HPLC analysis:** 96% ee (Chiralpak AD-H column, hexane/*i*-PrOH = 90/10, flow rate 0.5 mL/min, UV detection at 254 nm),  $R_t$  (major) = 30.20 min;  $R_t$  (minor) = 40.55 min

$[\alpha]_{\text{D}}^{20} = -6.7$  ( $c = 0.50$ ,  $\text{CHCl}_3$ )

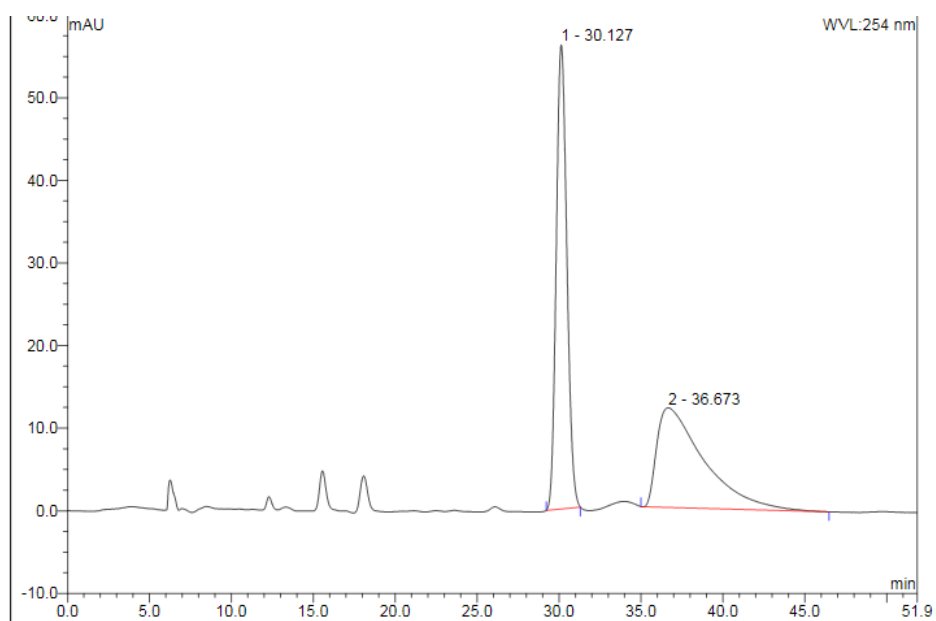

| No.    | Ret.Time<br>min | Peak Name | Height<br>mAU | Area<br>mAU*min | Rel.Area<br>% | Amount | Type |
|--------|-----------------|-----------|---------------|-----------------|---------------|--------|------|
| 1      | 30.13           | n.a.      | 56.196        | 42.163          | 51.29         | n.a.   | BMB* |
| 2      | 36.67           | n.a.      | 12.036        | 40.043          | 48.71         | n.a.   | BMB* |
| Total: |                 |           | 68.232        | 82.206          | 100.00        | 0.000  |      |

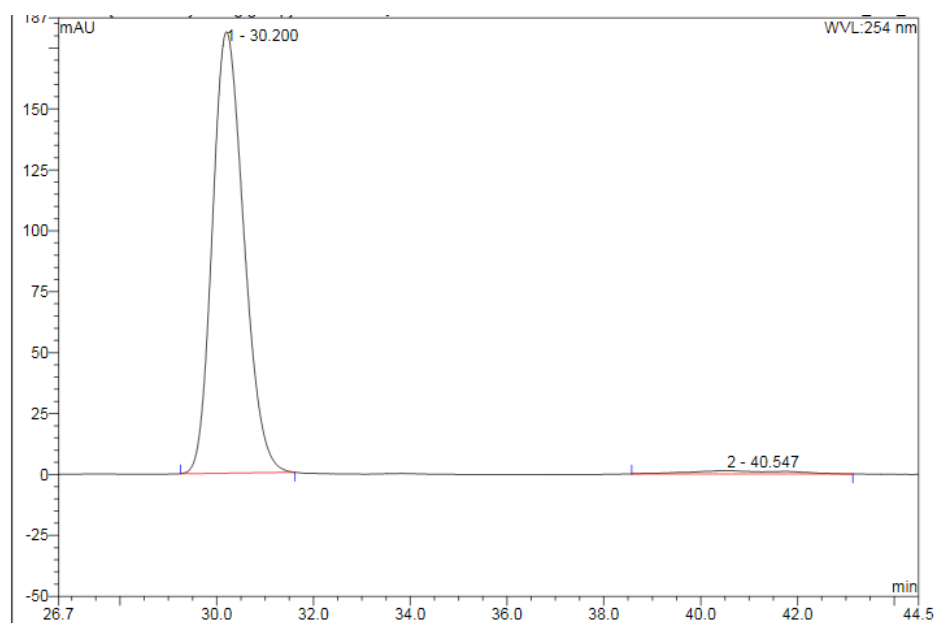

| No.    | Ret.Time<br>min | Peak Name | Height<br>mAU | Area<br>mAU*min | Rel.Area<br>% | Amount | Type |
|--------|-----------------|-----------|---------------|-----------------|---------------|--------|------|
| 1      | 30.20           | n.a.      | 181.052       | 136.225         | 97.84         | n.a.   | BMB* |
| 2      | 40.55           | n.a.      | 1.320         | 3.001           | 2.16          | n.a.   | BMB* |
| Total: |                 |           | 182.372       | 139.226         | 100.00        | 0.000  |      |

### 3) (4R,5S,6S)-ethyl

5-(2,2-dibromovinyl)-2,4-diphenyl-4,5,6,7-tetrahydrobenzofuran-6-carboxylate (7)

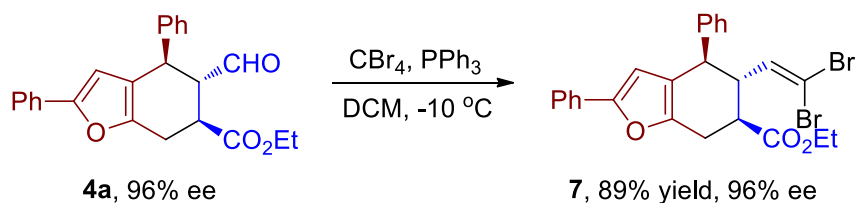

To a solution of **4a** (0.2 mmol) and  $\text{CBr}_4$  (0.3 mmol) in DCM (2 mL) at  $-10\text{ }^\circ\text{C}$  was added dropwise a solution of  $\text{PPh}_3$  (0.6 mmol) in DCM (2 mL) by syringe. The addition rate was controlled so that the internal temperature was subzero. After addition, the mixture was stirred for another 0.5 h before warmed to rt and stirred for another 1 h. Then the reaction mixture was directly applied to a silica gel chromatography column to afford the desired **7** in 89% (94.1 mg) yield without loss of enantiopurity.

$^1\text{H}$  NMR (500 MHz,  $\text{CDCl}_3$ )  $\delta$  7.56 (dd,  $J = 8.3, 1.1$  Hz, 2H), 7.36 – 7.26 (m, 5H), 7.23 – 7.18 (m, 1H), 7.18 – 7.14 (m, 2H), 6.32 (d,  $J = 10.2$  Hz, 1H), 6.18 (s, 1H), 4.19 – 4.06 (m, 2H), 3.68 (d,  $J = 9.1$  Hz, 1H), 3.25 (ddd,  $J = 16.4, 10.5, 2.8$  Hz, 1H), 3.12 – 3.00 (m, 2H), 2.94 (td,  $J = 10.6, 5.5$  Hz, 1H), 1.27 (t,  $J = 7.1$  Hz, 3H).

$^{13}\text{C}$  NMR (126 MHz,  $\text{CDCl}_3$ )  $\delta$  172.8, 153.0, 148.2, 140.9, 137.7, 130.8, 128.9, 128.6, 128.3, 127.1, 123.4, 120.9, 105.4, 92.1, 61.1, 50.2, 45.3, 45.2, 25.8, 14.2

**HRMS** (ESI,  $m/z$ ):  $[\text{M}+\text{H}]^+$  calcd. for  $\text{C}_{25}\text{H}_{23}\text{Br}_2\text{O}_3$  529.0008, found 529.0020

**HPLC analysis:** 96% ee (Chiralpak AD-H column, hexane/*i*-PrOH = 90/10, flow rate 0.5 mL/min, UV detection at 254 nm),  $R_t$  (minor) = 9.43 min;  $R_t$  (major) = 12.25 min  
 $[\alpha]_{\text{D}}^{20} = -9.8$  ( $c = 0.50$ ,  $\text{CHCl}_3$ )

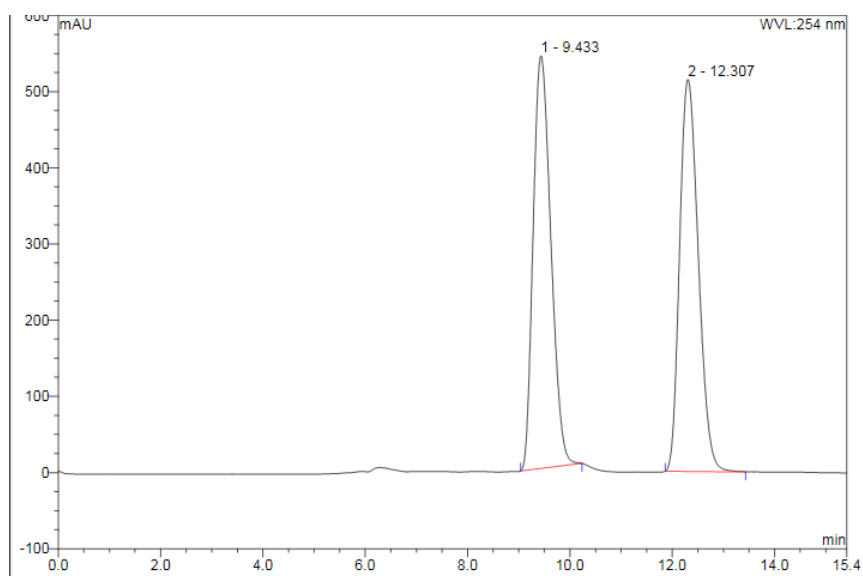

| No.    | Ret.Time<br>min | Peak Name | Height<br>mAU | Area<br>mAU*min | Rel.Area<br>% | Amount | Type |
|--------|-----------------|-----------|---------------|-----------------|---------------|--------|------|
| 1      | 9.43            | n.a.      | 541.504       | 216.962         | 49.94         | n.a.   | BMB* |
| 2      | 12.31           | n.a.      | 514.474       | 217.524         | 50.06         | n.a.   | BMB* |
| Total: |                 |           | 1055.978      | 434.486         | 100.00        | 0.000  |      |

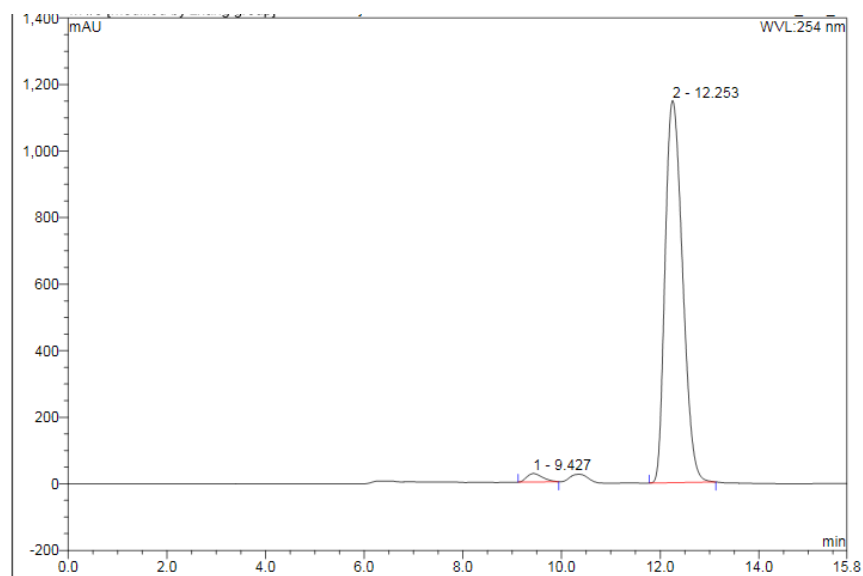

| No.    | Ret.Time<br>min | Peak Name | Height<br>mAU | Area<br>mAU*min | Rel.Area<br>% | Amount | Type |
|--------|-----------------|-----------|---------------|-----------------|---------------|--------|------|
| 1      | 9.43            | n.a.      | 25.446        | 9.488           | 1.98          | n.a.   | BMB* |
| 2      | 12.25           | n.a.      | 1148.766      | 469.428         | 98.02         | n.a.   | BMB* |
| Total: |                 |           | 1174.212      | 478.916         | 100.00        | 0.000  |      |

#### 4. X-ray crystallographic analysis

Product **4o** was crystallized as a colorless crystal *via* vaporization of a petrollium ether/EA solution, and its relative configuration was determined by x-ray structure analysis. The CCDC number was 1994848. The supplementary crystallographic data that could be obtained free of charge from The Cambridge Crystallographic Data Centre *via* [www.ccdc.cam.ac.uk/data\\_request/cif](http://www.ccdc.cam.ac.uk/data_request/cif).

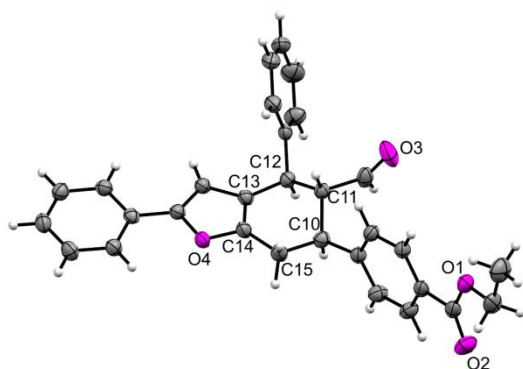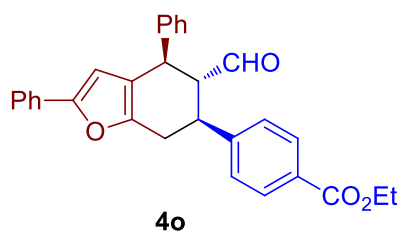

## 5. $^1\text{H}$ , $^{13}\text{C}$ NMR spectra

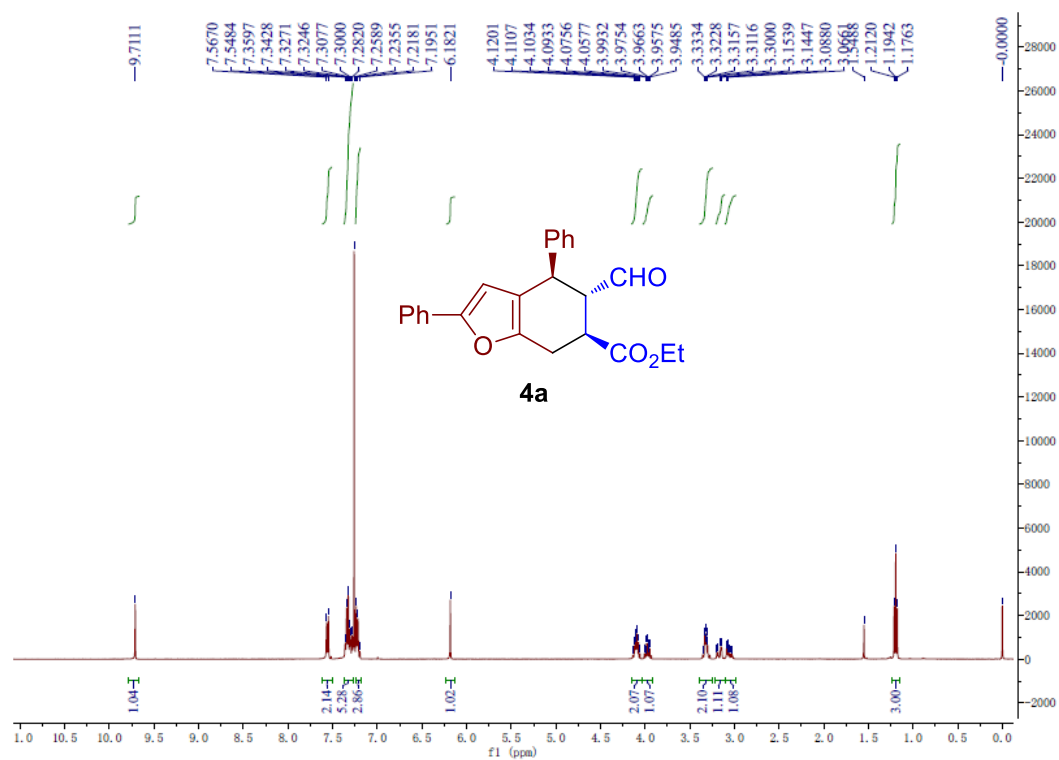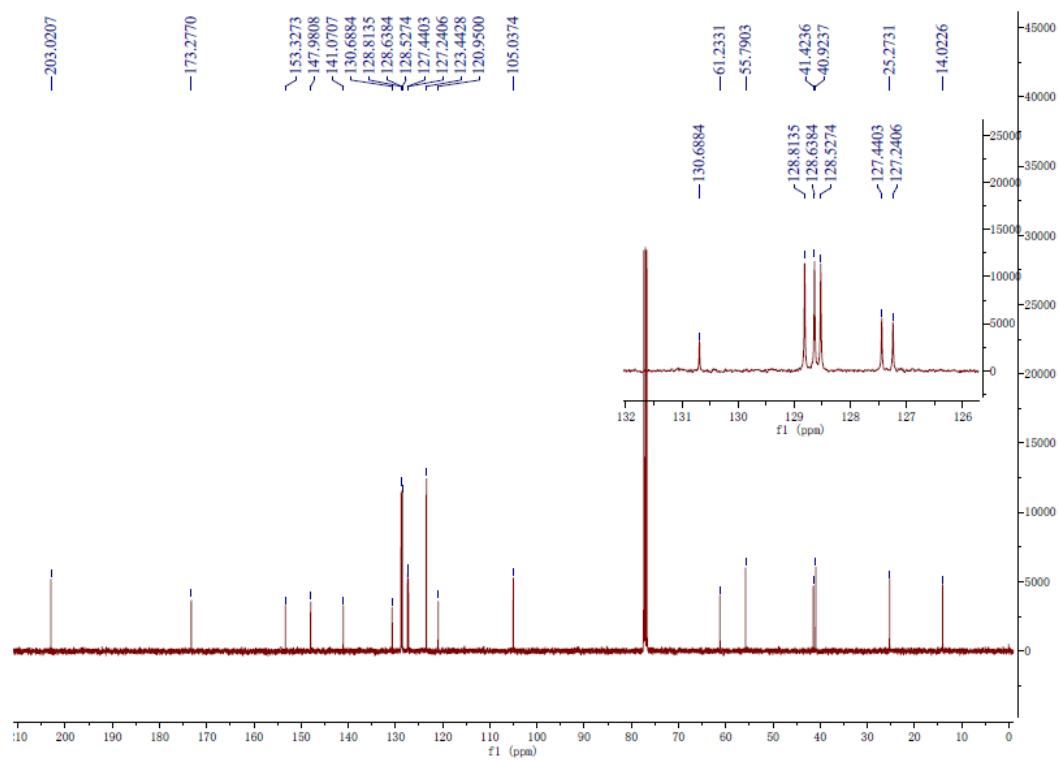

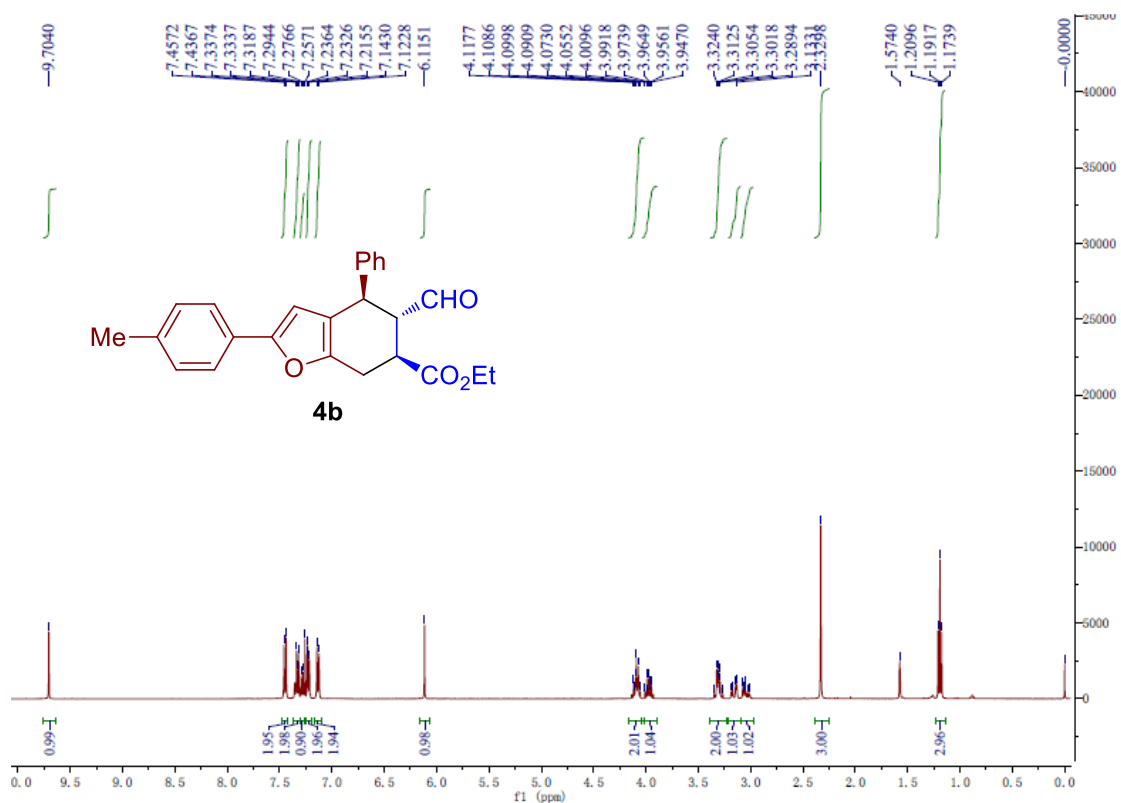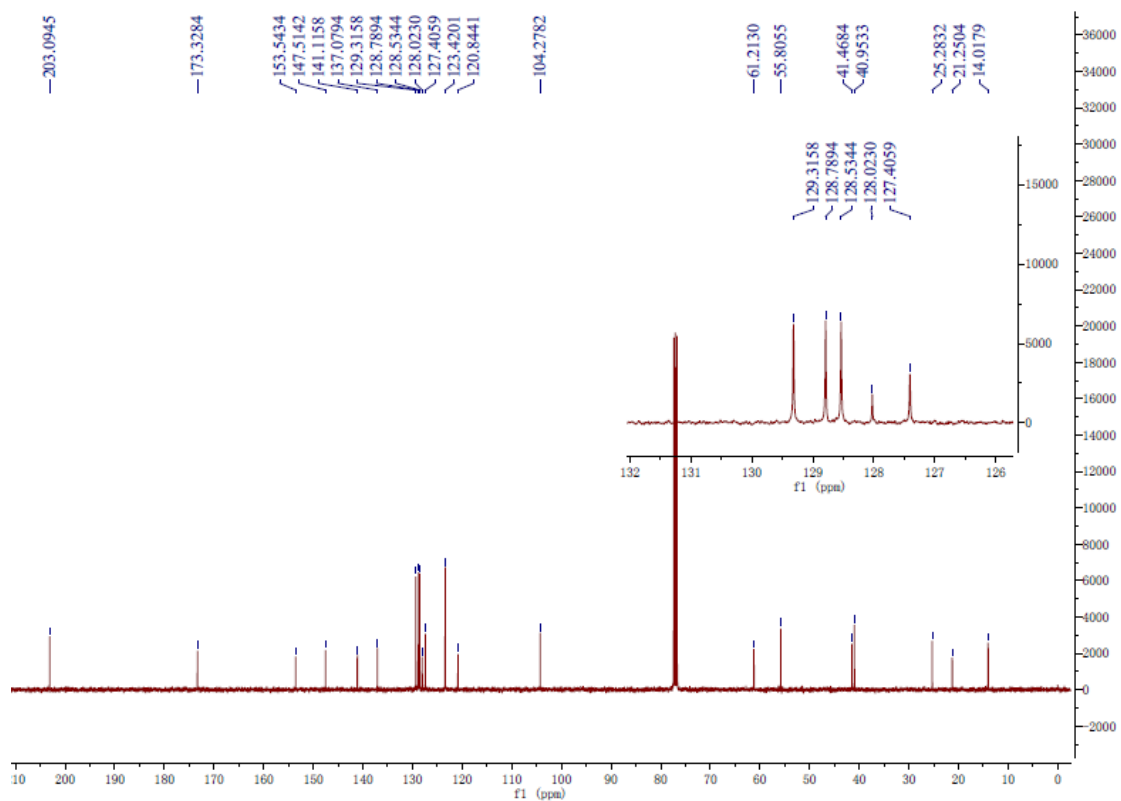

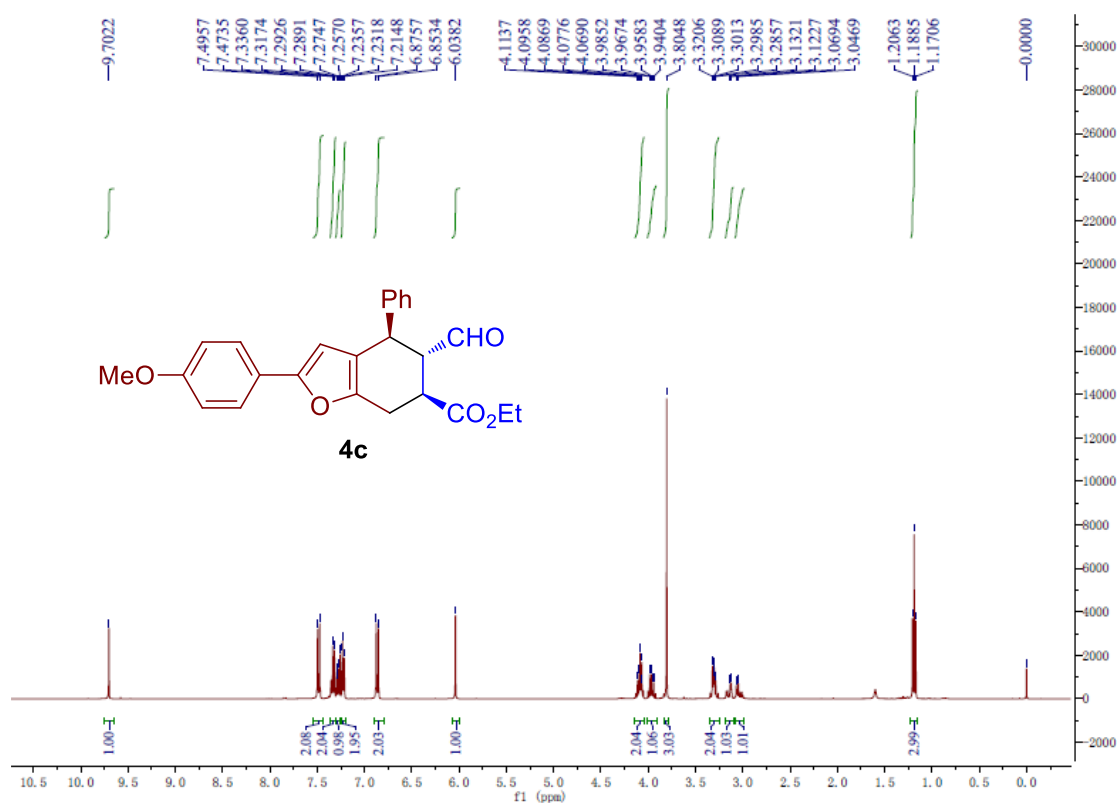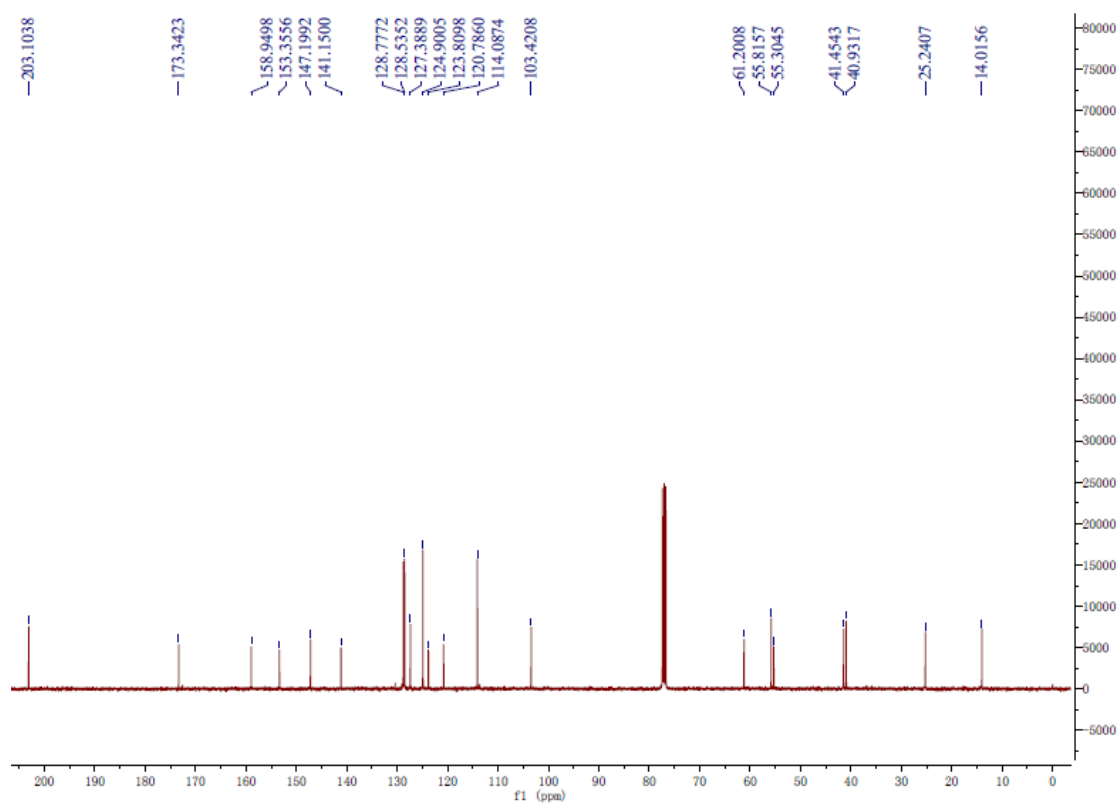

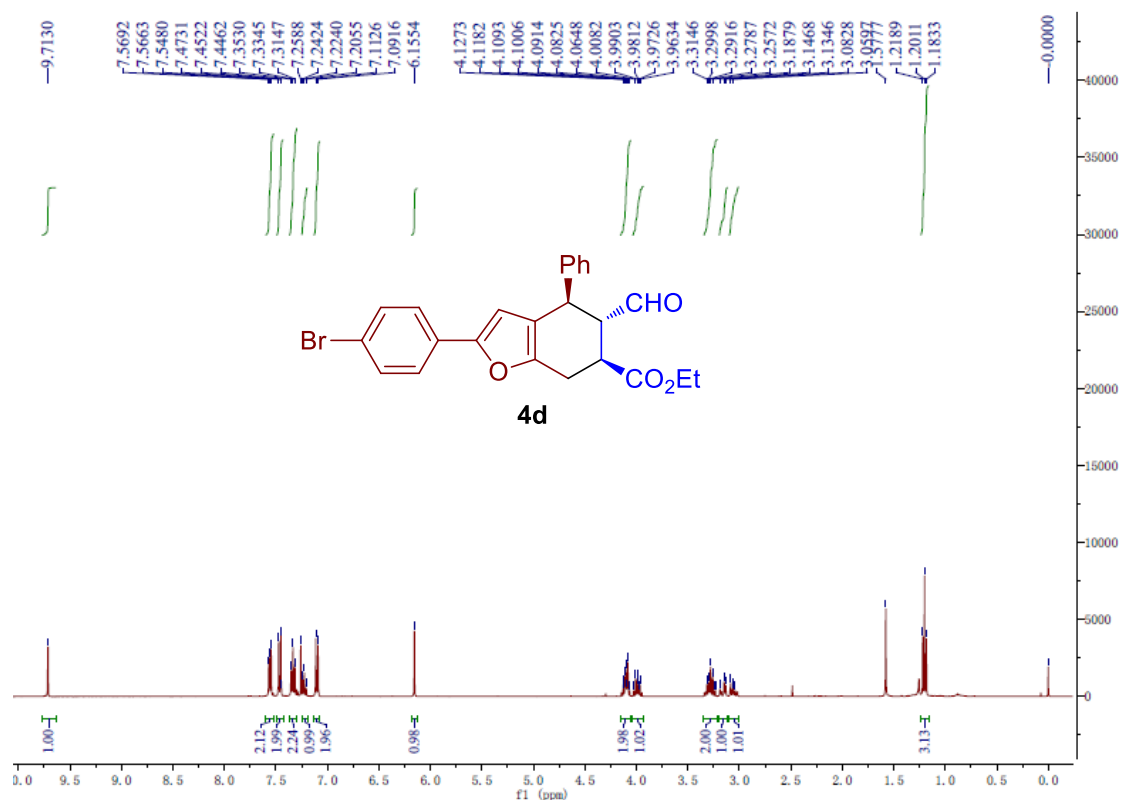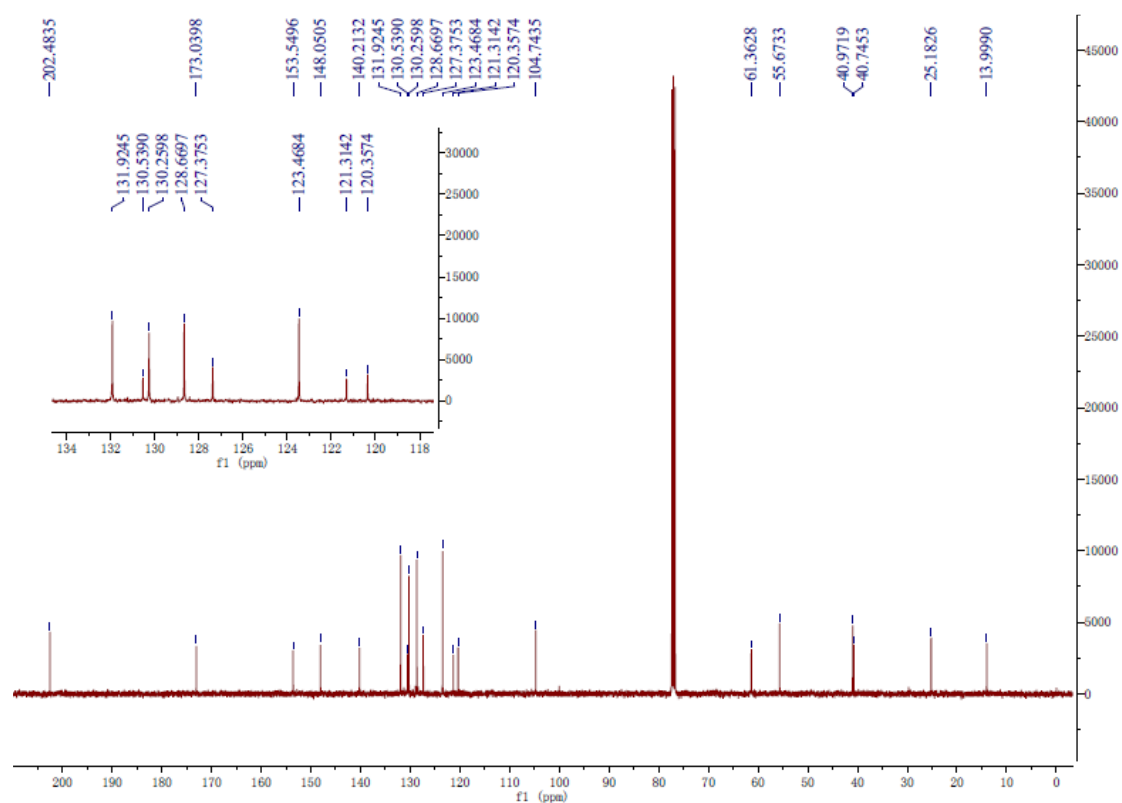

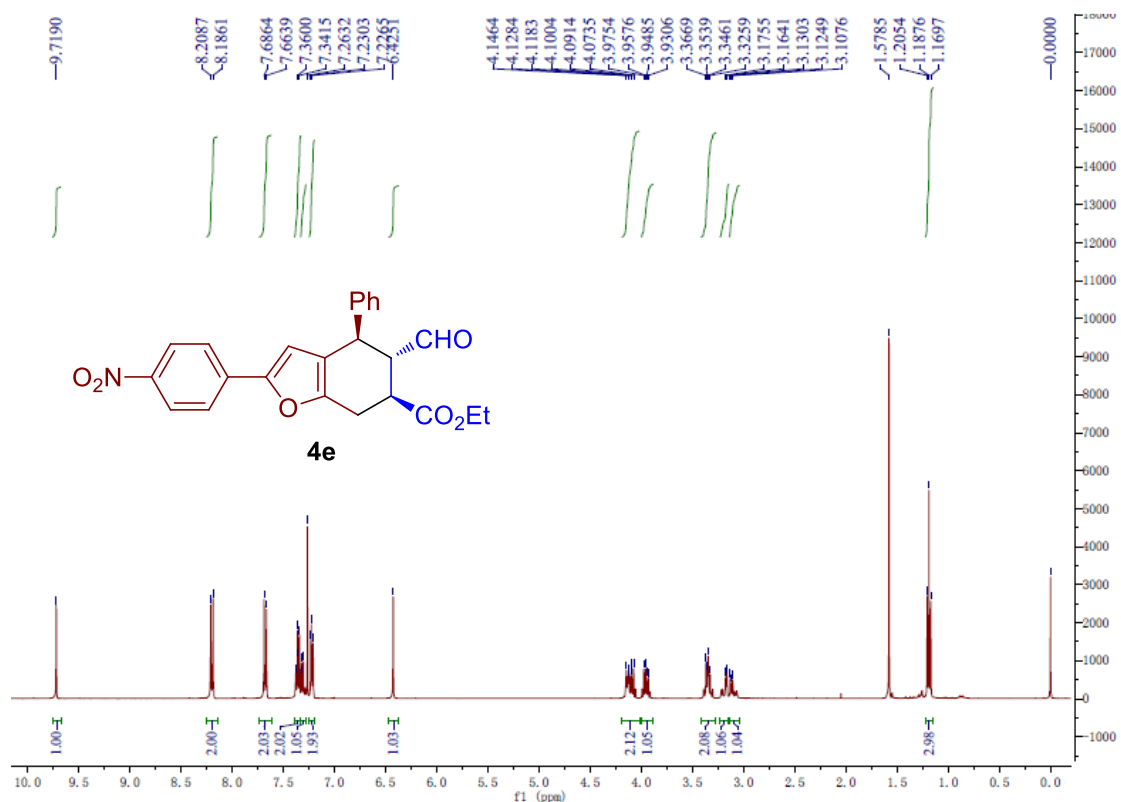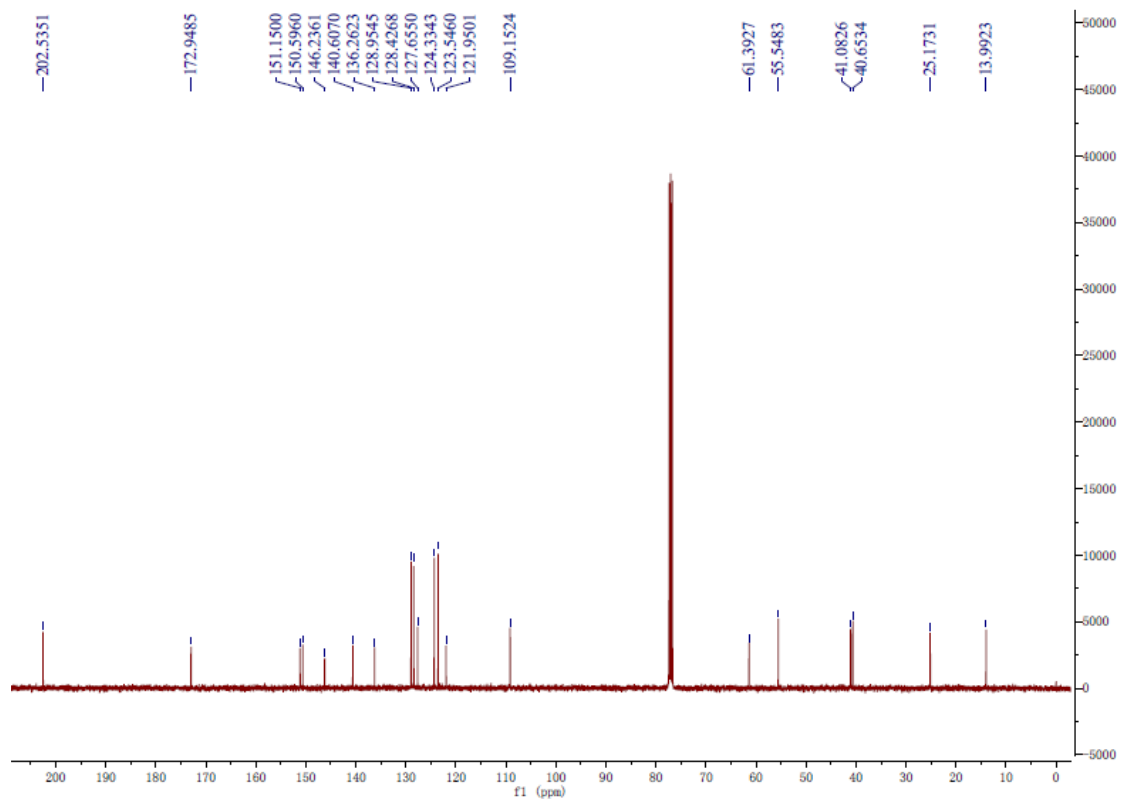

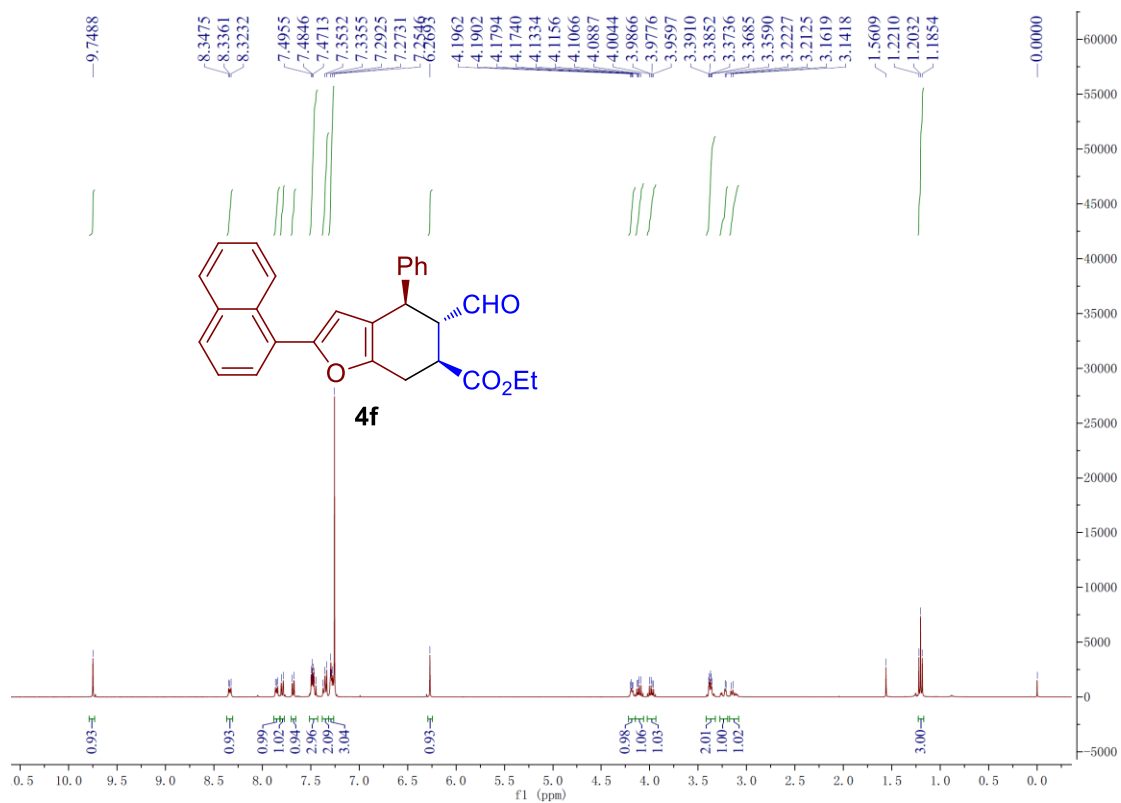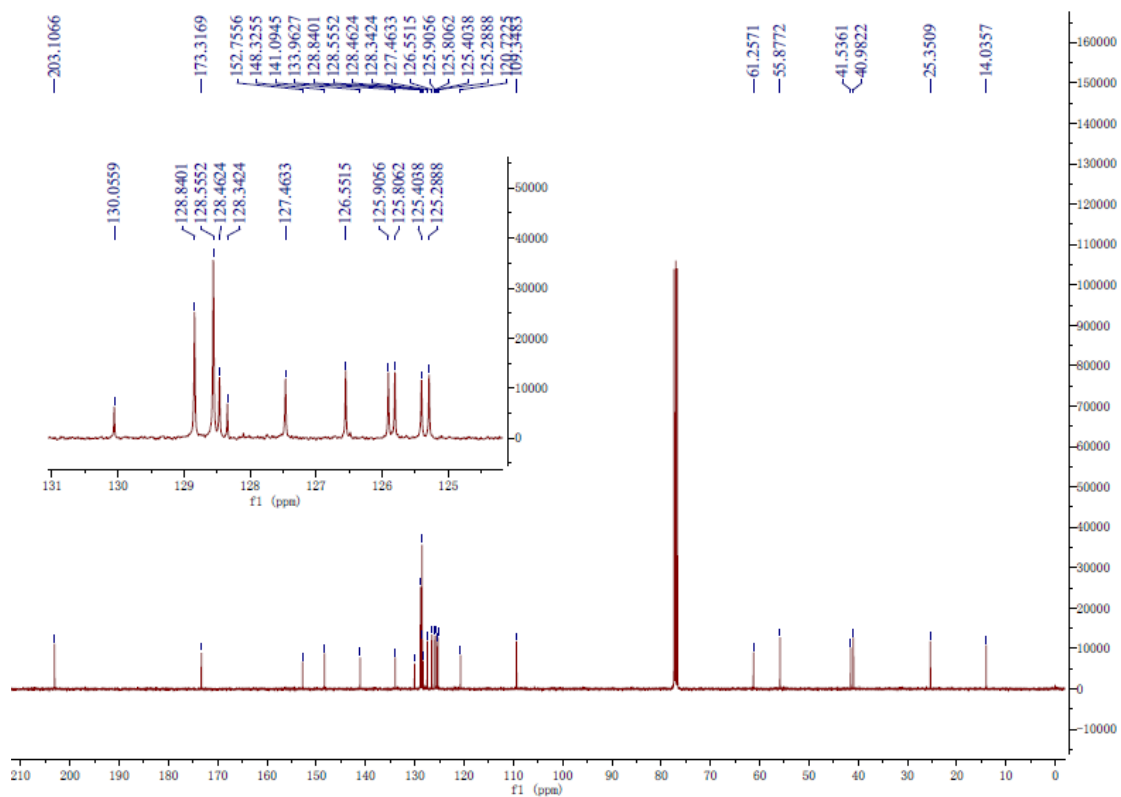

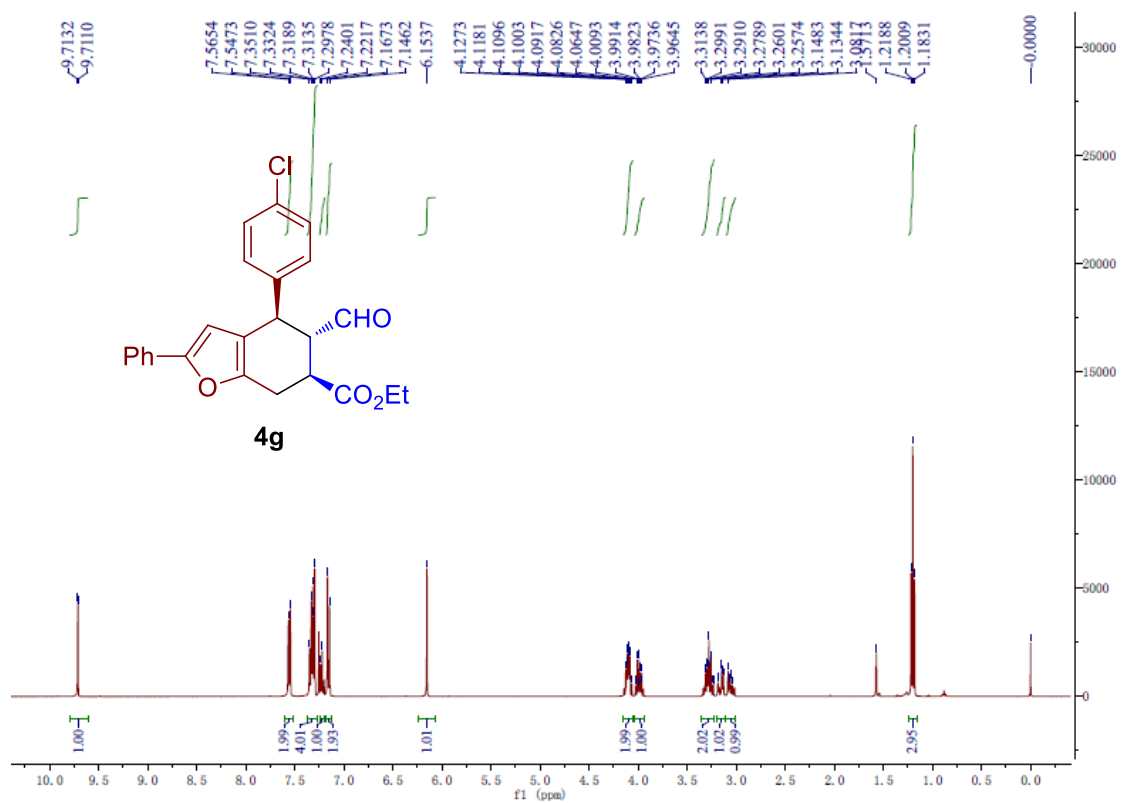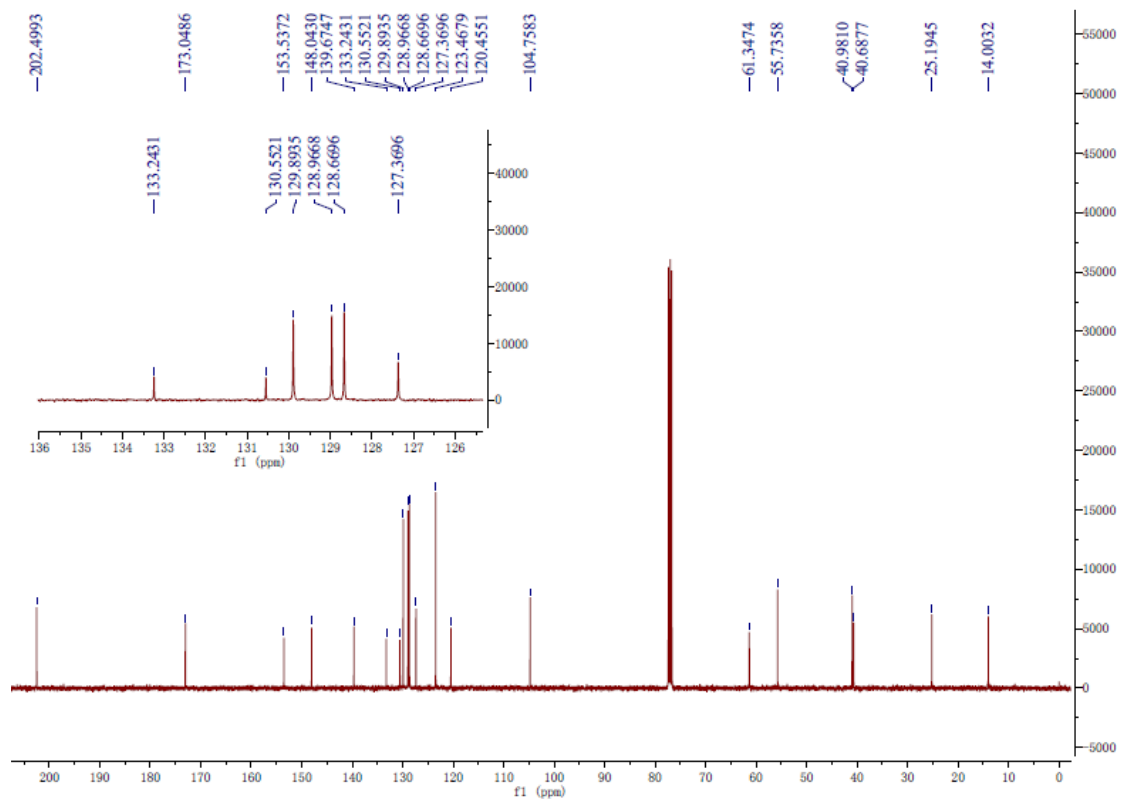

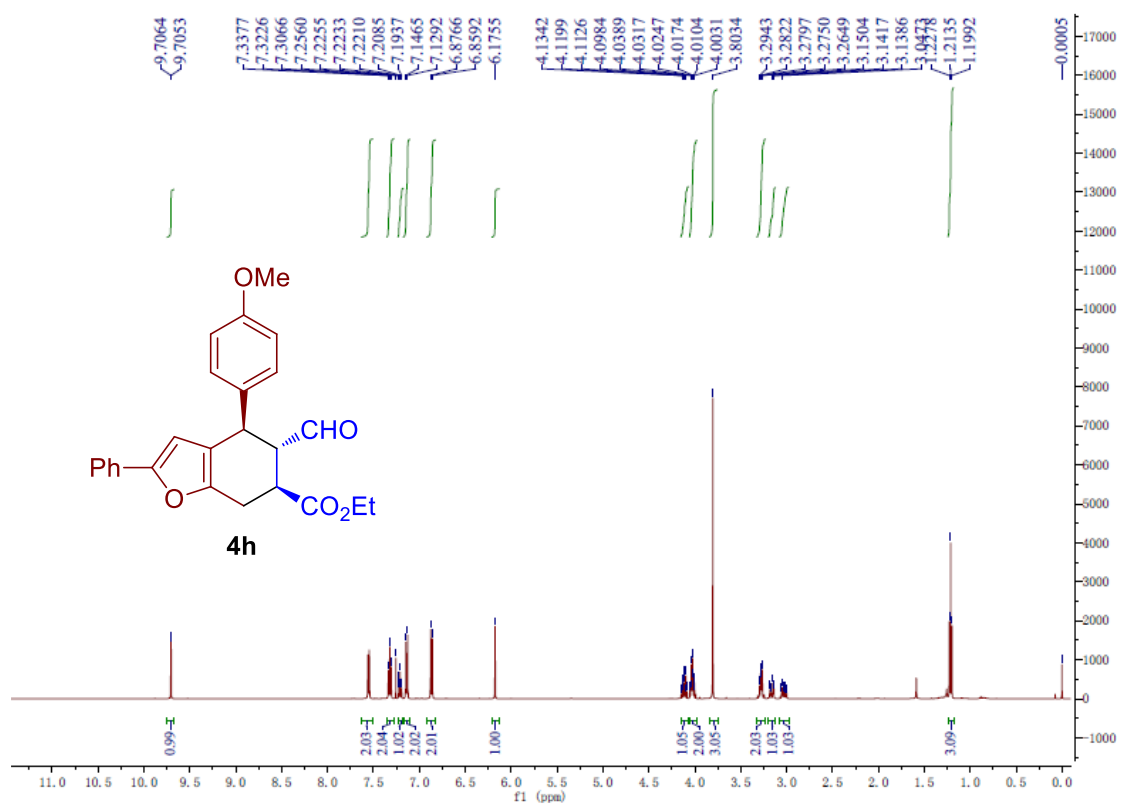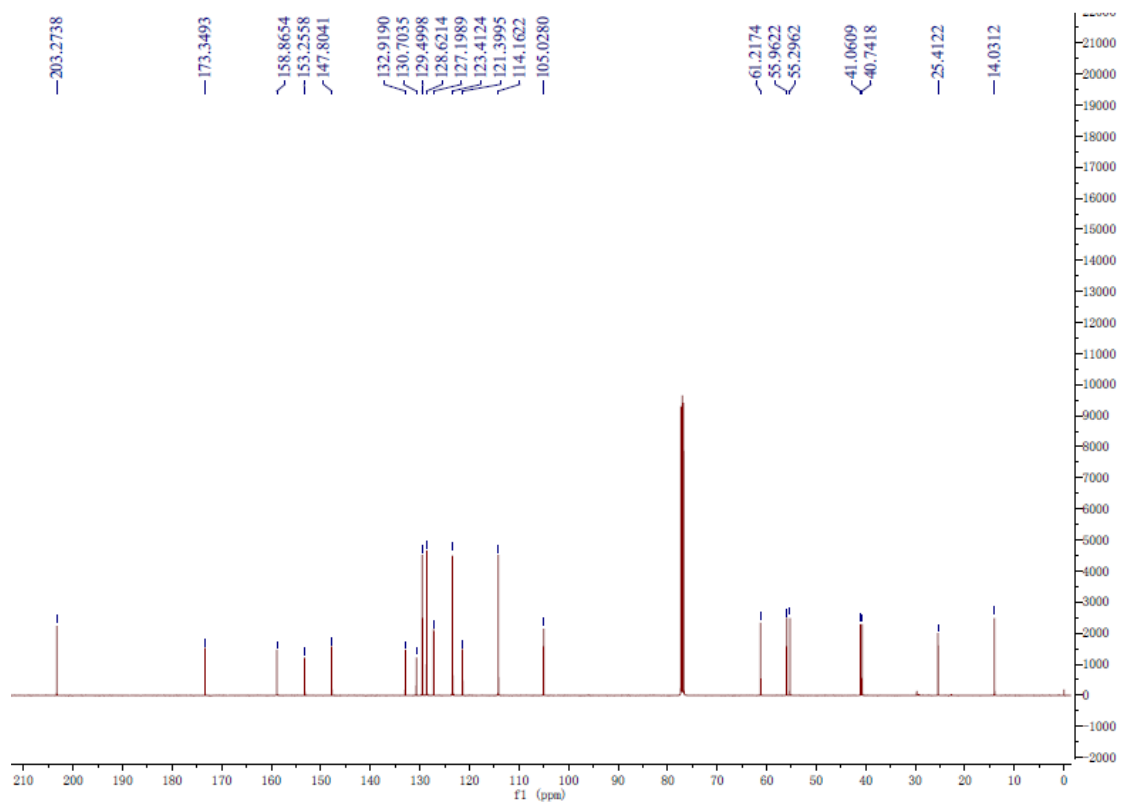

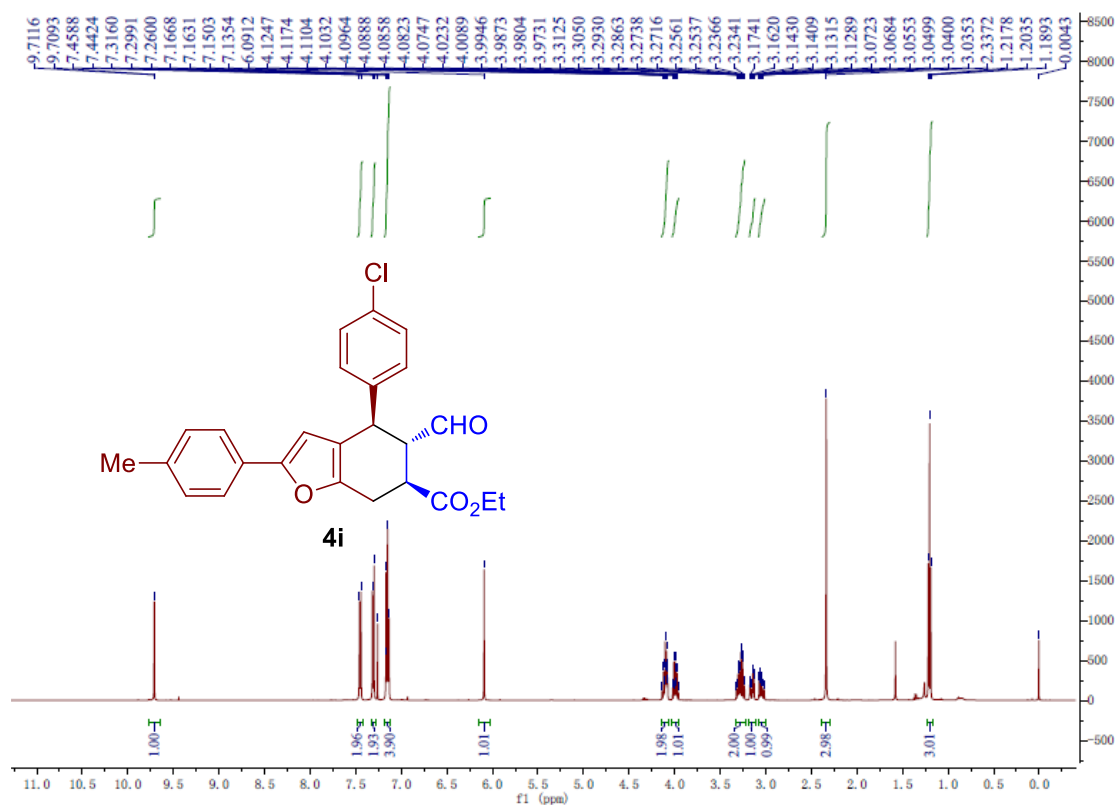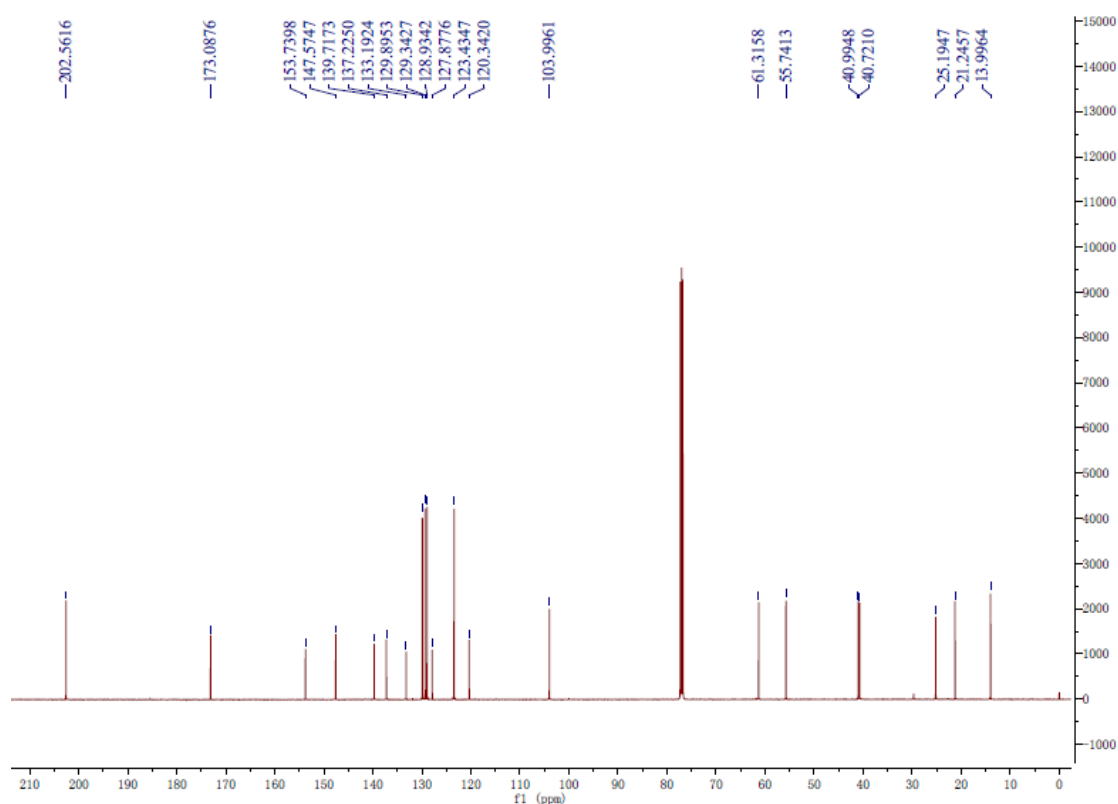

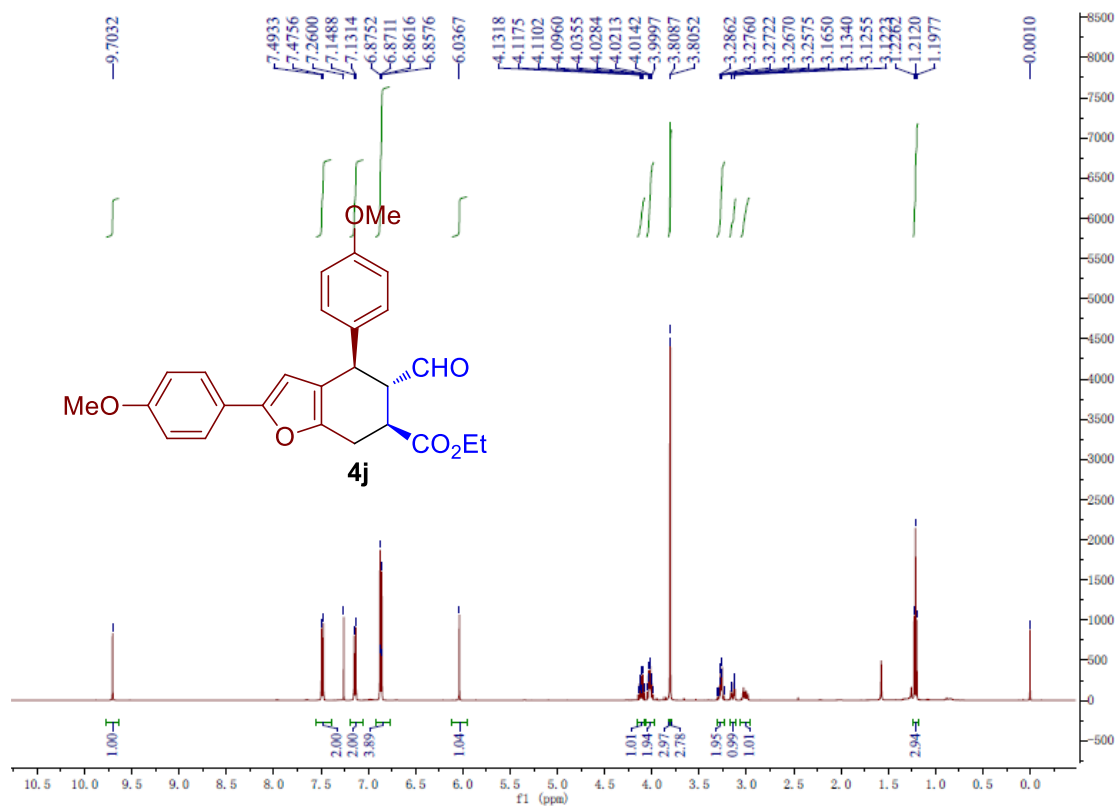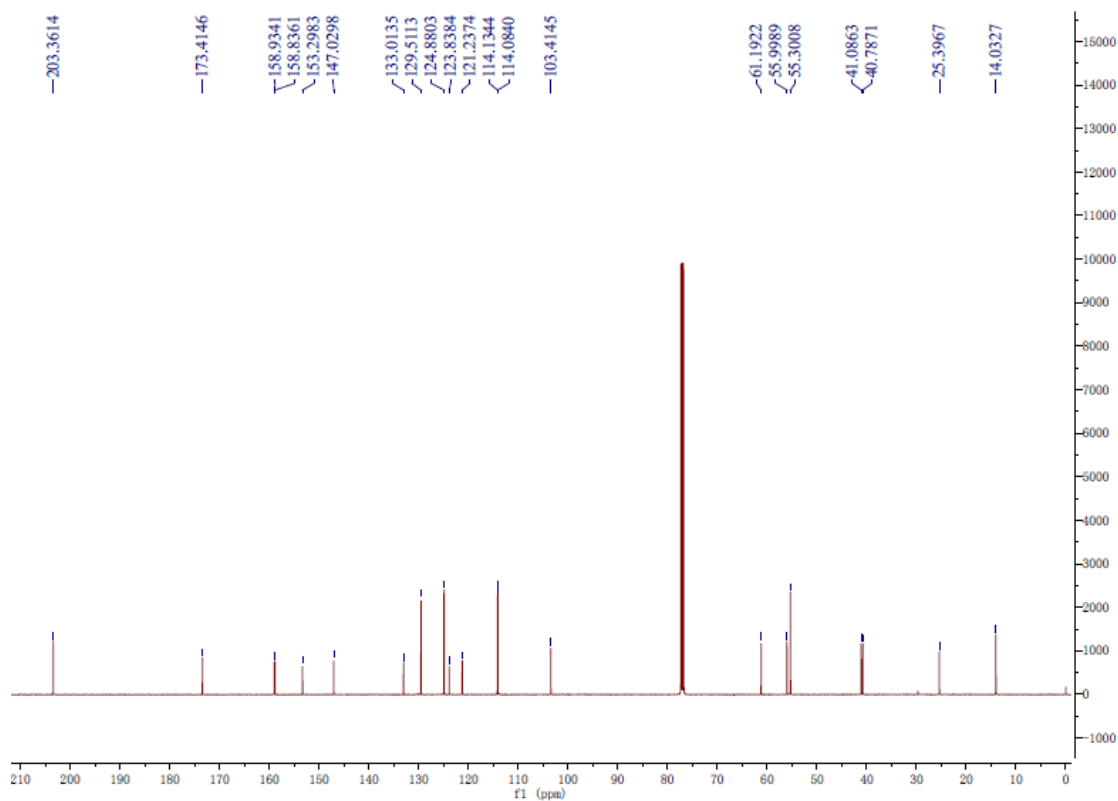

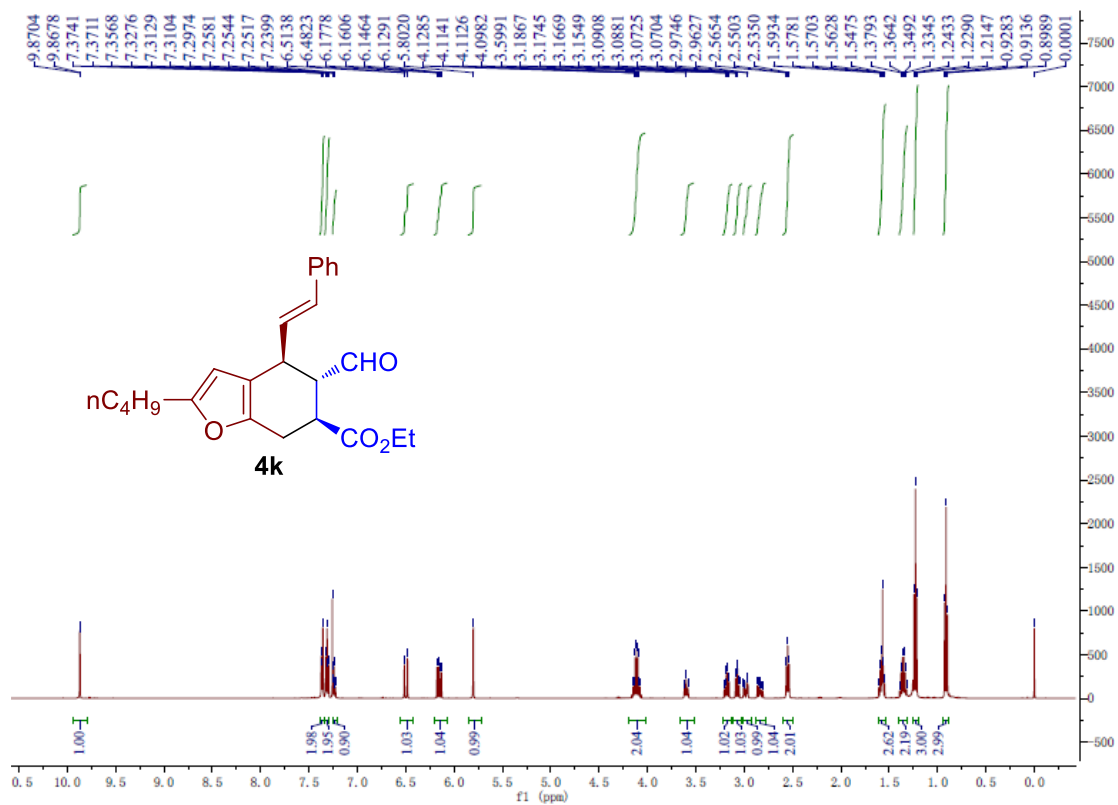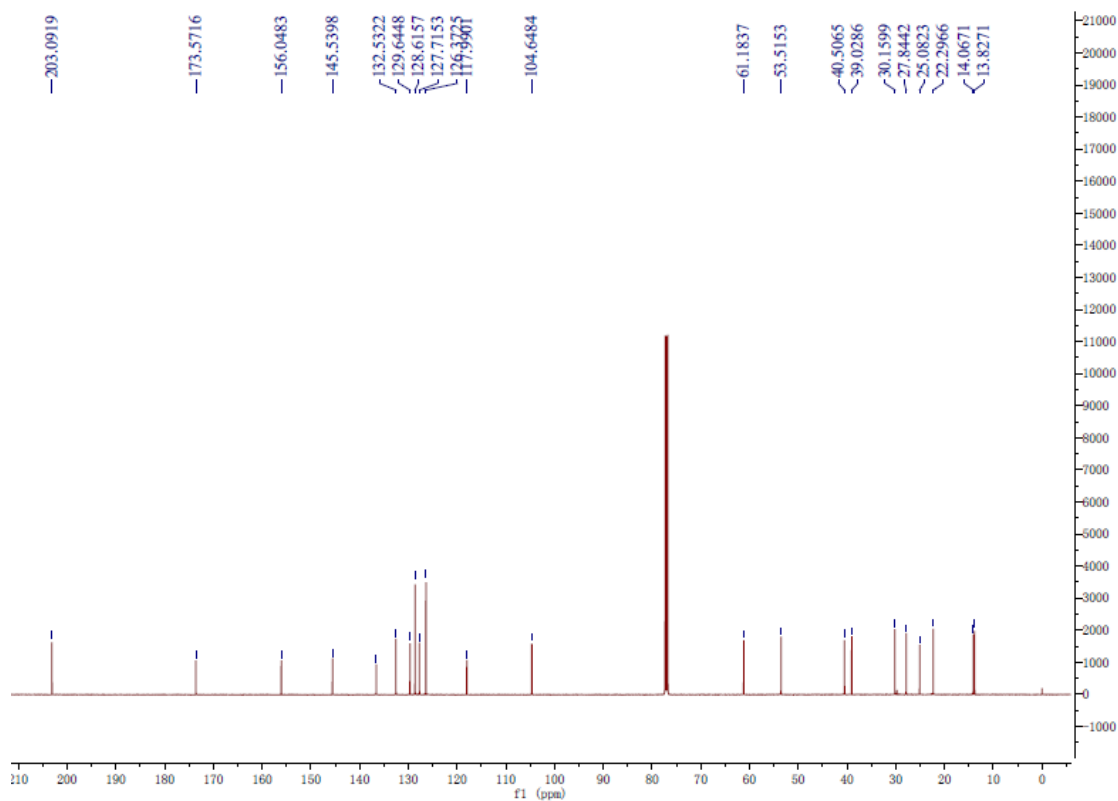

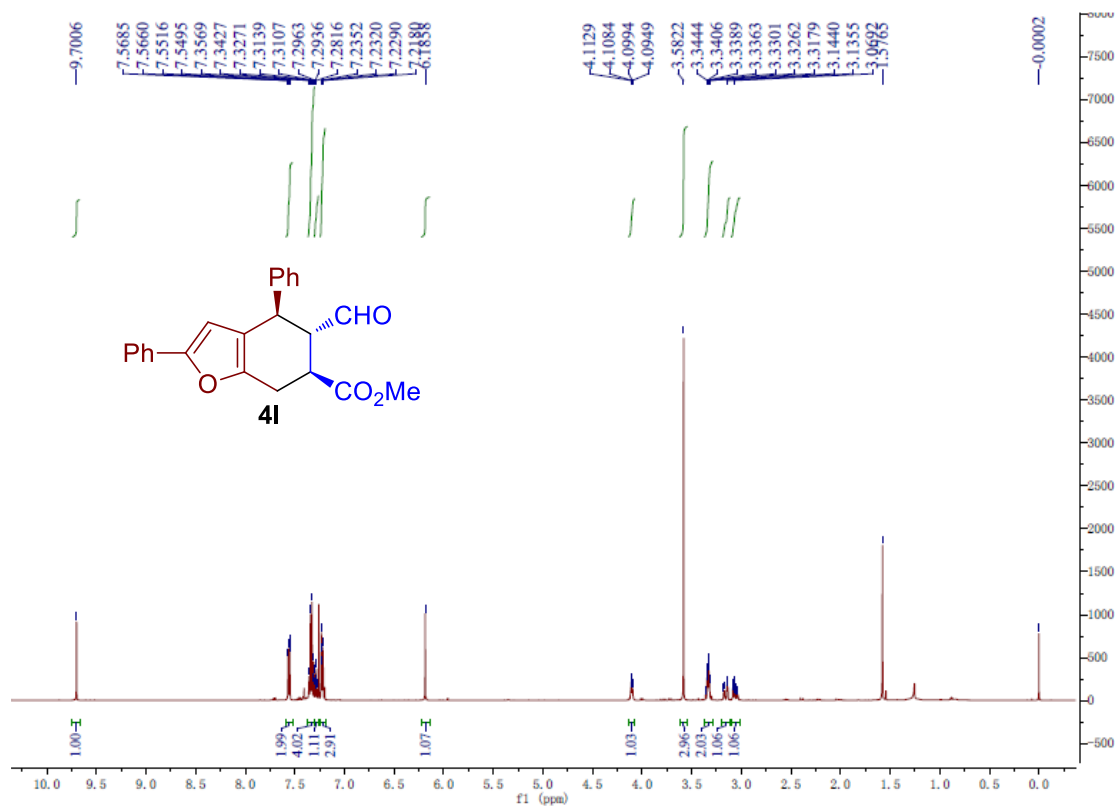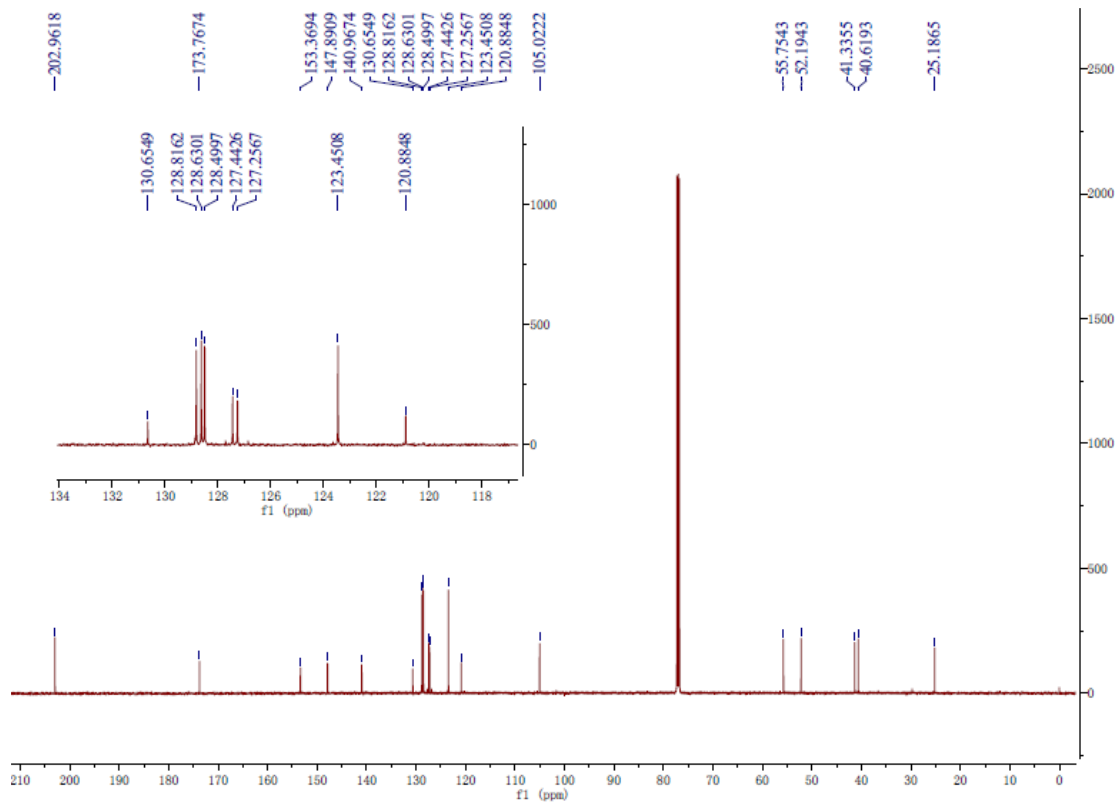

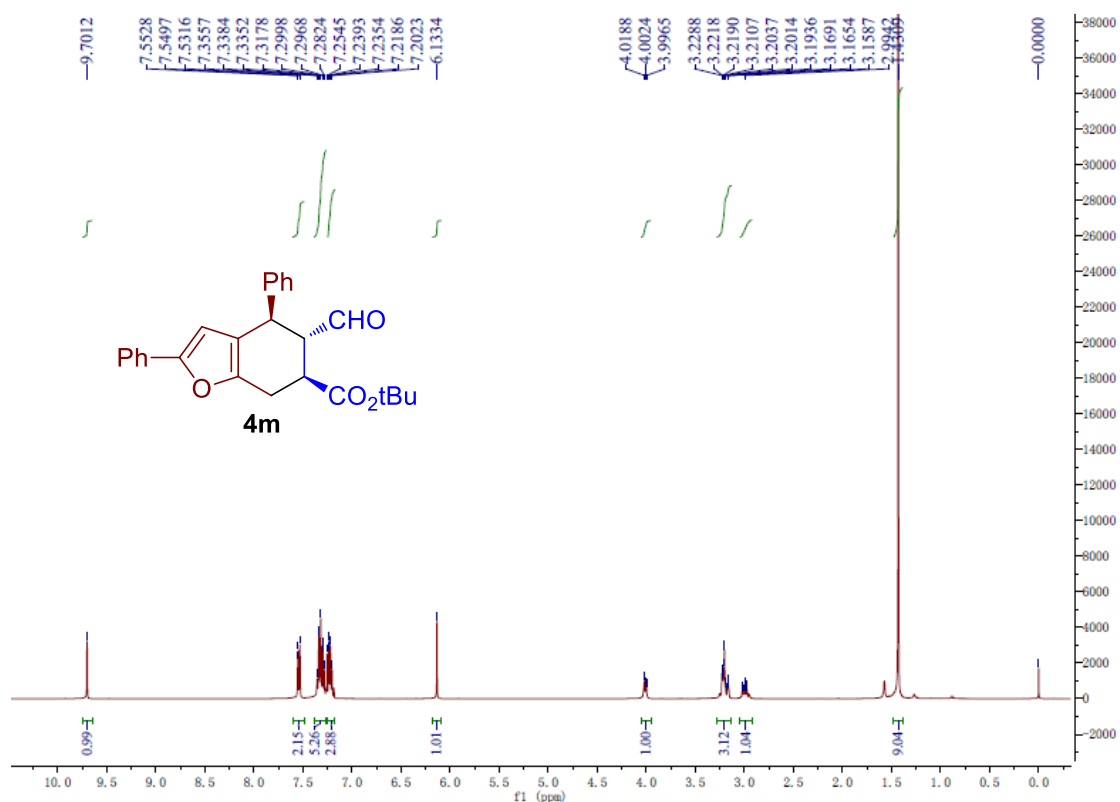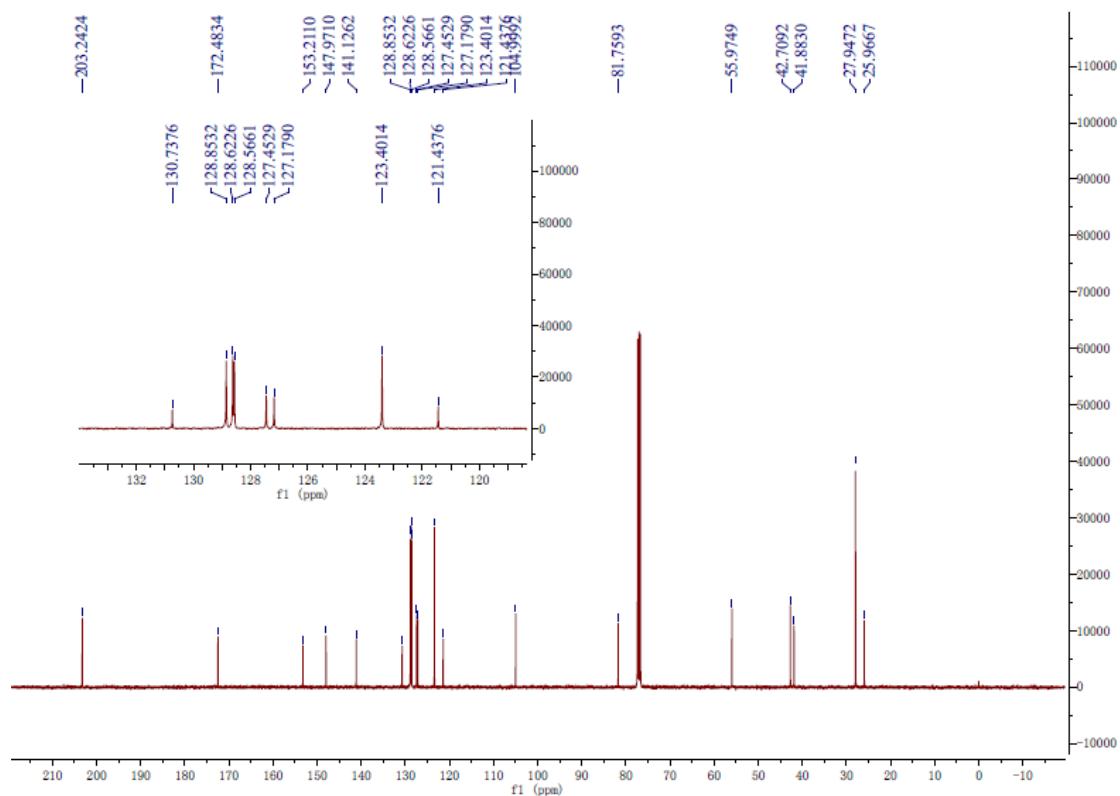

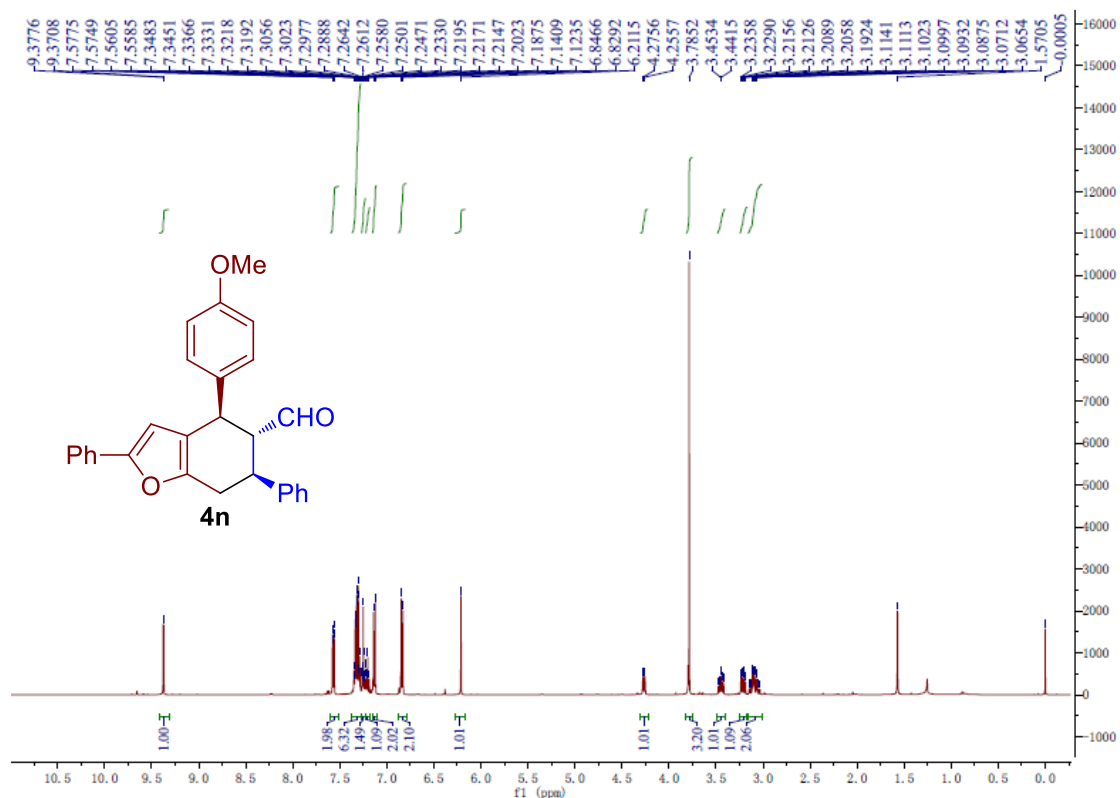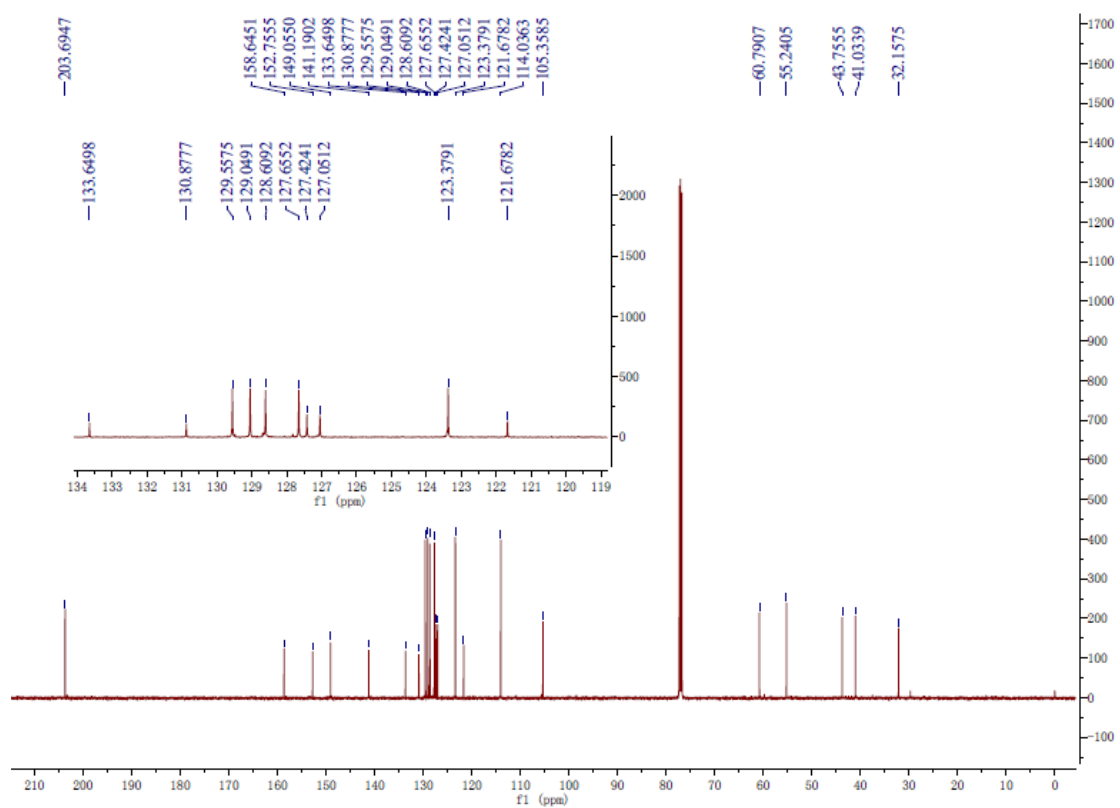

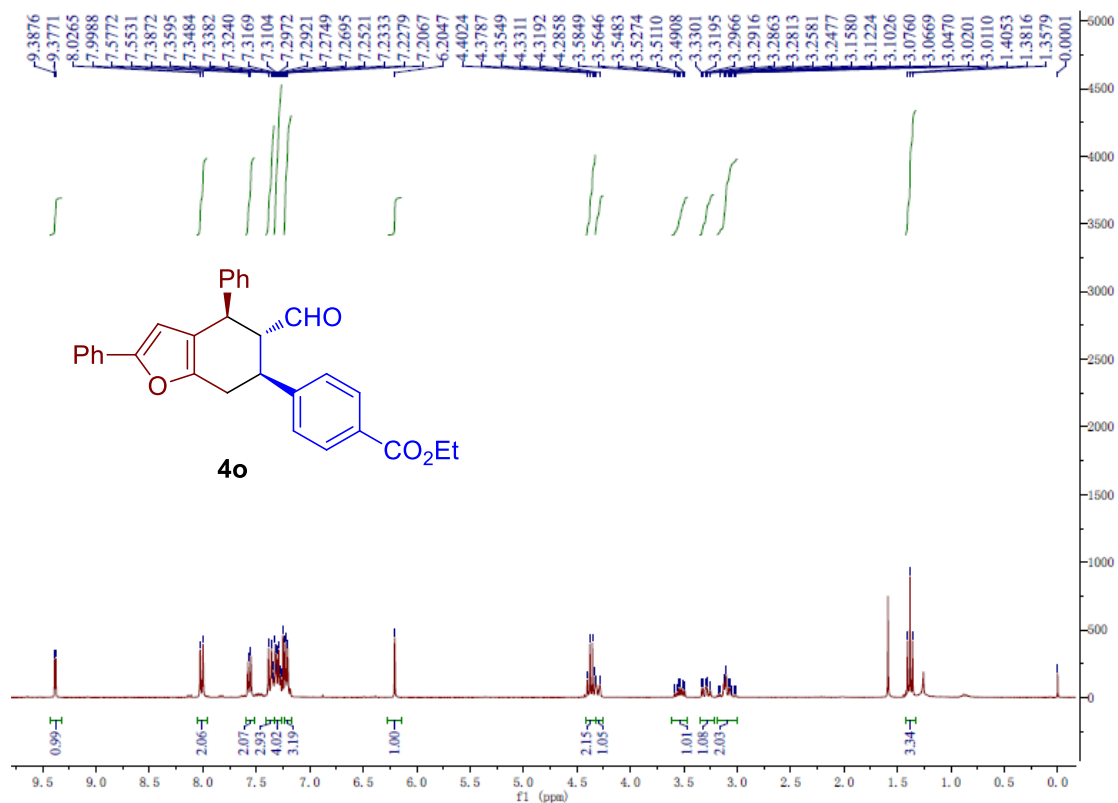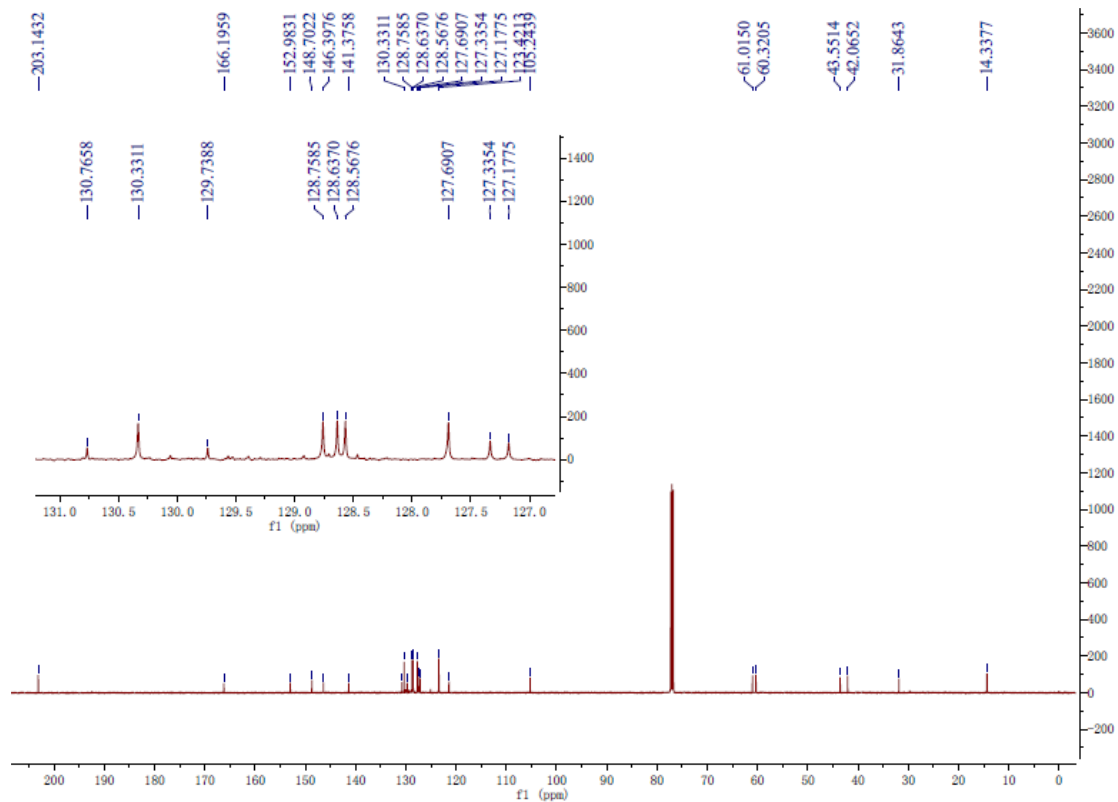

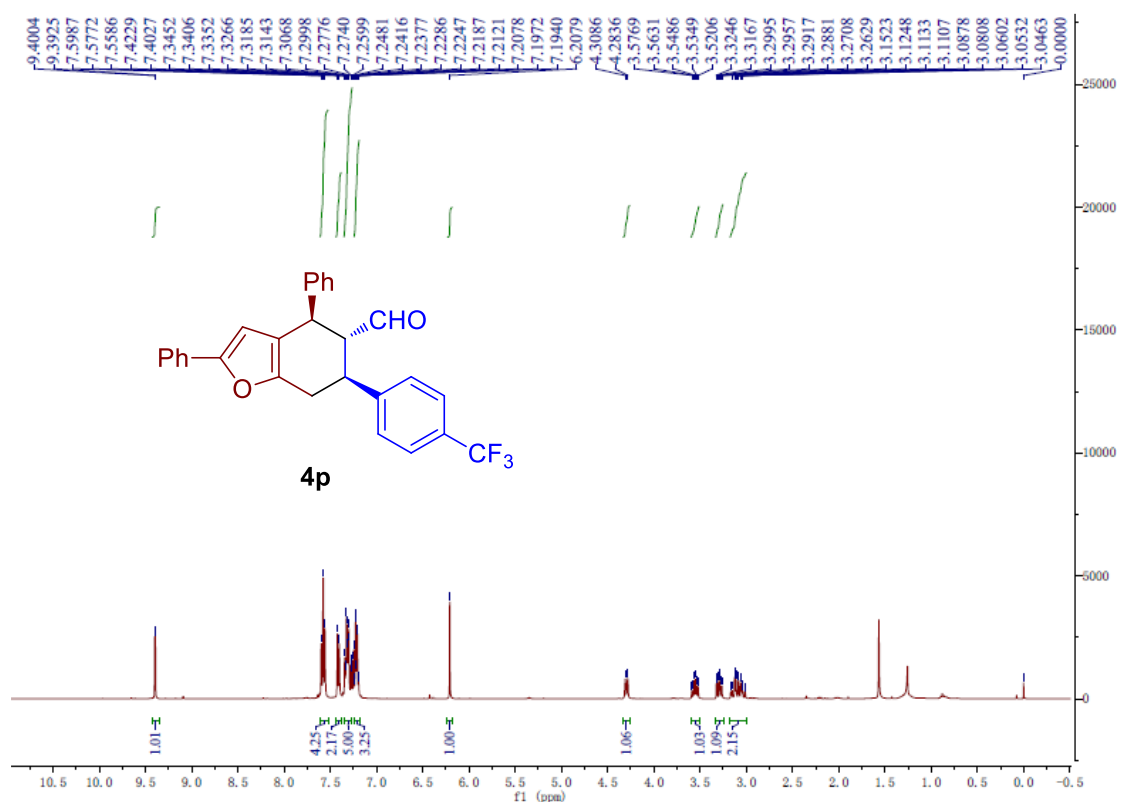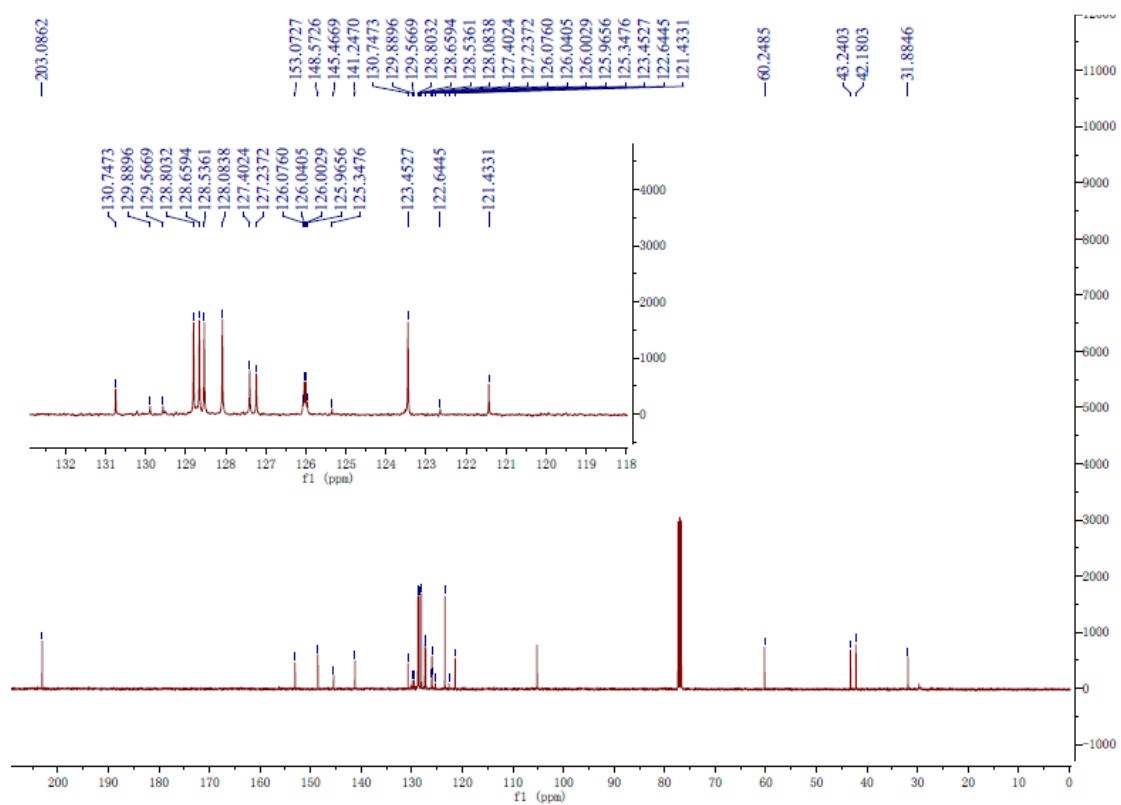

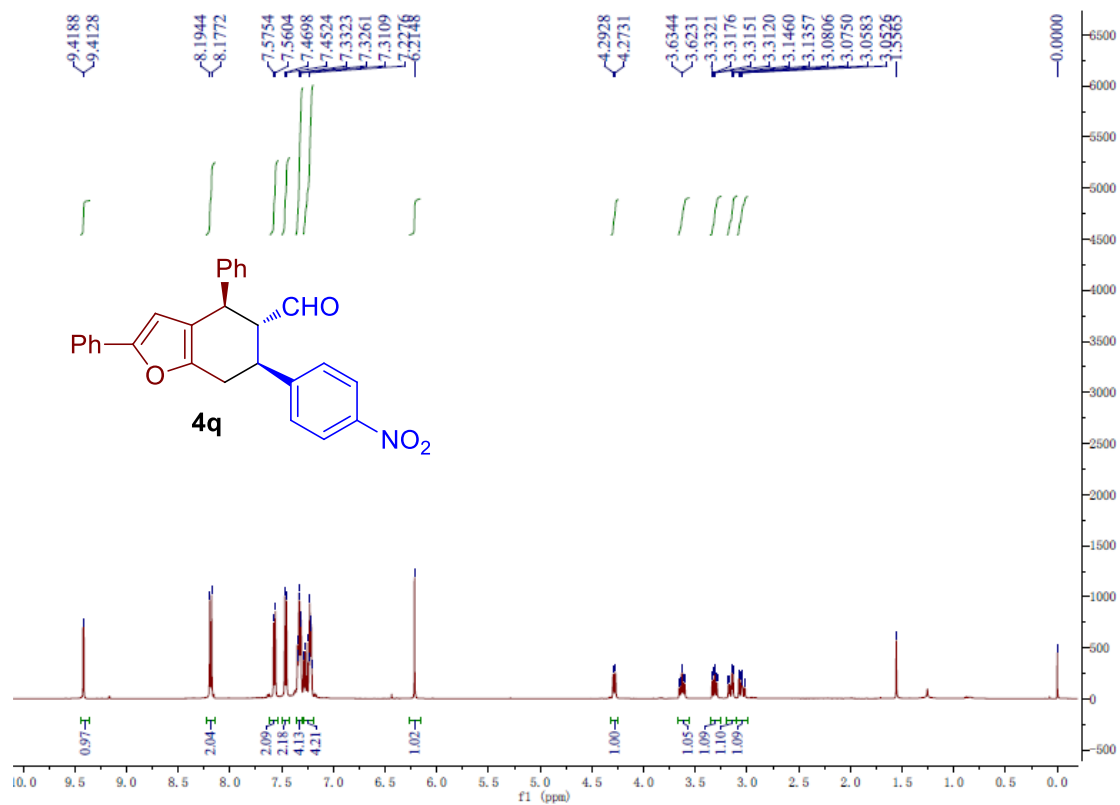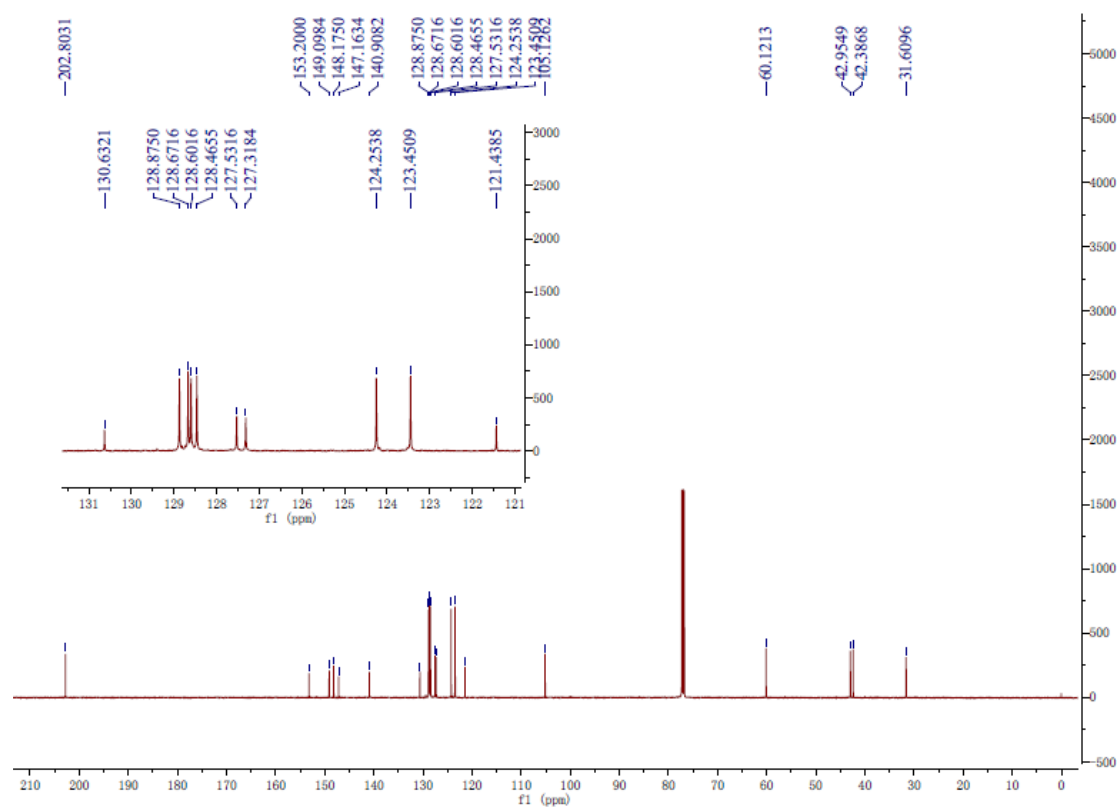

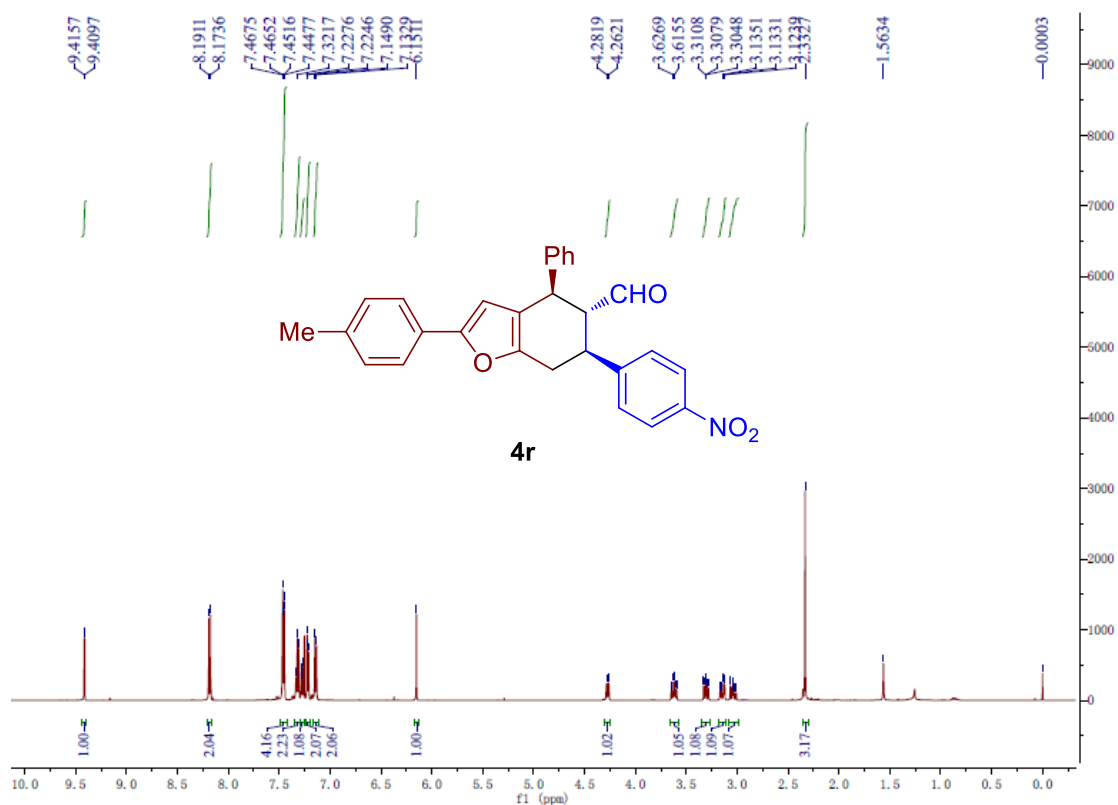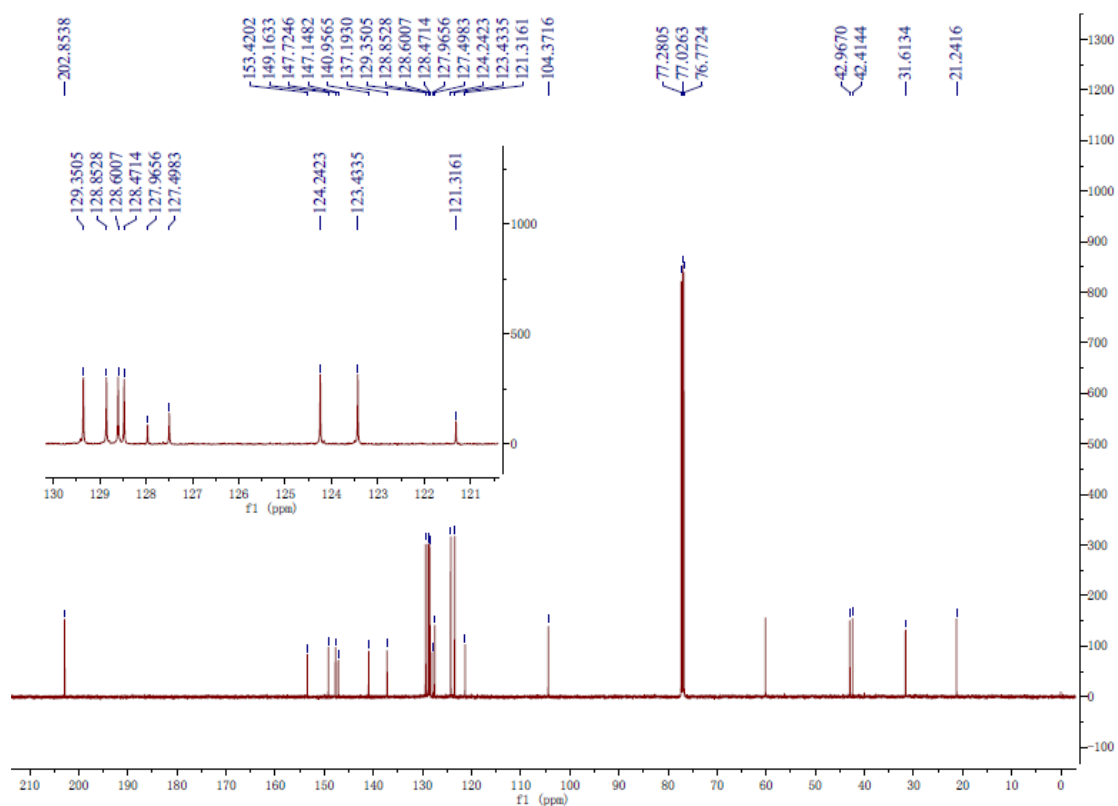

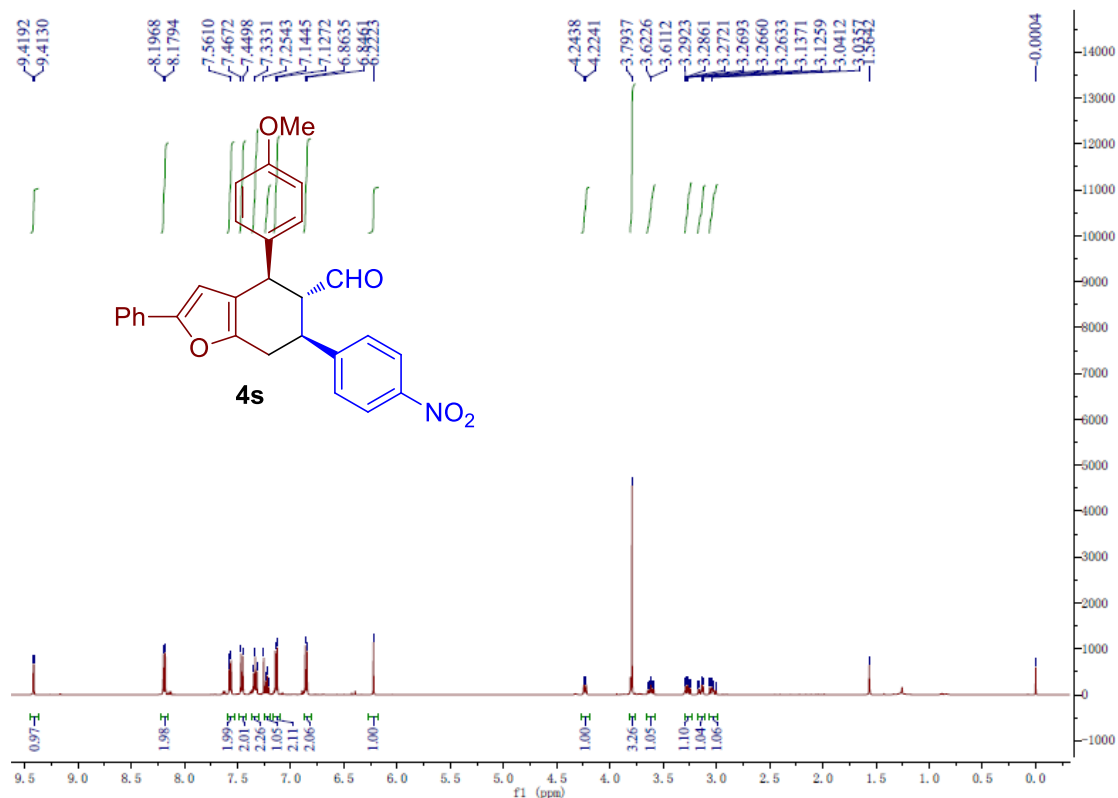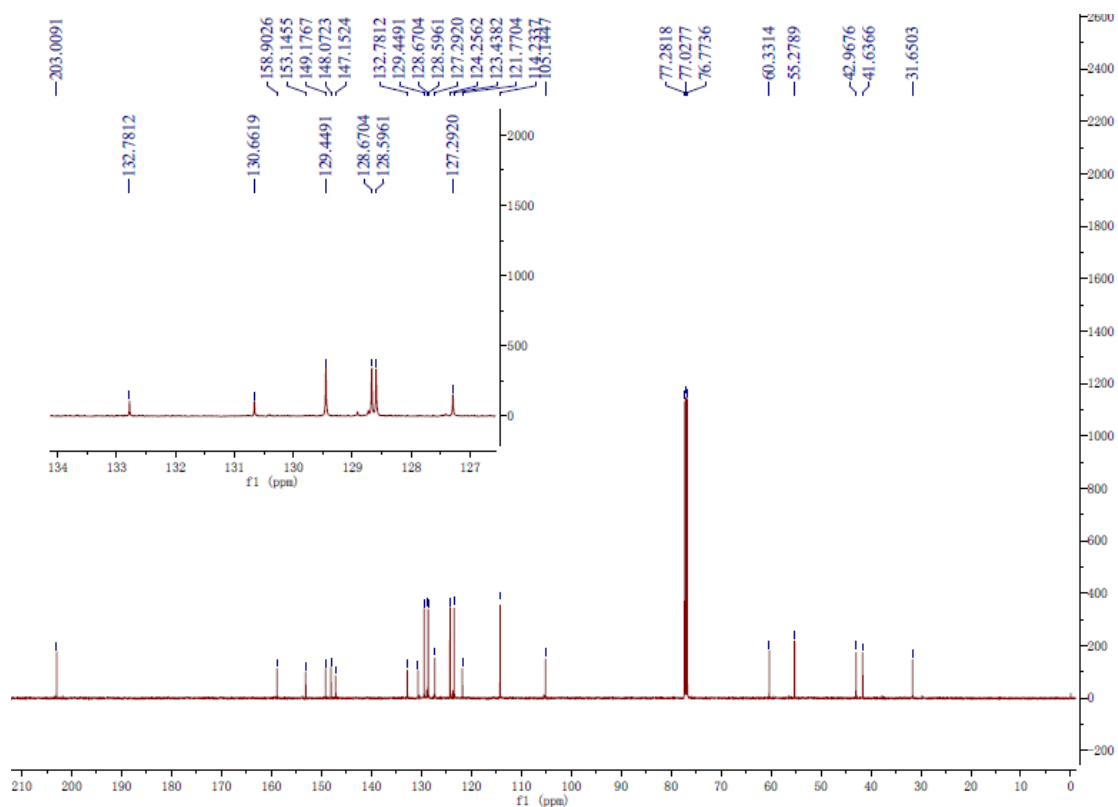

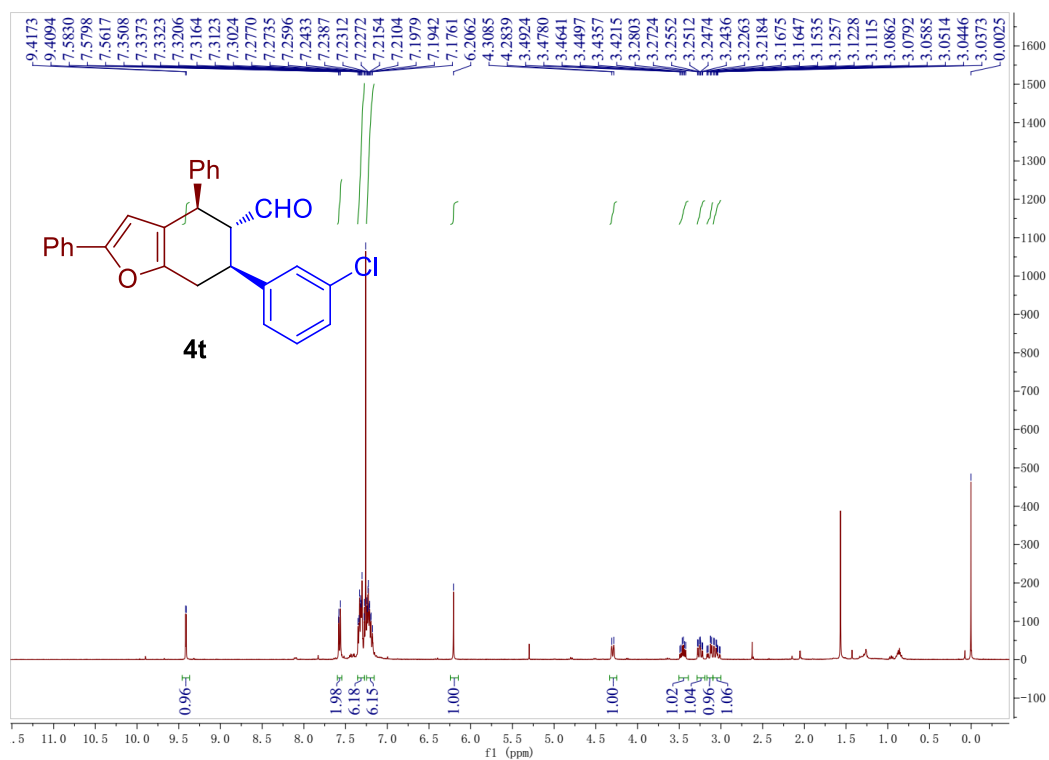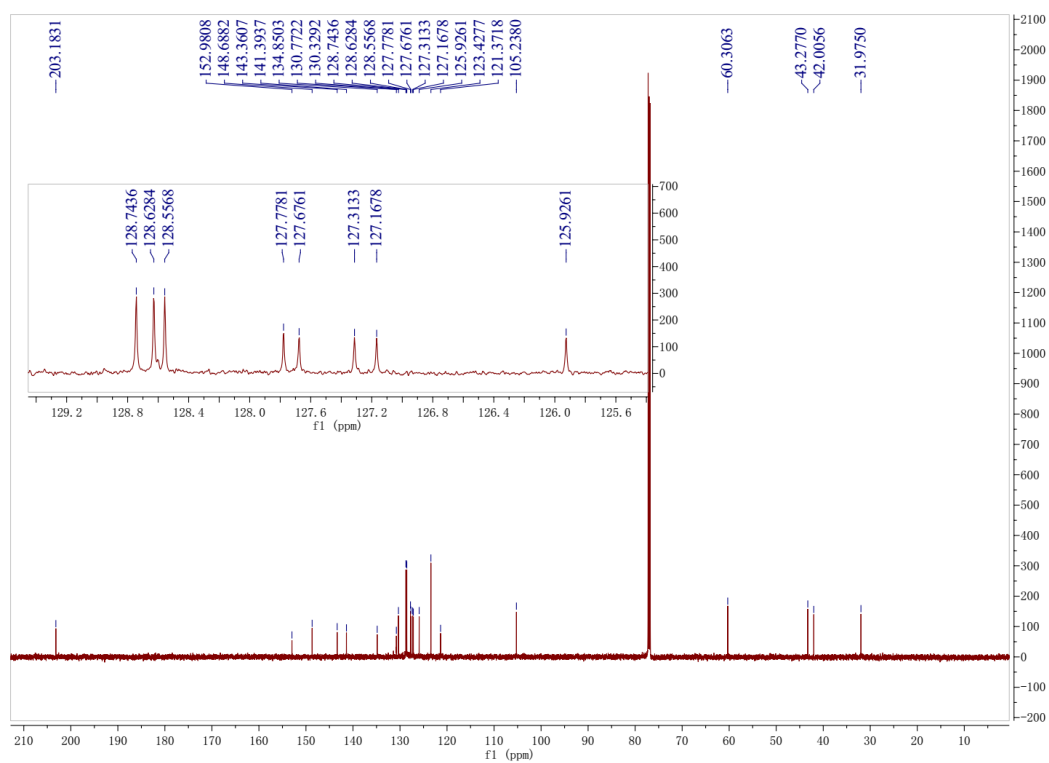

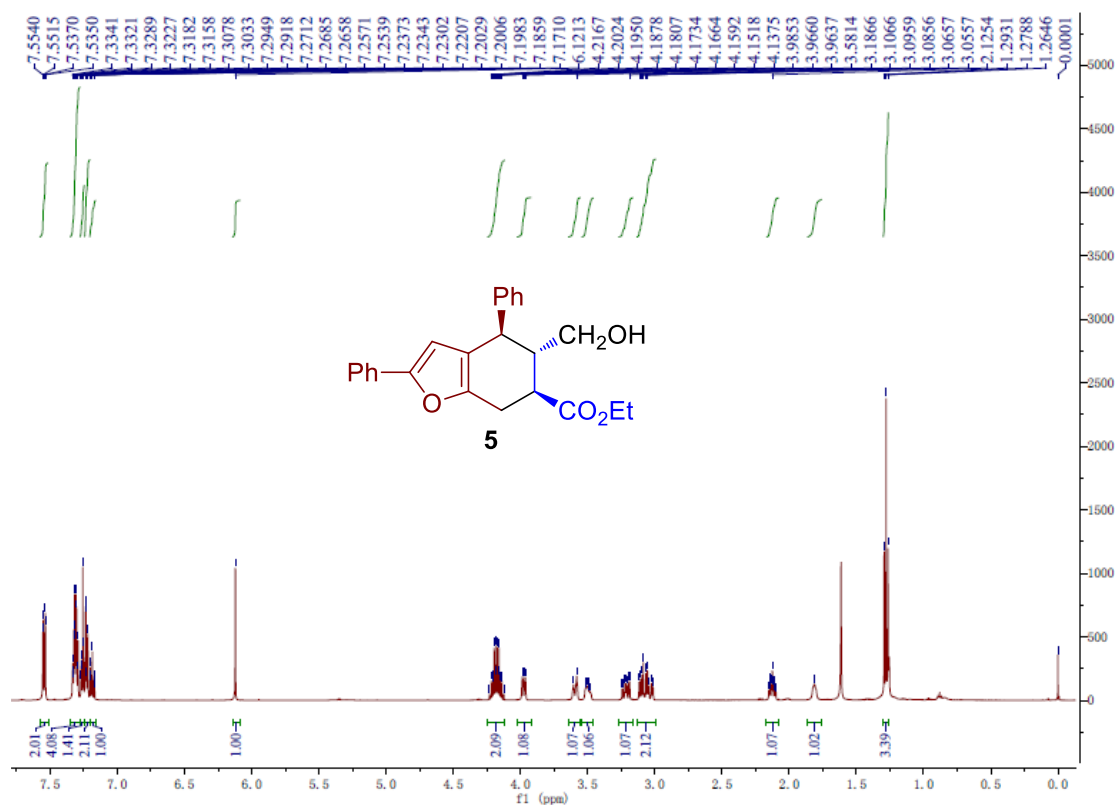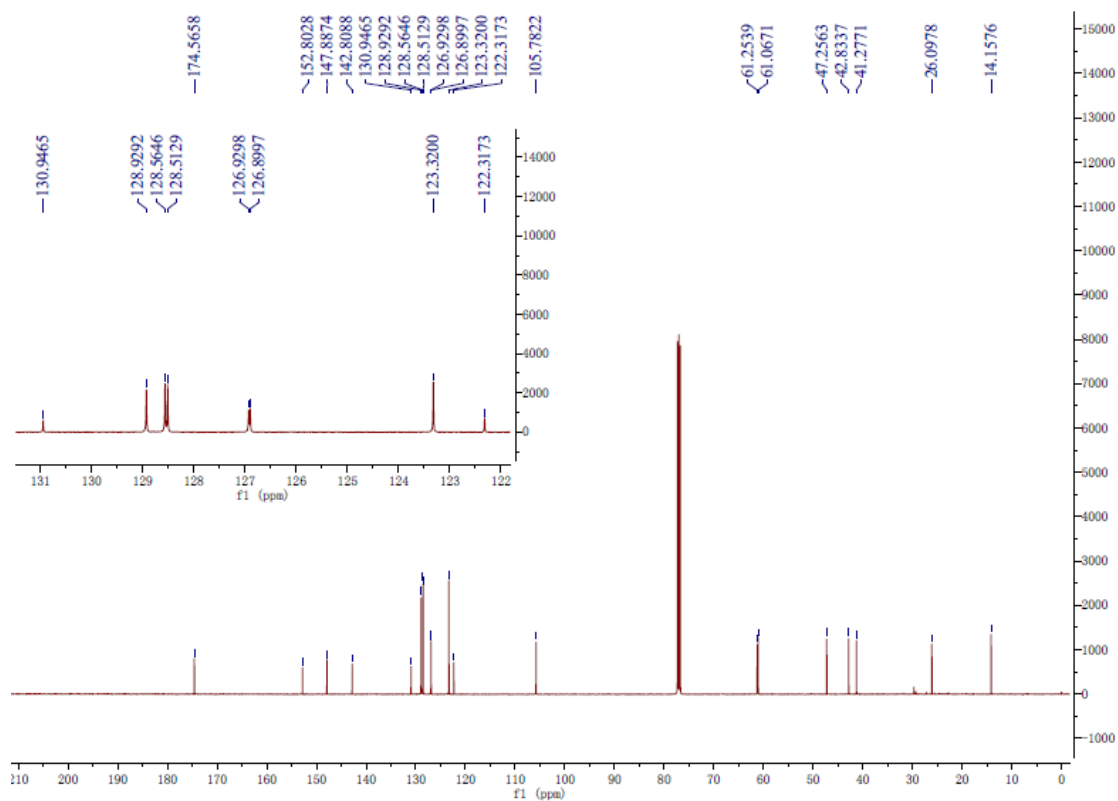

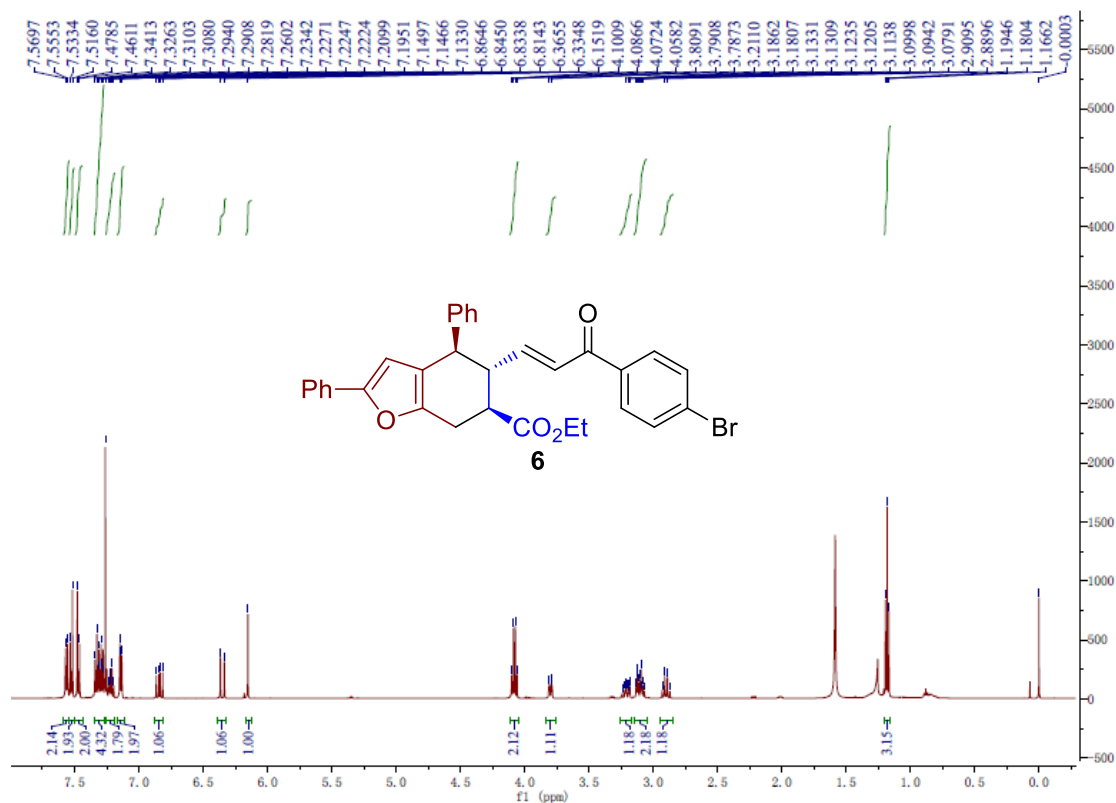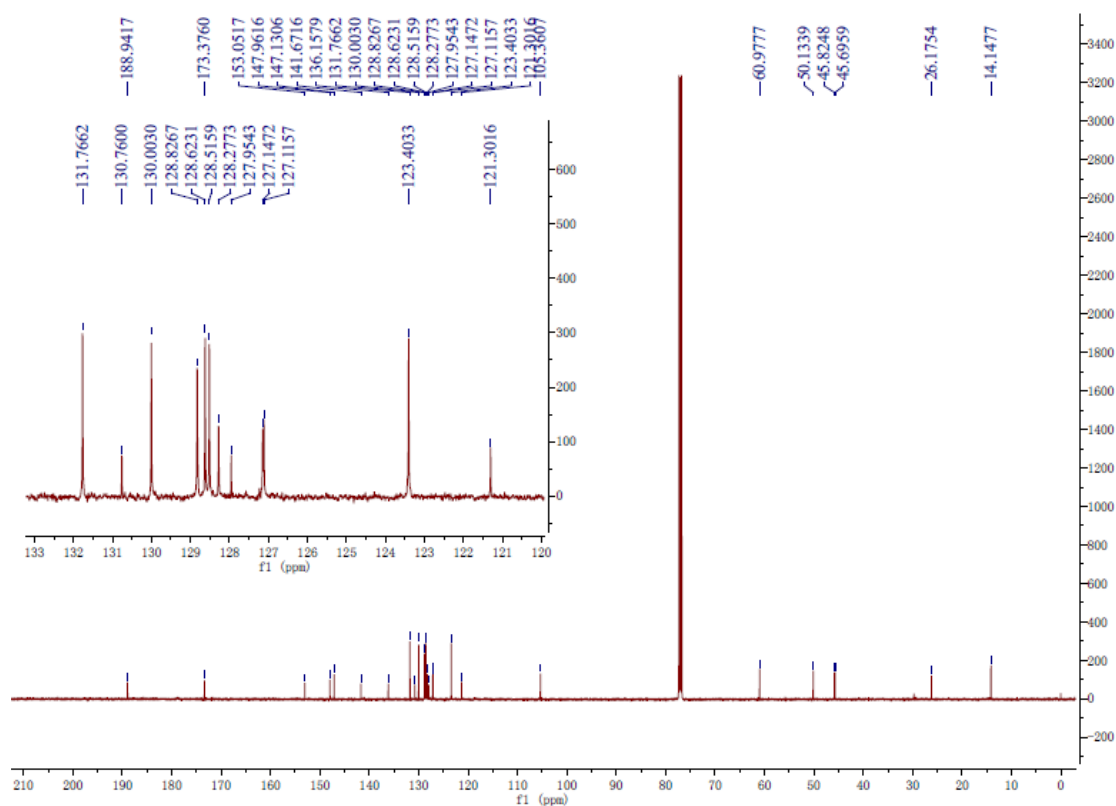

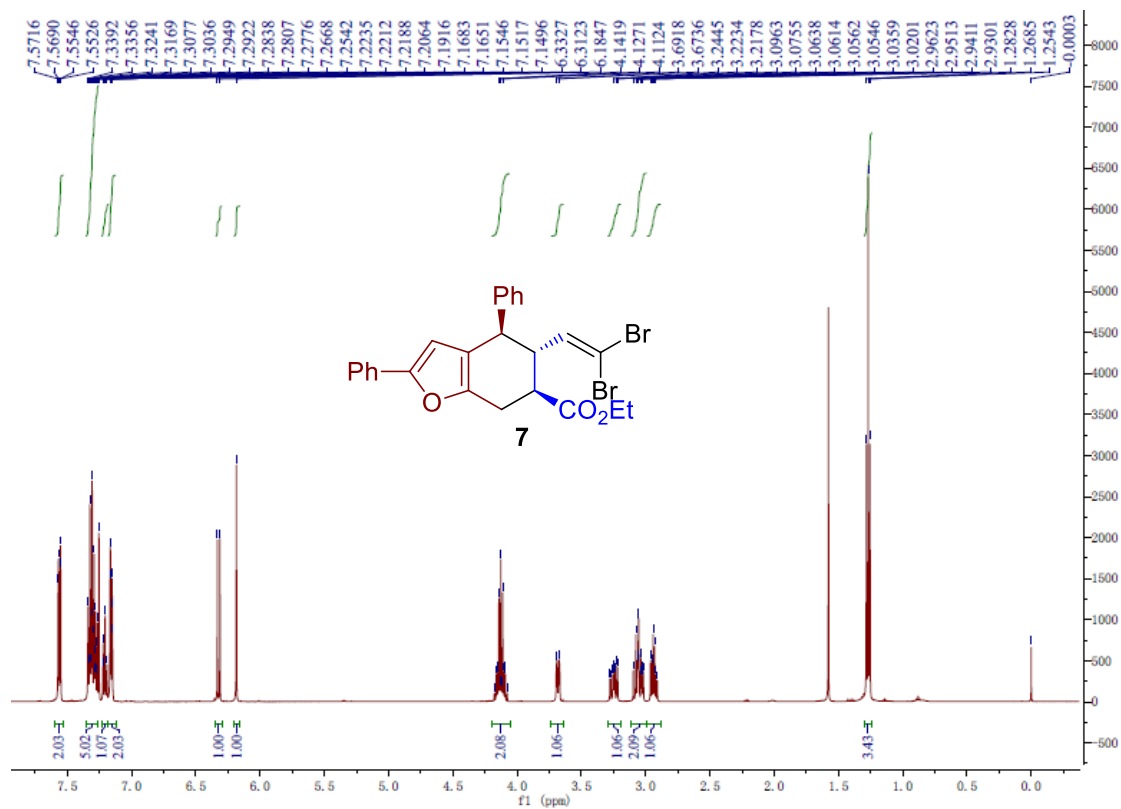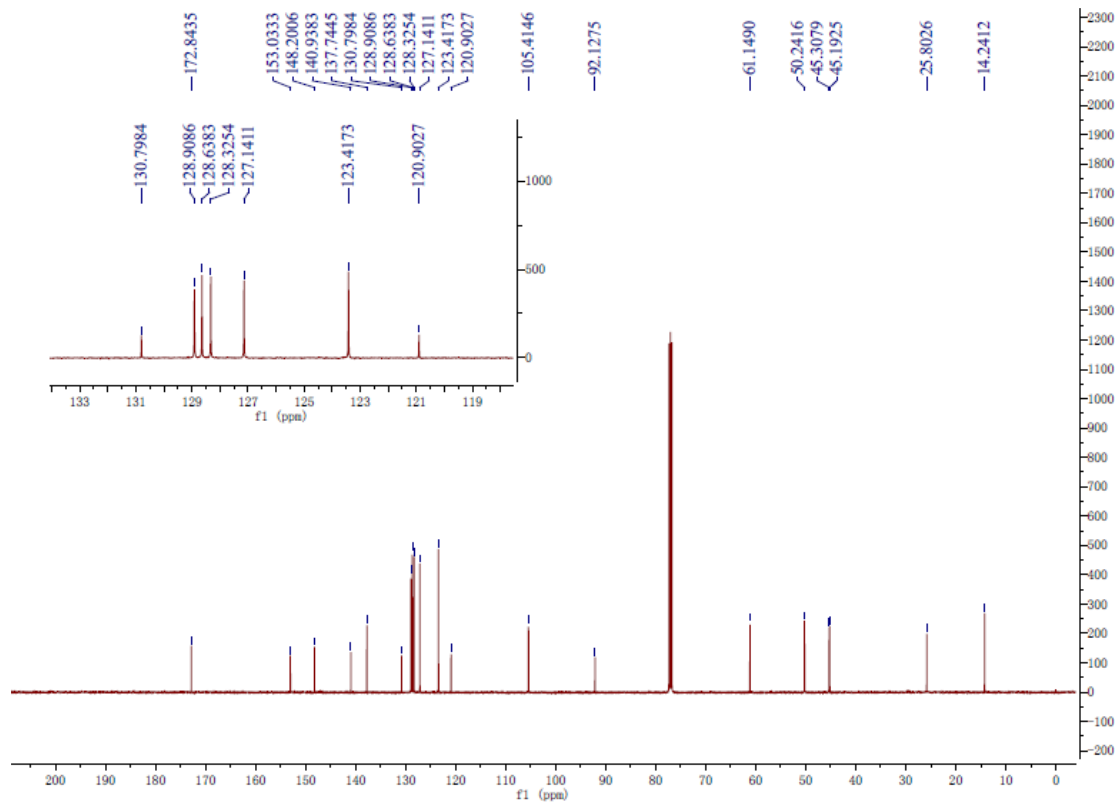

Supplement: d1cc02080c1.pdf [file d1cc02080c1.pdf]
